# Supplementary material
Source: MDPI journal article supplement (https://www.mdpi.com/1999-4907/12/12/1714)
Supplement: s1 [file s1]

Table S1.

| Strain clusters | Type            | Length (bp) | Most similar known clusters                                           | Predicted core clusters                                                               |
|-----------------|-----------------|-------------|-----------------------------------------------------------------------|---------------------------------------------------------------------------------------|
| <b>CAU B946</b> |                 |             |                                                                       |                                                                                       |
| Cluster 1       | Nrps            | 65407       | Surfactin biosynthetic gene cluster (78% of genes show similarity)    | 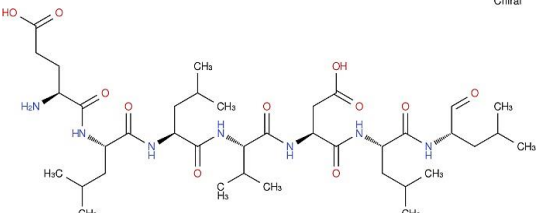   |
| Cluster 2       | Otherks         | 41244       | Butirosin biosynthetic gene cluster (7% of genes show similarity)     | -                                                                                     |
| Cluster 3       | Terpene         | 20740       | -                                                                     | -                                                                                     |
| Cluster 4       | Transatpks      | 85884       | Macrolactin biosynthetic gene cluster (100% of genes show similarity) | -                                                                                     |
| Cluster 5       | Transatpks-Nrps | 102692      | Bacillaene biosynthetic gene cluster (100% of genes show similarity)  |    |
| Cluster 6       | Transatpks-Nrps | 137829      | Fengycin biosynthetic gene cluster (100% of genes show similarity)    |   |
| Cluster 7       | Terpene         | 21883       | -                                                                     | -                                                                                     |
| Cluster 8       | T3pks           | 41109       | -                                                                     | -                                                                                     |
| Cluster 9       | Transatpks      | 95444       | Difficidin biosynthetic gene cluster (100% of genes show similarity)  |  |

Table S1. Continued.

| Strain clusters | Type             | Length (bp) | Most similar known clusters                                             | Predicted core clusters                                                             |
|-----------------|------------------|-------------|-------------------------------------------------------------------------|-------------------------------------------------------------------------------------|
| <b>CAU B946</b> |                  |             |                                                                         |                                                                                     |
| Cluster 10      | Bacteriocin-Nrps | 66793       | Bacillibactin biosynthetic gene cluster (100% of genes show similarity) | 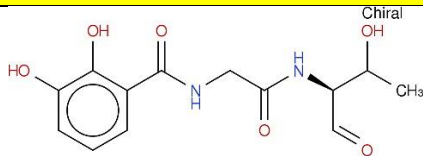 |
| Cluster 11      | Other            | 41418       | Bacilysin biosynthetic gene cluster (100% of genes show similarity)     | -                                                                                   |

Table S1. Continued.

| Strain clusters | Type             | Length (bp) | Most similar known clusters                                             | Predicted core clusters                                                               |
|-----------------|------------------|-------------|-------------------------------------------------------------------------|---------------------------------------------------------------------------------------|
| <b>M27</b>      |                  |             |                                                                         |                                                                                       |
| Cluster 1       | Other            | 41418       | Bacilysin biosynthetic gene cluster (100% of genes show similarity)     | -                                                                                     |
| Cluster 2       | Bacteriocin-Nrps | 51793       | Bacillibactin biosynthetic gene cluster (100% of genes show similarity) | 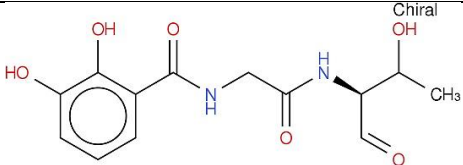   |
| Cluster 3       | Transatpks       | 100450      | Difficidin biosynthetic gene cluster (100% of genes show similarity)    |    |
| Cluster 4       | T3pks            | 41109       | -                                                                       | -                                                                                     |
| Cluster 5       | Terpene          | 21883       | -                                                                       | -                                                                                     |
| Cluster 6       | Nrps             | 22704       | Plipastatin biosynthetic gene cluster (30% of genes show similarity)    | -                                                                                     |
| Cluster 7       | Nrps             | 14947       | Fengycin biosynthetic gene cluster (26% of genes show similarity)       |   |
| Cluster 8       | Nrps             | 10147       | Fengycin biosynthetic gene cluster (13% of genes show similarity)       |  |

Table S1. Continued.

| Strain clusters | Type            | Length (bp) | Most similar known clusters                                           | Predicted core clusters                                                               |
|-----------------|-----------------|-------------|-----------------------------------------------------------------------|---------------------------------------------------------------------------------------|
| <b>M27</b>      |                 |             |                                                                       |                                                                                       |
| Cluster 9       | Nrps-Transatpks | 87564       | Fengycin biosynthetic gene cluster (80% of genes show similarity)     | 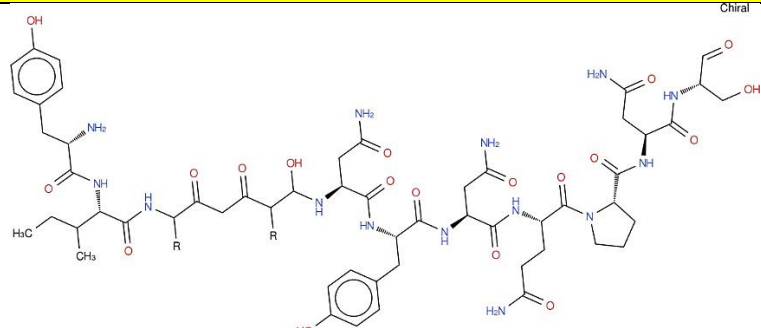   |
| Cluster 10      | Transatpks-Nrps | 102707      | Bacillaene biosynthetic gene cluster (100% of genes show similarity)  |    |
| Cluster 11      | Transatpks      | 85802       | Macrolactin biosynthetic gene cluster (100% of genes show similarity) | -                                                                                     |
| Cluster 12      | Lantipeptide    | 28889       | -                                                                     | -                                                                                     |
| Cluster 13      | Terpene         | 20740       | -                                                                     | -                                                                                     |
| Cluster 14      | Otherks         | 41244       | Butirosin biosynthetic gene cluster (7% of genes show similarity)     | -                                                                                     |
| Cluster 15      | Nrps            | 25161       | Surfactin biosynthetic gene cluster (34% of genes show similarity)    | -                                                                                     |
| Cluster 16      | Nrps            | 38342       | Surfactin biosynthetic gene cluster (52% of genes show similarity)    |  |



Table S1. Continued.

| Strain clusters | Type            | Length (bp) | Most similar known clusters                                           | Predicted core clusters                                                               |
|-----------------|-----------------|-------------|-----------------------------------------------------------------------|---------------------------------------------------------------------------------------|
| <b>AS43.3</b>   |                 |             |                                                                       |                                                                                       |
| Cluster 1       | Nrps            | 65407       | Surfactin biosynthetic gene cluster (91% of genes show similarity)    | 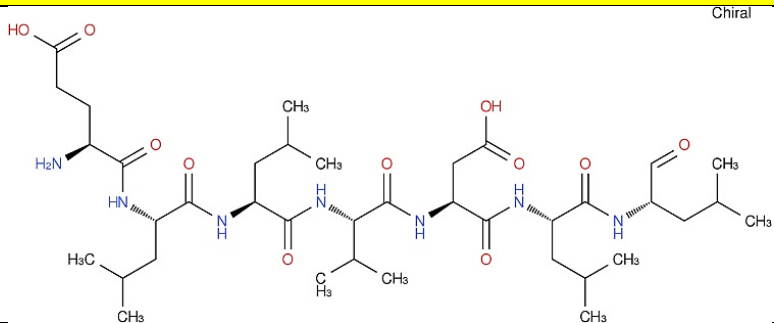   |
| Cluster 2       | Ladderane       | 41217       | -                                                                     | -                                                                                     |
| Cluster 3       | Otherks         | 41244       | Butirosin biosynthetic gene cluster (7% of genes show similarity)     | -                                                                                     |
| Cluster 4       | Terpene         | 20740       | -                                                                     | -                                                                                     |
| Cluster 5       | Transatpks      | 85896       | Macrolactin biosynthetic gene cluster (100% of genes show similarity) | -                                                                                     |
| Cluster 6       | Transatpks-Nrps | 102678      | Bacillaene biosynthetic gene cluster (100% of genes show similarity)  |   |
| Cluster 7       | Transatpks-Nrps | 139085      | Fengycin biosynthetic gene cluster (100% of genes show similarity)    |  |

Table S1. Continued.

| Strain clusters | Type             | Length (bp) | Most similar known clusters                                             | Predicted core clusters                                                             |
|-----------------|------------------|-------------|-------------------------------------------------------------------------|-------------------------------------------------------------------------------------|
| <b>AS43.3</b>   |                  |             |                                                                         |                                                                                     |
| Cluster 8       | Terpene          | 21883       | -                                                                       | -                                                                                   |
| Cluster 9       | T3pks            | 41109       | -                                                                       | -                                                                                   |
| Cluster 10      | Transatpks       | 100449      | Difficidin biosynthetic gene cluster (100% of genes show similarity)    | 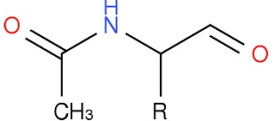 |
| Cluster 11      | Bacteriocin-Nrps | 66790       | Bacillibactin biosynthetic gene cluster (100% of genes show similarity) |  |
| Cluster 12      | Other            | 41418       | Bacilysin biosynthetic gene cluster (100% of genes show similarity)     | -                                                                                   |

Table S1. Continued.

| Strain clusters | Type            | Length (bp) | Most similar known clusters                                           | Predicted core clusters                                                               |
|-----------------|-----------------|-------------|-----------------------------------------------------------------------|---------------------------------------------------------------------------------------|
| <b>FZB42</b>    |                 |             |                                                                       |                                                                                       |
| Cluster 1       | Nrps            | 65407       | Surfactin biosynthetic gene cluster (91% of genes show similarity)    | 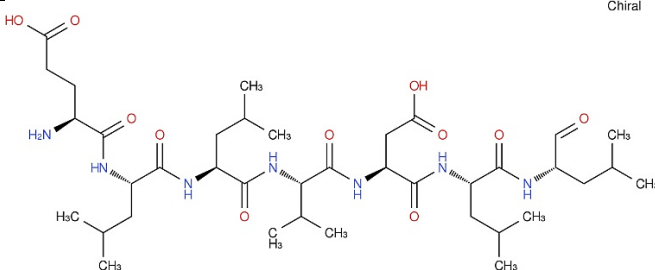   |
| Cluster 2       | Otherks         | 41244       | -                                                                     | -                                                                                     |
| Cluster 3       | Terpene         | 20740       | -                                                                     | -                                                                                     |
| Cluster 4       | Transatpks      | 85899       | Macrolactin biosynthetic gene cluster (100% of genes show similarity) | -                                                                                     |
| Cluster 5       | Transatpks-Nrps | 102683      | Bacillaene biosynthetic gene cluster (100% of genes show similarity)  |    |
| Cluster 6       | Transatpks-Nrps | 137825      | Fengycin biosynthetic gene cluster (100% of genes show similarity)    |   |
| Cluster 7       | Terpene         | 21883       | -                                                                     | -                                                                                     |
| Cluster 8       | T3pks           | 41109       | -                                                                     | -                                                                                     |
| Cluster 9       | Transatpks      | 100447      | Difficidin biosynthetic gene cluster (100% of genes show similarity)  |  |

Table S1. Continued.

| Strain clusters | Type             | Length (bp) | Most similar known clusters                                             | Predicted core clusters                                                                                                                                                                                                                                                                                                                                                                                                                                                                                                                           |
|-----------------|------------------|-------------|-------------------------------------------------------------------------|---------------------------------------------------------------------------------------------------------------------------------------------------------------------------------------------------------------------------------------------------------------------------------------------------------------------------------------------------------------------------------------------------------------------------------------------------------------------------------------------------------------------------------------------------|
| <b>FZB42</b>    |                  |             |                                                                         |                                                                                                                                                                                                                                                                                                                                                                                                                                                                                                                                                   |
| Cluster 10      | Nrps             | 55810       | -                                                                       | -                                                                                                                                                                                                                                                                                                                                                                                                                                                                                                                                                 |
| Cluster 11      | Bacteriocin-Nrps | 66791       | Bacillibactin biosynthetic gene cluster (100% of genes show similarity) | 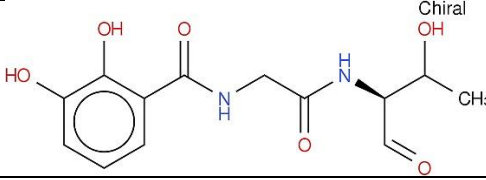<br>The chemical structure of Bacillibactin is shown. It consists of a 3,4,5-trihydroxybenzoyl group (a benzene ring with three hydroxyl groups at positions 3, 4, and 5) linked via an amide bond to a 2-amino-3-oxopropyl chain. This chain is further linked via another amide bond to a chiral center (a carbon atom bonded to a hydrogen atom, a hydroxyl group, a methyl group, and a 2-oxoethyl group). The chiral center is labeled 'Chiral' and 'OH'. |
| Cluster 12      | Other            | 41418       | Bacilysin biosynthetic gene cluster (100% of genes show similarity)     | -                                                                                                                                                                                                                                                                                                                                                                                                                                                                                                                                                 |

Table S1. Continued.

| Strain clusters     | Type             | Length (bp) | Most similar known clusters                                             | Predicted core clusters                                                               |
|---------------------|------------------|-------------|-------------------------------------------------------------------------|---------------------------------------------------------------------------------------|
| <b>AQGM01000001</b> |                  |             |                                                                         |                                                                                       |
| Cluster 1           | Nrps             | 23248       | -                                                                       | -                                                                                     |
| Cluster 2           | Other            | 41418       | Bacilysin biosynthetic gene cluster (100% of genes show similarity)     | -                                                                                     |
| Cluster 3           | Terpene          | 20740       | -                                                                       | -                                                                                     |
| Cluster 4           | Otherks          | 41244       | Butirosin biosynthetic gene cluster (7% of genes show similarity)       | -                                                                                     |
| Cluster 5           | Transatpks-Nrps  | 100101      | Bacillaene biosynthetic gene cluster (100% of genes show similarity)    | 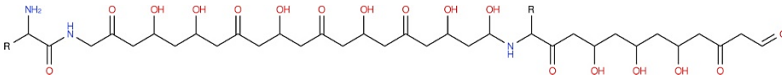   |
| Cluster 6           | Transatpks       | 45842       | Difficidin biosynthetic gene cluster (53% of genes show similarity)     | -                                                                                     |
| Cluster 7           | T3pks            | 41109       | -                                                                       | -                                                                                     |
| Cluster 8           | Transatpks       | 85902       | Macrolactin biosynthetic gene cluster (100% of genes show similarity)   |    |
| Cluster 9           | Phosphonate      | 40902       | -                                                                       | -                                                                                     |
| Cluster 10          | Bacteriocin-Nrps | 51536       | Bacillibactin biosynthetic gene cluster (100% of genes show similarity) |   |
| Cluster 11          | Transatpks-Nrps  | 88037       | Fengycin biosynthetic gene cluster (86% of genes show similarity)       |  |

Table S1. Continued.

| Strain clusters     | Type       | Length (bp) | Most similar known clusters                                          | Predicted core clusters                                                               |
|---------------------|------------|-------------|----------------------------------------------------------------------|---------------------------------------------------------------------------------------|
| <b>AQGM01000001</b> |            |             |                                                                      |                                                                                       |
| Cluster 12          | Transatpks | 28292       | Difficidin biosynthetic gene cluster (46% of genes show similarity)  | 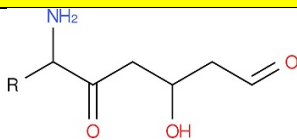   |
| Cluster 13          | Nrps       | 28032       | Surfactin biosynthetic gene cluster (47% of genes show similarity)   |    |
| Cluster 14          | Terpene    | 21883       | -                                                                    | -                                                                                     |
| Cluster 15          | Nrps       | 21780       | Plipastatin biosynthetic gene cluster (30% of genes show similarity) | -                                                                                     |
| Cluster 16          | Transatpks | 23101       | Difficidin biosynthetic gene cluster (26% of genes show similarity)  |    |
| Cluster 17          | Nrps       | 15078       | Surfactin biosynthetic gene cluster (39% of genes show similarity)   | -                                                                                     |
| Cluster 18          | Nrps       | 13069       | Fengycin biosynthetic gene cluster (20% of genes show similarity)    |   |
| Cluster 19          | Nrps       | 9559        | Surfactin biosynthetic gene cluster (8% of genes show similarity)    |  |

Table S1. Continued.

| Strain clusters     | Type | Length (bp) | Most similar known clusters                                       | Predicted core clusters                                                             |
|---------------------|------|-------------|-------------------------------------------------------------------|-------------------------------------------------------------------------------------|
| <b>AQGM01000001</b> |      |             |                                                                   |                                                                                     |
| Cluster 20          | Nrps | 9098        | Fengycin biosynthetic gene cluster (13% of genes show similarity) | 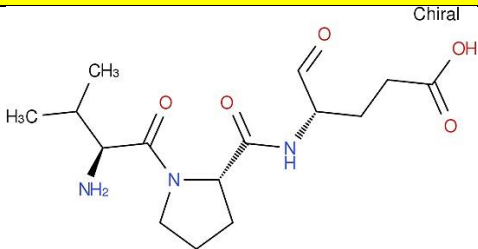 |
| Cluster 21          | Nrps | 6895        | -                                                                 | -                                                                                   |
| Cluster 22          | Nrps | 6499        | -                                                                 | -                                                                                   |

Table S1. Continued.

| Strain clusters | Type            | Length (bp) | Most similar known clusters                                          | Predicted core clusters                                                               |
|-----------------|-----------------|-------------|----------------------------------------------------------------------|---------------------------------------------------------------------------------------|
| <b>NAU-B3</b>   |                 |             |                                                                      |                                                                                       |
| Cluster 1       | Nrps            | 65408       | Surfactin biosynthetic gene cluster (82% of genes show similarity)   | 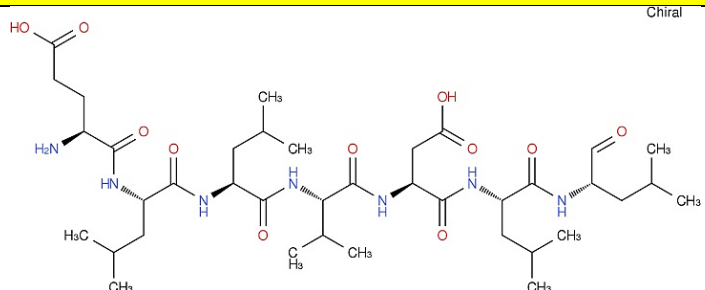   |
| Cluster 2       | Phosphonate     | 40902       | -                                                                    | -                                                                                     |
| Cluster 3       | Transatpks      | 100444      | Difficidin biosynthetic gene cluster (100% of genes show similarity) |    |
| Cluster 4       | T3pks           | 41109       | -                                                                    | -                                                                                     |
| Cluster 5       | Terpene         | 21883       | -                                                                    | -                                                                                     |
| Cluster 6       | Transatpks-Nrps | 137831      | Fengycin biosynthetic gene cluster (100% of genes show similarity)   |   |
| Cluster 7       | Transatpks-Nrps | 102683      | Bacillaene biosynthetic gene cluster (92% of genes show similarity)  |  |
| Cluster 8       | Transatpks      | 78518       | Macrolactin biosynthetic gene cluster (90% of genes show similarity) | -                                                                                     |



Table S1. Continued.

| Strain clusters | Type             | Length (bp) | Most similar known clusters                                             | Predicted core clusters                                                             |
|-----------------|------------------|-------------|-------------------------------------------------------------------------|-------------------------------------------------------------------------------------|
| <b>NAU-B3</b>   |                  |             |                                                                         |                                                                                     |
| Cluster 9       | Terpene          | 20740       | -                                                                       | -                                                                                   |
| Cluster 10      | Otherks          | 41244       | Butirosin biosynthetic gene cluster (7% of genes show similarity)       | -                                                                                   |
| Cluster 11      | Bacteriocin-Nrps | 66795       | Bacillibactin biosynthetic gene cluster (100% of genes show similarity) | 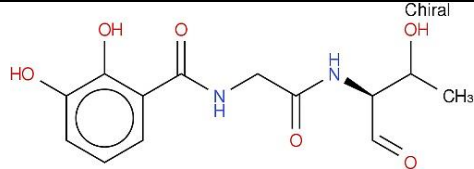 |
| Cluster 12      | Nrps             | 65342       | -                                                                       | -                                                                                   |
| Cluster 13      | Other            | 41418       | Bacilysin biosynthetic gene cluster (100% of genes show similarity)     | -                                                                                   |

Table S1. Continued.

| Strain clusters | Type            | Length (bp) | Most similar known clusters                                           | Predicted core clusters                                                               |
|-----------------|-----------------|-------------|-----------------------------------------------------------------------|---------------------------------------------------------------------------------------|
| <b>SK19.001</b> |                 |             |                                                                       |                                                                                       |
| Cluster 1       | Other           | 41418       | Bacilysin biosynthetic gene cluster (100% of genes show similarity)   | -                                                                                     |
| Cluster 2       | Transatpks-Nrps | 82374       | Bacillaene biosynthetic gene cluster (100% of genes show similarity)  | 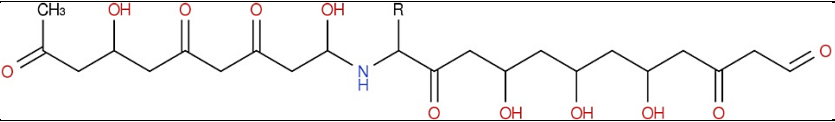   |
| Cluster 3       | Transatpks      | 85902       | Macrolactin biosynthetic gene cluster (100% of genes show similarity) |    |
| Cluster 4       | Otherks         | 41244       | Butirosin biosynthetic gene cluster (7% of genes show similarity)     | -                                                                                     |
| Cluster 5       | Terpene         | 20740       | -                                                                     | -                                                                                     |
| Cluster 6       | Lantipeptide    | 28889       | -                                                                     | -                                                                                     |
| Cluster 7       | Terpene         | 21883       | -                                                                     | -                                                                                     |
| Cluster 8       | Transatpks      | 45822       | Difficidin biosynthetic gene cluster (53% of genes show similarity)   |    |
| Cluster 9       | Transatpks      | 28322       | Difficidin biosynthetic gene cluster (46% of genes show similarity)   |   |
| Cluster 10      | Nrps            | 25189       | Surfactin biosynthetic gene cluster (39% of genes show similarity)    | -                                                                                     |
| Cluster 11      | Nrps-Transatpks | 87842       | Fengycin biosynthetic gene cluster (80% of genes show similarity)     |  |

Table S1. Continued.

| Strain clusters | Type             | Length (bp) | Most similar known clusters                                             | Predicted core clusters                                                               |
|-----------------|------------------|-------------|-------------------------------------------------------------------------|---------------------------------------------------------------------------------------|
| <b>SK19.001</b> |                  |             |                                                                         |                                                                                       |
| Cluster 12      | Bacteriocin-Nrps | 51522       | Bacillibactin biosynthetic gene cluster (100% of genes show similarity) | 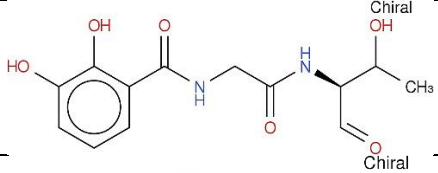   |
| Cluster 13      | Nrps             | 27628       | Surfactin biosynthetic gene cluster (47% of genes show similarity)      |    |
| Cluster 14      | Transatpk        | 23032       | Difficidin biosynthetic gene cluster (26% of genes show similarity)     |    |
| Cluster 15      | Nrps             | 21896       | Fengycin biosynthetic gene cluster (20% of genes show similarity)       |    |
| Cluster 16      | Nrps             | 14781       | Plipastatin biosynthetic gene cluster (38% of genes show similarity)    | -                                                                                     |
| Cluster 17      | Nrps             | 8947        | Surfactin biosynthetic gene cluster (8% of genes show similarity)       |  |
| Cluster 18      | Bacteriocin      | 6571        | -                                                                       | -                                                                                     |
| Cluster 19      | Nrps             | 1883        | -                                                                       | -                                                                                     |

Table S1. Continued.

| Strain clusters | Type           | Length (bp) | Most similar known clusters                                            | Predicted core clusters                                                               |
|-----------------|----------------|-------------|------------------------------------------------------------------------|---------------------------------------------------------------------------------------|
| <b>9912D</b>    |                |             |                                                                        |                                                                                       |
| Cluster 1       | Nrps           | 65407       | Surfactin biosynthetic gene cluster (82% of genes show similarity)     | 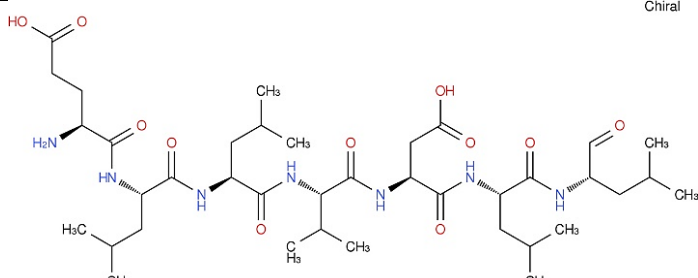   |
| Cluster 2       | Otherks        | 41244       | Butirosin biosynthetic gene cluster (7% of genes show similarity)      | -                                                                                     |
| Cluster 3       | Terpene        | 20740       | -                                                                      | -                                                                                     |
| Cluster 4       | Lantipeptide   | 28889       | Micrococcin P1 biosynthetic gene cluster (8% of genes show similarity) | -                                                                                     |
| Cluster 5       | Transatpk      | 85902       | Macrolactin biosynthetic gene cluster (100% of genes show similarity)  | -                                                                                     |
| Cluster 6       | Transatpk-Nrps | 83665       | Bacillaene biosynthetic gene cluster (100% of genes show similarity)   |   |
| Cluster 7       | Transatpk-Nrps | 136487      | Fengycin biosynthetic gene cluster (93% of genes show similarity)      |  |

Table S1. Continued.

| Strain clusters | Type             | Length (bp) | Most similar known clusters                                             | Predicted core clusters                                                             |
|-----------------|------------------|-------------|-------------------------------------------------------------------------|-------------------------------------------------------------------------------------|
| <b>9912D</b>    |                  |             |                                                                         |                                                                                     |
| Cluster 8       | Terpene          | 21883       | -                                                                       | -                                                                                   |
| Cluster 9       | Transatpks       | 100447      | Difficidin biosynthetic gene cluster (100% of genes show similarity)    | 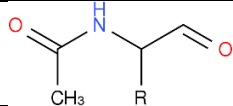 |
| Cluster 10      | Bacteriocin-Nrps | 66791       | Bacillibactin biosynthetic gene cluster (100% of genes show similarity) |  |
| Cluster 11      | Other            | 41418       | Bacilysin biosynthetic gene cluster (100% of genes show similarity)     | -                                                                                   |

Table S1. Continued.

| Strain clusters | Type            | Length (bp) | Most similar known clusters                                           | Predicted core clusters                                                               |
|-----------------|-----------------|-------------|-----------------------------------------------------------------------|---------------------------------------------------------------------------------------|
| <b>JJ-D34</b>   |                 |             |                                                                       |                                                                                       |
| Cluster 1       | Nrps            | 65407       | Surfactin biosynthetic gene cluster (78% of genes show similarity)    | 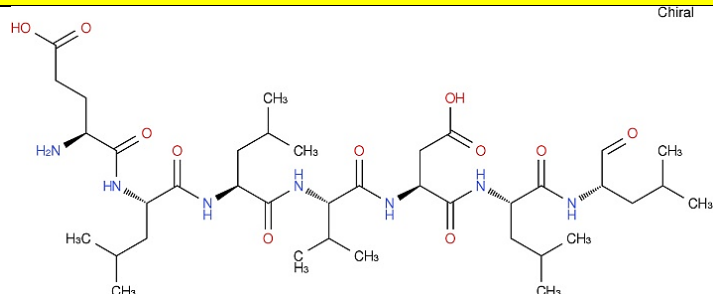   |
| Cluster 2       | Thiopeptide     | 45069       | Kijanamicin biosynthetic gene cluster (4% of genes show similarity)   | -                                                                                     |
| Cluster 3       | Otherks         | 41244       | Butirosin biosynthetic gene cluster (7% of genes show similarity)     | -                                                                                     |
| Cluster 4       | Terpene         | 20740       | -                                                                     | -                                                                                     |
| Cluster 5       | Transatpks      | 85887       | Macrolactin biosynthetic gene cluster (100% of genes show similarity) | -                                                                                     |
| Cluster 6       | Transatpks-Nrps | 102692      | Bacillaene biosynthetic gene cluster (100% of genes show similarity)  |   |
| Cluster 7       | Transatpks-Nrps | 137832      | Fengycin biosynthetic gene cluster (100% of genes show similarity)    |  |

Table S1. Continued.

| Strain clusters | Type             | Length (bp) | Most similar known clusters                                             | Predicted core clusters                                                             |
|-----------------|------------------|-------------|-------------------------------------------------------------------------|-------------------------------------------------------------------------------------|
| <b>JJ-D34</b>   |                  |             |                                                                         |                                                                                     |
| Cluster 8       | Terpene          | 21883       | -                                                                       | -                                                                                   |
| Cluster 9       | T3pks            | 41109       | -                                                                       | -                                                                                   |
| Cluster 10      | Transatpks       | 100450      | Difficidin biosynthetic gene cluster (100% of genes show similarity)    | 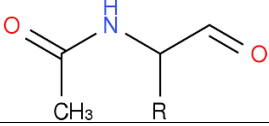 |
| Cluster 11      | Bacteriocin-Nrps | 66792       | Bacillibactin biosynthetic gene cluster (100% of genes show similarity) |  |
| Cluster 12      | Other            | 41418       | Bacilysin biosynthetic gene cluster (100% of genes show similarity)     | -                                                                                   |

Table S1. Continued.

| Strain clusters         | Type             | Length (bp) | Most similar known clusters                                             | Predicted core clusters                                                               |
|-------------------------|------------------|-------------|-------------------------------------------------------------------------|---------------------------------------------------------------------------------------|
| <b>CBMB205_complete</b> |                  |             |                                                                         |                                                                                       |
| Cluster 1               | Other            | 41418       | Bacilysin biosynthetic gene cluster (100% of genes show similarity)     | -                                                                                     |
| Cluster 2               | Bacteriocin-Nrps | 66791       | Bacillibactin biosynthetic gene cluster (100% of genes show similarity) | 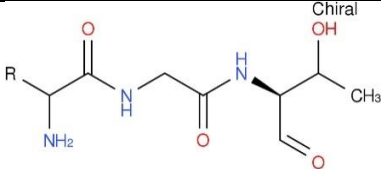   |
| Cluster 3               | Transatpks       | 100453      | Difficidin biosynthetic gene cluster (100% of genes show similarity)    |    |
| Cluster 4               | T3pks            | 41100       | -                                                                       | -                                                                                     |
| Cluster 5               | Terpene          | 21883       | -                                                                       | -                                                                                     |
| Cluster 6               | Transatpks-Nrps  | 137801      | Fengycin biosynthetic gene cluster (100% of genes show similarity)      |   |
| Cluster 7               | Transatpks-Nrps  | 102674      | Bacillaene biosynthetic gene cluster (100% of genes show similarity)    |  |
| Cluster 8               | Transatpks       | 85905       | Macrolactin biosynthetic gene cluster (100% of genes show similarity)   | -                                                                                     |
| Cluster 9               | Lantipeptide     | 28888       | -                                                                       | -                                                                                     |
| Cluster 10              | Terpene          | 20740       | -                                                                       | -                                                                                     |



Table S1. Continued.

| Strain clusters         | Type    | Length (bp) | Most similar known clusters                                        | Predicted core clusters                                                             |
|-------------------------|---------|-------------|--------------------------------------------------------------------|-------------------------------------------------------------------------------------|
| <b>CBMB205_complete</b> |         |             |                                                                    |                                                                                     |
| Cluster 11              | Otherks | 41244       | Butirosin biosynthetic gene cluster (7% of genes show similarity)  | -                                                                                   |
| Cluster 12              | Nrps    | 65407       | Surfactin biosynthetic gene cluster (82% of genes show similarity) | 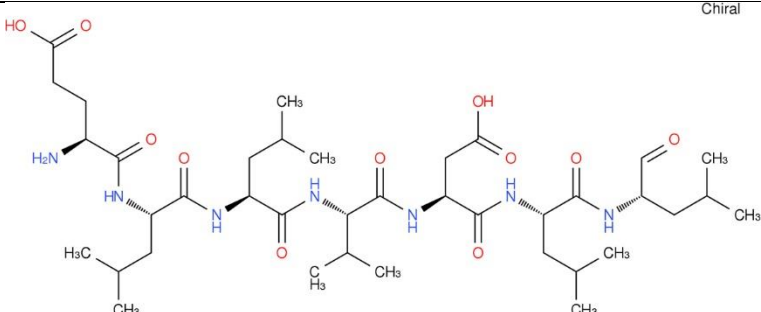 |

Table S1. Continued.

| Strain clusters         | Type             | Length (bp) | Most similar known clusters                                             | Predicted core clusters                                                               |
|-------------------------|------------------|-------------|-------------------------------------------------------------------------|---------------------------------------------------------------------------------------|
| <b>CBMB205_assembly</b> |                  |             |                                                                         |                                                                                       |
| Cluster 1               | Transatpks-Nrps  | 87730       | Fengycin biosynthetic gene cluster (80% of genes show similarity)       | 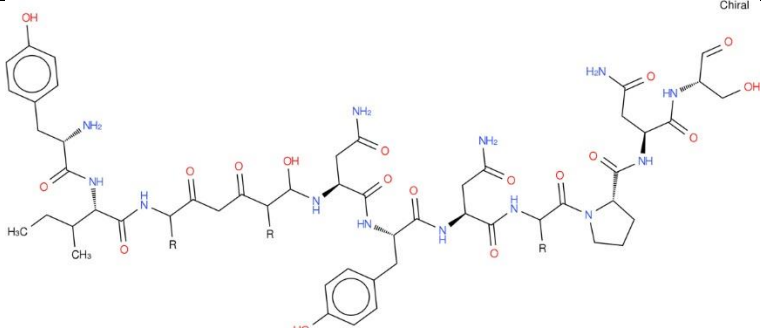   |
| Cluster 2               | Transatpks-Nrps  | 102674      | Bacillaene biosynthetic gene cluster (100% of genes show similarity)    |    |
| Cluster 3               | Transatpks       | 85905       | Macrolactin biosynthetic gene cluster (100% of genes show similarity)   | -                                                                                     |
| Cluster 4               | Lantipeptide     | 28888       | -                                                                       | -                                                                                     |
| Cluster 5               | Terpene          | 20740       | -                                                                       | -                                                                                     |
| Cluster 6               | Otherks          | 41244       | Butirosin biosynthetic gene cluster (7% of genes show similarity)       | -                                                                                     |
| Cluster 7               | Other            | 41418       | Bacilysin biosynthetic gene cluster (100% of genes show similarity)     | -                                                                                     |
| Cluster 8               | Bacteriocin-Nrps | 66791       | Bacillibactin biosynthetic gene cluster (100% of genes show similarity) |  |
| Cluster 9               | Nrps             | 22185       | Plipastatin biosynthetic gene cluster (30% of genes show similarity)    | -                                                                                     |
| Cluster 10              | Terpene          | 21883       | -                                                                       | -                                                                                     |
| Cluster 11              | T3pks            | 41100       | -                                                                       | -                                                                                     |

Table S1. Continued.

| Strain clusters         | Type       | Length (bp) | Most similar known clusters                                         | Predicted core clusters                                                               |
|-------------------------|------------|-------------|---------------------------------------------------------------------|---------------------------------------------------------------------------------------|
| <b>CBMB205_assembly</b> |            |             |                                                                     |                                                                                       |
| Cluster 12              | Transatpks | 75784       | Difficidin biosynthetic gene cluster (86% of genes show similarity) | 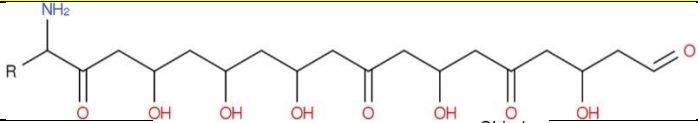   |
| Cluster 13              | Nrps       | 26566       | Surfactin biosynthetic gene cluster (39% of genes show similarity)  |    |
| Cluster 14              | Nrps       | 28255       | Surfactin biosynthetic gene cluster (47% of genes show similarity)  |    |
| Cluster 15              | Transatpks | 24565       | Difficidin biosynthetic gene cluster (26% of genes show similarity) |    |
| Cluster 16              | Nrps       | 13586       | Fengycin biosynthetic gene cluster (20% of genes show similarity)   |   |
| Cluster 17              | Nrps       | 10519       | Surfactin biosynthetic gene cluster (8% of genes show similarity)   |  |

Table S1. Continued.

| Strain clusters         | Type | Length (bp) | Most similar known clusters                                       | Predicted core clusters                                                             |
|-------------------------|------|-------------|-------------------------------------------------------------------|-------------------------------------------------------------------------------------|
| <b>CBMB205_assembly</b> |      |             |                                                                   |                                                                                     |
| Cluster 18              | Nrps | 10053       | Fengycin biosynthetic gene cluster (13% of genes show similarity) | 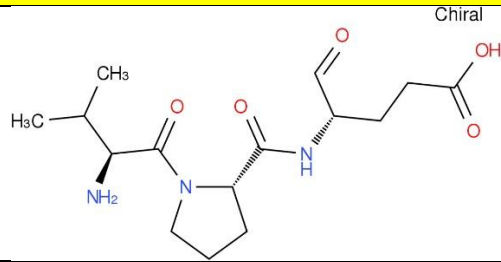 |

Table S1. Continued.

| Strain clusters | Type             | Length (bp) | Most similar known clusters                                             | Predicted core clusters                                                               |
|-----------------|------------------|-------------|-------------------------------------------------------------------------|---------------------------------------------------------------------------------------|
| <b>FKM10</b>    |                  |             |                                                                         |                                                                                       |
| Cluster 1       | Other            | 41418       | Bacilysin biosynthetic gene cluster (100% of genes show similarity)     | -                                                                                     |
| Cluster 2       | Bacteriocin-Nrps | 51791       | Bacillibactin biosynthetic gene cluster (100% of genes show similarity) | 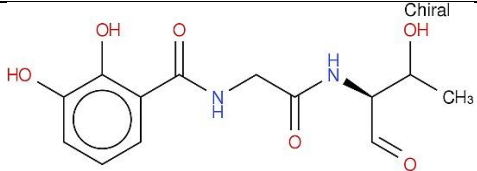   |
| Cluster 3       | Transatpks       | 100453      | Difficidin biosynthetic gene cluster (100% of genes show similarity)    |    |
| Cluster 4       | T3pks            | 41109       | -                                                                       | -                                                                                     |
| Cluster 5       | Terpene          | 21883       | -                                                                       | -                                                                                     |
| Cluster 6       | Nrps-Transatpks  | 137801      | Fengycin biosynthetic gene cluster (100% of genes show similarity)      |   |
| Cluster 7       | Transatpks-Nrps  | 102674      | Bacillaene biosynthetic gene cluster (100% of genes show similarity)    |  |
| Cluster 8       | Transatpks       | 85905       | Macrolactin biosynthetic gene cluster (90% of genes show similarity)    | -                                                                                     |
| Cluster 9       | Lantipeptide     | 28888       | -                                                                       | -                                                                                     |

Table S1. Continued.

| Strain clusters | Type    | Length (bp) | Most similar known clusters                                        | Predicted core clusters                                                             |
|-----------------|---------|-------------|--------------------------------------------------------------------|-------------------------------------------------------------------------------------|
| <b>FKM10</b>    |         |             |                                                                    |                                                                                     |
| Cluster 10      | Terpene | 20740       | -                                                                  | -                                                                                   |
| Cluster 11      | Otherks | 41244       | Butirosin biosynthetic gene cluster (7% of genes show similarity)  | -                                                                                   |
| Cluster 12      | Nrps    | 65407       | Surfactin biosynthetic gene cluster (78% of genes show similarity) | 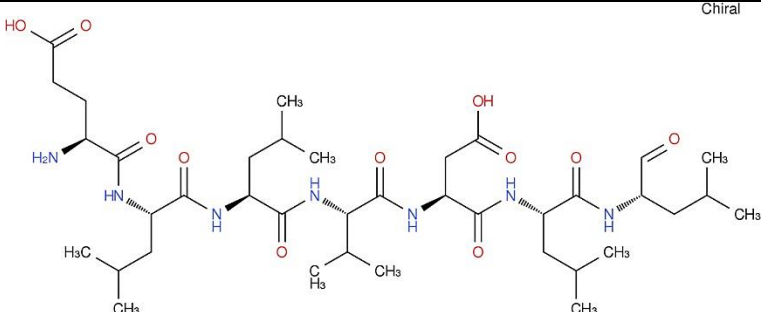 |

Table S1. Continued.

| Strain clusters | Type            | Length (bp) | Most similar known clusters                                           | Predicted core clusters                                                               |
|-----------------|-----------------|-------------|-----------------------------------------------------------------------|---------------------------------------------------------------------------------------|
| <b>K26</b>      |                 |             |                                                                       |                                                                                       |
| Cluster 1       | Other           | 41418       | Bacilysin biosynthetic gene cluster (100% of genes show similarity)   | -                                                                                     |
| Cluster 2       | Transatpks      | 85902       | Macrolactin biosynthetic gene cluster (100% of genes show similarity) | 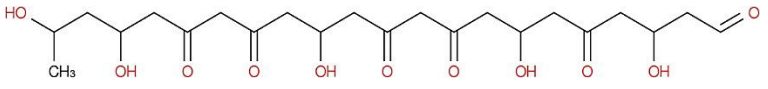   |
| Cluster 3       | Transatpks-Nrps | 82375       | Bacillaene biosynthetic gene cluster (100% of genes show similarity)  |    |
| Cluster 4       | Transatpks-Nrps | 111670      | Fengycin biosynthetic gene cluster (93% of genes show similarity)     |    |
| Cluster 5       | Terpene         | 21883       | -                                                                     | -                                                                                     |
| Cluster 6       | Transatpks      | 100444      | Difficidin biosynthetic gene cluster (100% of genes show similarity)  |   |
| Cluster 7       | Lantipeptide    | 28889       | -                                                                     | -                                                                                     |
| Cluster 8       | Terpene         | 20740       | -                                                                     | -                                                                                     |
| Cluster 9       | Otherks         | 41244       | Butirosin biosynthetic gene cluster (7% of genes show similarity)     | -                                                                                     |
| Cluster 10      | Nrps            | 27949       | Surfactin biosynthetic gene cluster (47% of genes show similarity)    |  |

Table S1. Continued.

| Strain clusters | Type             | Length (bp) | Most similar known clusters                                             | Predicted core clusters                                                             |
|-----------------|------------------|-------------|-------------------------------------------------------------------------|-------------------------------------------------------------------------------------|
| <b>K26</b>      |                  |             |                                                                         |                                                                                     |
| Cluster 11      | Nrps             | 26083       | Surfactin biosynthetic gene cluster (39% of genes show similarity)      | -                                                                                   |
| Cluster 12      | Ladderane        | 41217       | -                                                                       | -                                                                                   |
| Cluster 13      | Bacteriocin-Nrps | 66792       | Bacillibactin biosynthetic gene cluster (100% of genes show similarity) | 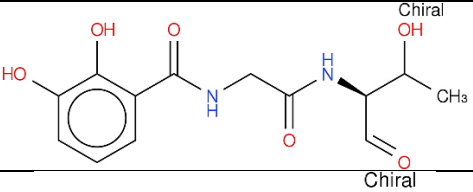 |
| Cluster 14      | Nrps             | 10159       | Surfactin biosynthetic gene cluster (8% of genes show similarity)       |  |



Table S1. Continued.

| Strain clusters | Type            | Length (bp) | Most similar known clusters                                           | Predicted core clusters                                                               |
|-----------------|-----------------|-------------|-----------------------------------------------------------------------|---------------------------------------------------------------------------------------|
| <b>B26</b>      |                 |             |                                                                       |                                                                                       |
| Cluster 1       | Transatpks      | 75787       | Difficidin biosynthetic gene cluster (86% of genes show similarity)   | 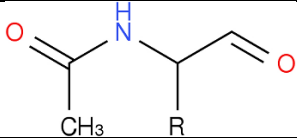   |
| Cluster 2       | T3pks           | 41109       | -                                                                     | -                                                                                     |
| Cluster 3       | Terpene         | 21883       | -                                                                     | -                                                                                     |
| Cluster 4       | Nrps            | 48404       | Plipastatin biosynthetic gene cluster (53% of genes show similarity)  |    |
| Cluster 5       | Nrps            | 24757       | -                                                                     | -                                                                                     |
| Cluster 6       | Other           | 41418       | Bacilysin biosynthetic gene cluster (100% of genes show similarity)   | -                                                                                     |
| Cluster 7       | Terpene         | 20740       | -                                                                     | -                                                                                     |
| Cluster 8       | Transatpks      | 85896       | Macrolactin biosynthetic gene cluster (100% of genes show similarity) |  |
| Cluster 9       | Nrps-Transatpks | 102689      | Bacillaene biosynthetic gene cluster (100% of genes show similarity)  |  |
| Cluster 10      | Nrps-Transatpks | 88616       | Fengycin biosynthetic gene cluster (86% of genes show similarity)     |                                                                                       |
| Cluster 11      | Nrps            | 35338       | -                                                                     | -                                                                                     |

Table S1. Continued.

| Strain clusters | Type             | Length (bp) | Most similar known clusters                                             | Predicted core clusters                                                               |
|-----------------|------------------|-------------|-------------------------------------------------------------------------|---------------------------------------------------------------------------------------|
| <b>B26</b>      |                  |             |                                                                         |                                                                                       |
| Cluster 12      | Nrps             | 37080       | Surfactin biosynthetic gene cluster (47% of genes show similarity)      | 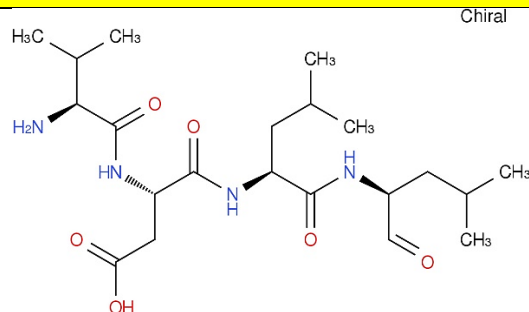   |
| Cluster 13      | Nrps             | 28237       | Surfactin biosynthetic gene cluster (47% of genes show similarity)      |    |
| Cluster 14      | Bacteriocin-Nrps | 51794       | Bacillibactin biosynthetic gene cluster (100% of genes show similarity) |   |
| Cluster 15      | Otherks          | 41244       | Butirosin biosynthetic gene cluster (7% of genes show similarity)       | -                                                                                     |
| Cluster 16      | Transatpks       | 24629       | Difficidin biosynthetic gene cluster (26% of genes show similarity)     |  |
| Cluster 17      | Nrps             | 7256        | -                                                                       | -                                                                                     |

Table S1. Continued.

| Strain clusters | Type            | Length (bp) | Most similar known clusters                                           | Predicted core clusters                                                              |
|-----------------|-----------------|-------------|-----------------------------------------------------------------------|--------------------------------------------------------------------------------------|
| <b>LS69</b>     |                 |             |                                                                       |                                                                                      |
| Cluster 1       | Nrps            | 65407       | Surfactin biosynthetic gene cluster (82% of genes show similarity)    | 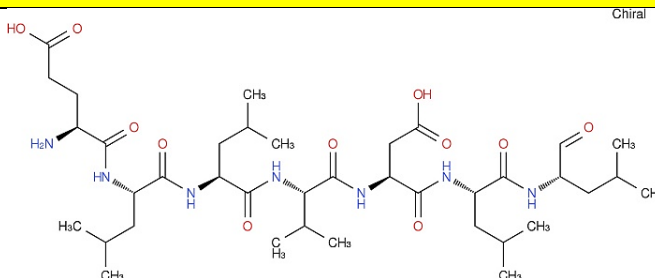  |
| Cluster 2       | Otherks         | 41244       | Butirosin biosynthetic gene cluster (7% of genes show similarity)     | -                                                                                    |
| Cluster 3       | Terpene         | 20740       | -                                                                     | -                                                                                    |
| Cluster 4       | Lantipeptide    | 28888       | -                                                                     | -                                                                                    |
| Cluster 5       | Transatpks      | 85905       | Macrolactin biosynthetic gene cluster (100% of genes show similarity) | -                                                                                    |
| Cluster 6       | Nrps-Transatpks | 102674      | Bacillaene biosynthetic gene cluster (100% of genes show similarity)  |   |
| Cluster 7       | Nrps-Transatpks | 137801      | Fengycin biosynthetic gene cluster (100% of genes show similarity)    |  |
| Cluster 8       | Terpene         | 21883       | -                                                                     | -                                                                                    |
| Cluster 9       | T3pks           | 41109       | -                                                                     | -                                                                                    |

Table S1. Continued.

| Strain clusters | Type             | Length (bp) | Most similar known clusters                                             | Predicted core clusters                                                             |
|-----------------|------------------|-------------|-------------------------------------------------------------------------|-------------------------------------------------------------------------------------|
| <b>LS69</b>     |                  |             |                                                                         |                                                                                     |
| Cluster 10      | Transatpks       | 100453      | Difficidin biosynthetic gene cluster (100% of genes show similarity)    | 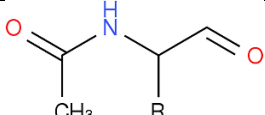 |
| Cluster 11      | Bacteriocin-Nrps | 66791       | Bacillibactin biosynthetic gene cluster (100% of genes show similarity) |  |
| Cluster 12      | Other            | 41418       | Bacilysin biosynthetic gene cluster (100% of genes show similarity)     | -                                                                                   |

Table S1. Continued.

| Strain clusters | Type            | Length (bp) | Most similar known clusters                                           | Predicted core clusters                                                               |
|-----------------|-----------------|-------------|-----------------------------------------------------------------------|---------------------------------------------------------------------------------------|
| <b>RC218</b>    |                 |             |                                                                       |                                                                                       |
| Cluster 1       | Nrps            | 65407       | Surfactin biosynthetic gene cluster (91% of genes show similarity)    | 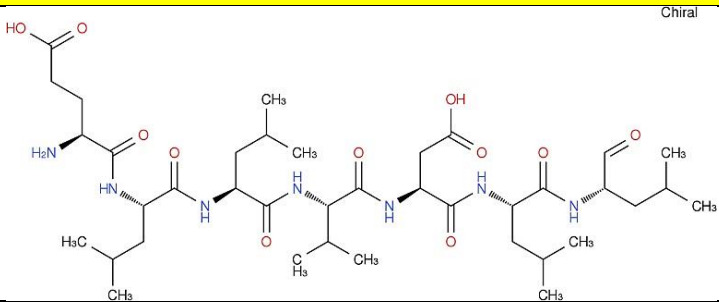   |
| Cluster 2       | Otherks         | 41244       | Butirosin biosynthetic gene cluster (7% of genes show similarity)     | -                                                                                     |
| Cluster 3       | Transatpks      | 24266       | Difficidin biosynthetic gene cluster (26% of genes show similarity)   |    |
| Cluster 4       | Transatpks-Nrps | 102695      | Bacillaene biosynthetic gene cluster (100% of genes show similarity)  |    |
| Cluster 5       | Transatpks      | 85905       | Macrolactin biosynthetic gene cluster (100% of genes show similarity) | -                                                                                     |
| Cluster 6       | Terpene         | 20740       | -                                                                     | -                                                                                     |
| Cluster 7       | Transatpks-Nrps | 88755       | Fengycin biosynthetic gene cluster (86% of genes show similarity)     |  |

Table S1. Continued.

| Strain clusters | Type             | Length (bp) | Most similar known clusters                                             | Predicted core clusters                                                               |
|-----------------|------------------|-------------|-------------------------------------------------------------------------|---------------------------------------------------------------------------------------|
| <b>RC218</b>    |                  |             |                                                                         |                                                                                       |
| Cluster 8       | Other            | 41418       | Bacilysin biosynthetic gene cluster (100% of genes show similarity)     | -                                                                                     |
| Cluster 9       | Lantipeptide     | 27056       | Subtilin biosynthetic gene cluster (100% of genes show similarity)      | -                                                                                     |
| Cluster 10      | Bacteriocin-Nrps | 51792       | Bacillibactin biosynthetic gene cluster (100% of genes show similarity) | 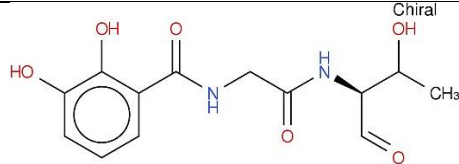   |
| Cluster 11      | Transatpks       | 28662       | Difficidin biosynthetic gene cluster (46% of genes show similarity)     |    |
| Cluster 12      | Nrps             | 49224       | Plipastatin biosynthetic gene cluster (53% of genes show similarity)    |   |
| Cluster 13      | Terpene          | 21883       | -                                                                       | -                                                                                     |
| Cluster 14      | T3pks            | 41109       | -                                                                       | -                                                                                     |
| Cluster 15      | Transatpks       | 46720       | Difficidin biosynthetic gene cluster (53% of genes show similarity)     |  |

Table S1. Continued.

| Strain clusters | Type             | Length (bp) | Most similar known clusters                                             | Predicted core clusters                                                              |
|-----------------|------------------|-------------|-------------------------------------------------------------------------|--------------------------------------------------------------------------------------|
| <b>AP183</b>    |                  |             |                                                                         |                                                                                      |
| Cluster 1       | Bacteriocin-Nrps | 51792       | Bacillibactin biosynthetic gene cluster (100% of genes show similarity) | 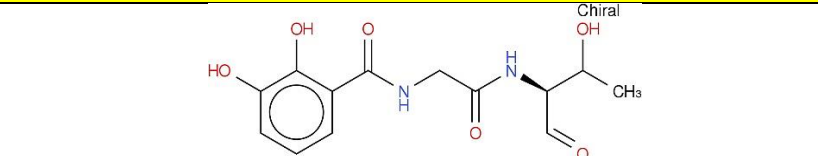  |
| Cluster 2       | Transatpks       | 75784       | Difficidin biosynthetic gene cluster (86% of genes show similarity)     |   |
| Cluster 3       | Other            | 41418       | Bacilysin biosynthetic gene cluster (100% of genes show similarity)     | -                                                                                    |
| Cluster 4       | Transatpks       | 46090       | Myxovirescin biosynthetic gene cluster (17% of genes show similarity)   |   |
| Cluster 5       | Transatpks-T1pks | 30008       | Thiomarinol biosynthetic gene cluster (5% of genes show similarity)     |   |
| Cluster 6       | Transatpks-T1pks | 102692      | Bacillaene biosynthetic gene cluster (100% of genes show similarity)    |   |
| Cluster 7       | Transatpks-T1pks | 103075      | Fengycin biosynthetic gene cluster (93% of genes show similarity)       |  |
| Cluster 8       | Transatpks       | 68255       | Macrolactin biosynthetic gene cluster (80% of genes show similarity)    | -                                                                                    |
| Cluster 9       | Terpene          | 20740       | -                                                                       | -                                                                                    |
| Cluster 10      | Otherks          | 41244       | Butirosin biosynthetic gene cluster (7% of genes show similarity)       | -                                                                                    |

Table S1. Continued.

| Strain clusters | Type       | Length (bp) | Most similar known clusters                                         | Predicted core clusters                                                               |
|-----------------|------------|-------------|---------------------------------------------------------------------|---------------------------------------------------------------------------------------|
| <b>AP183</b>    |            |             |                                                                     |                                                                                       |
| Cluster 11      | Nrps       | 25177       | Surfactin biosynthetic gene cluster (43% of genes show similarity)  | -                                                                                     |
| Cluster 12      | Nrps       | 38360       | Surfactin biosynthetic gene cluster (47% of genes show similarity)  | 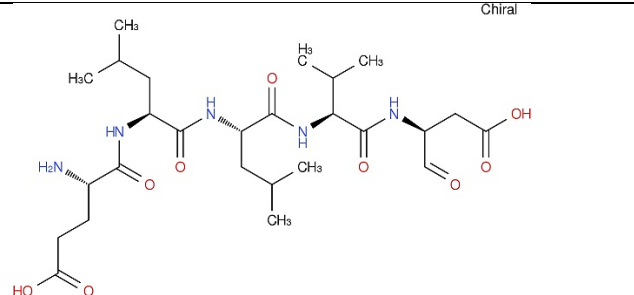   |
| Cluster 13      | Transatpks | 47375       | Difficidin biosynthetic gene cluster (26% of genes show similarity) |    |
| Cluster 14      | Nrps       | 19928       | Fengycin biosynthetic gene cluster (20% of genes show similarity)   |   |
| Cluster 15      | Transatpks | 8122        | Bryostatin biosynthetic gene cluster (80% of genes show similarity) |  |
| Cluster 16      | T3pks      | 26386       | -                                                                   | -                                                                                     |
| Cluster 17      | Terpene    | 21883       | -                                                                   | -                                                                                     |



Table S1. Continued.

| Strain clusters | Type                 | Length (bp) | Most similar known clusters                                           | Predicted core clusters                                                               |
|-----------------|----------------------|-------------|-----------------------------------------------------------------------|---------------------------------------------------------------------------------------|
| <b>G341</b>     |                      |             |                                                                       |                                                                                       |
| Cluster 5       | Nrps                 | 65407       | Surfactin biosynthetic gene cluster (91% of genes show similarity)    | 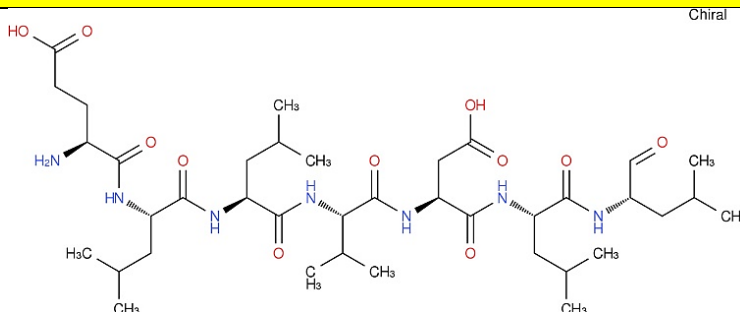   |
| Cluster 2       | Otherks              | 41244       | Butirosin biosynthetic gene cluster (7% of genes show similarity)     | -                                                                                     |
| Cluster 3       | Lantipeptide-Terpene | 45895       | -                                                                     | -                                                                                     |
| Cluster 4       | Transatpks           | 85893       | Macrolactin biosynthetic gene cluster (100% of genes show similarity) | -                                                                                     |
| Cluster 5       | Nrps-Transatpks      | 102698      | Bacillaene biosynthetic gene cluster (100% of genes show similarity)  |   |
| Cluster 6       | Nrps-Transatpks      | 139131      | Fengycin biosynthetic gene cluster (100% of genes show similarity)    |  |
| Cluster 7       | Terpene              | 21883       | -                                                                     | -                                                                                     |
| Cluster 8       | T3pks                | 41109       | -                                                                     | -                                                                                     |

Table S1. Continued.

| Strain clusters | Type             | Length (bp) | Most similar known clusters                                             | Predicted core clusters                                                             |
|-----------------|------------------|-------------|-------------------------------------------------------------------------|-------------------------------------------------------------------------------------|
| <b>G341</b>     |                  |             |                                                                         |                                                                                     |
| Cluster 9       | Transatpks       | 100450      | Difficidin biosynthetic gene cluster (100% of genes show similarity)    | 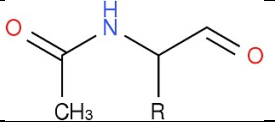 |
| Cluster 10      | Bacteriocin-Nrps | 66794       | Bacillibactin biosynthetic gene cluster (100% of genes show similarity) |  |
| Cluster 11      | Other            | 41418       | Bacilysin biosynthetic gene cluster (100% of genes show similarity)     | -                                                                                   |

Table S1. Continued.

| Strain clusters | Type            | Length (bp) | Most similar known clusters                                                                   | Predicted core clusters |
|-----------------|-----------------|-------------|-----------------------------------------------------------------------------------------------|-------------------------|
| <b>AP194</b>    |                 |             |                                                                                               |                         |
| Cluster 1       | Other           | 41418       | Bacilysin biosynthetic gene cluster (100% of genes show similarity)                           | -                       |
| Cluster 2       | Transatpks      | 85893       | Macrolactin biosynthetic gene cluster (100% of genes show similarity)                         |                         |
| Cluster 3       | Transatpks      | 45699       | Difficidin biosynthetic gene cluster (53% of genes show similarity)                           |                         |
| Cluster 4       | Lantipeptide    | 27137       | Haloduracin alpha / haloduracin beta biosynthetic gene cluster (40% of genes show similarity) | -                       |
| Cluster 5       | Transatpks-Nrps | 85704       | Bacillaene biosynthetic gene cluster (100% of genes show similarity)                          |                         |
| Cluster 6       | T3pks           | 41100       | -                                                                                             | -                       |
| Cluster 7       | Nrps            | 23938       | Plipastatin biosynthetic gene cluster (46% of genes show similarity)                          | -                       |
| Cluster 8       | Terpene         | 21883       | -                                                                                             | -                       |
| Cluster 9       | Transatpks      | 30074       | Difficidin biosynthetic gene cluster (46% of genes show similarity)                           |                         |
| Cluster 10      | Transatpks      | 24406       | Difficidin biosynthetic gene cluster (26% of genes show similarity)                           |                         |
| Cluster 11      | Nrps            | 13196       | Fengycin biosynthetic gene cluster (20% of genes show similarity)                             |                         |

Table S1. Continued.

| Strain clusters | Type             | Length (bp) | Most similar known clusters                                             | Predicted core clusters                                                                             |
|-----------------|------------------|-------------|-------------------------------------------------------------------------|-----------------------------------------------------------------------------------------------------|
| <b>AP194</b>    |                  |             |                                                                         |                                                                                                     |
| Cluster 12      | Nrps             | 9648        | Fengycin biosynthetic gene cluster (13% of genes show similarity)       | 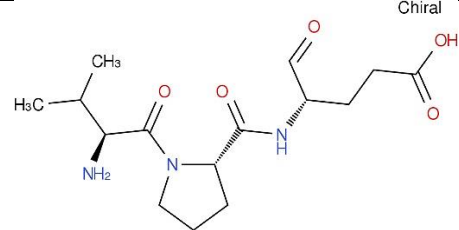 <p>Chiral</p>   |
| Cluster 13      | Transatpks-Nrps  | 77730       | Rhizoctin biosynthetic gene cluster (16% of genes show similarity)      |  <p>Chiral</p>   |
| Cluster 14      | Nrps             | 65413       | Surfactin biosynthetic gene cluster (91% of genes show similarity)      |  <p>Chiral</p>  |
| Cluster 15      | Otherks          | 41244       | Butirosin biosynthetic gene cluster (7% of genes show similarity)       | -                                                                                                   |
| Cluster 16      | Terpene          | 20740       | -                                                                       | -                                                                                                   |
| Cluster 17      | Bacteriocin-Nrps | 66789       | Bacillibactin biosynthetic gene cluster (100% of genes show similarity) |  <p>Chiral</p> |

Table S1. Continued.

| Strain clusters | Type                | Length (bp) | Most similar known clusters                                       | Predicted core clusters                                                             |
|-----------------|---------------------|-------------|-------------------------------------------------------------------|-------------------------------------------------------------------------------------|
| <b>AP194</b>    |                     |             |                                                                   |                                                                                     |
| Cluster 18      | Nrps-<br>Transatpks | 87890       | Fengycin biosynthetic gene cluster (80% of genes show similarity) | 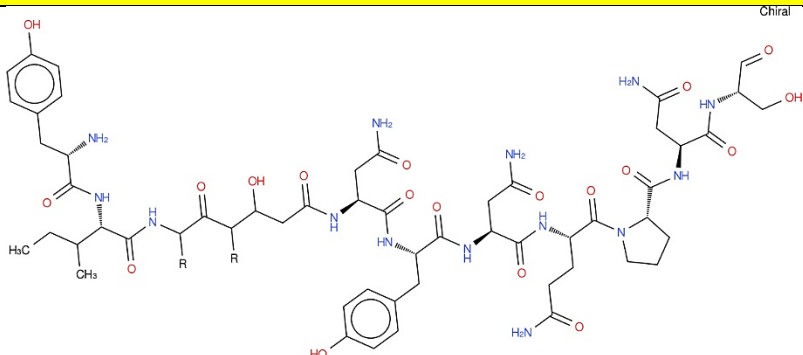 |

Table S1. Continued.

| Strain clusters | Type            | Length (bp) | Most similar known clusters                                           | Predicted core clusters                                                               |
|-----------------|-----------------|-------------|-----------------------------------------------------------------------|---------------------------------------------------------------------------------------|
| <b>B25</b>      |                 |             |                                                                       |                                                                                       |
| Cluster 1       | Nrps            | 65407       | Surfactin biosynthetic gene cluster (78% of genes show similarity)    | 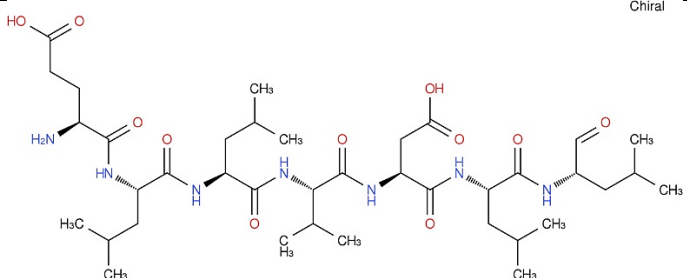   |
| Cluster 2       | Thiopeptide     | 45069       | Kijanamicin biosynthetic gene cluster (4% of genes show similarity)   | -                                                                                     |
| Cluster 3       | Otherks         | 41244       | Butirosin biosynthetic gene cluster (7% of genes show similarity)     | -                                                                                     |
| Cluster 4       | Terpene         | 20740       | -                                                                     | -                                                                                     |
| Cluster 5       | Lantipeptide    | 28676       | -                                                                     | -                                                                                     |
| Cluster 6       | Transatpks      | 85869       | Macrolactin biosynthetic gene cluster (100% of genes show similarity) | -                                                                                     |
| Cluster 7       | Transatpks-Nrps | 102704      | Bacillaene biosynthetic gene cluster (100% of genes show similarity)  |   |
| Cluster 8       | Transatpks-Nrps | 137827      | Fengycin biosynthetic gene cluster (100% of genes show similarity)    |  |

Table S1. Continued.

| Strain clusters | Type             | Length (bp) | Most similar known clusters                                             | Predicted core clusters                                                             |
|-----------------|------------------|-------------|-------------------------------------------------------------------------|-------------------------------------------------------------------------------------|
| <b>B25</b>      |                  |             |                                                                         |                                                                                     |
| Cluster 9       | Terpene          | 21883       | -                                                                       | -                                                                                   |
| Cluster 10      | T3pks            | 41109       | -                                                                       | -                                                                                   |
| Cluster 11      | Transatpks       | 100438      | Difficidin biosynthetic gene cluster (100% of genes show similarity)    | 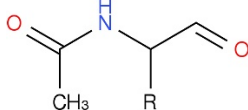 |
| Cluster 12      | Bacteriocin-Nrps | 66792       | Bacillibactin biosynthetic gene cluster (100% of genes show similarity) |  |
| Cluster 13      | Other            | 41418       | Bacilysin biosynthetic gene cluster (100% of genes show similarity)     | -                                                                                   |

Table S1. Continued.

| Strain clusters | Type            | Length (bp) | Most similar known clusters                                           | Predicted core clusters                                                               |
|-----------------|-----------------|-------------|-----------------------------------------------------------------------|---------------------------------------------------------------------------------------|
| <b>D2-2</b>     |                 |             |                                                                       |                                                                                       |
| Cluster 1       | Nrps            | 65407       | Surfactin biosynthetic gene cluster (82% of genes show similarity)    | 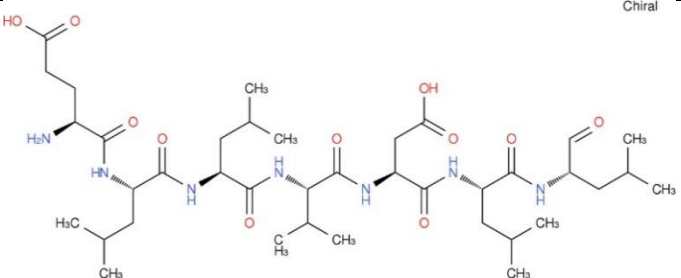   |
| Cluster 2       | Otherks         | 41244       | Butirosin biosynthetic gene cluster (7% of genes show similarity)     | -                                                                                     |
| Cluster 3       | Terpene         | 20740       | -                                                                     | -                                                                                     |
| Cluster 4       | Transatpks      | 85887       | Macrolactin biosynthetic gene cluster (100% of genes show similarity) | -                                                                                     |
| Cluster 5       | Transatpks-Nrps | 102698      | Bacillaene biosynthetic gene cluster (100% of genes show similarity)  |    |
| Cluster 6       | Transatpks-Nrps | 137962      | Fengycin biosynthetic gene cluster (100% of genes show similarity)    |   |
| Cluster 7       | Terpene         | 21883       | -                                                                     | -                                                                                     |
| Cluster 8       | T3pks           | 41100       | -                                                                     | -                                                                                     |
| Cluster 9       | Transatpks      | 98975       | Difficidin biosynthetic gene cluster (100% of genes show similarity)  |  |



Table S1. Continued.

| Strain clusters | Type             | Length (bp) | Most similar known clusters                                            | Predicted core clusters                                                             |
|-----------------|------------------|-------------|------------------------------------------------------------------------|-------------------------------------------------------------------------------------|
| <b>D2-2</b>     |                  |             |                                                                        |                                                                                     |
| Cluster 10      | Bacteriocin-Nrps | 66796       | Bacillibactin biosynthetic genecluster (100% of genes show similarity) | 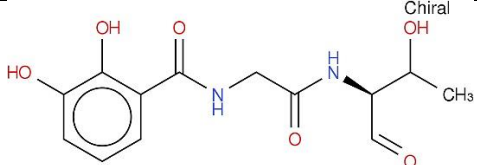 |
| Cluster 11      | Other            | 41418       | Bacilysin biosynthetic gene cluster (100% of genes show similarity)    | -                                                                                   |
| Cluster 12      | Thiopeptide      | 29487       | -                                                                      | -                                                                                   |

Table S1. Continued.

| Strain clusters   | Type            | Length (bp) | Most similar known clusters                                           | Predicted core clusters                                                               |
|-------------------|-----------------|-------------|-----------------------------------------------------------------------|---------------------------------------------------------------------------------------|
| <b>KACC 18228</b> |                 |             |                                                                       |                                                                                       |
| Cluster 1         | Transatpks-Nrps | 88593       | Fengycin biosynthetic gene cluster (86% of genes show similarity)     | 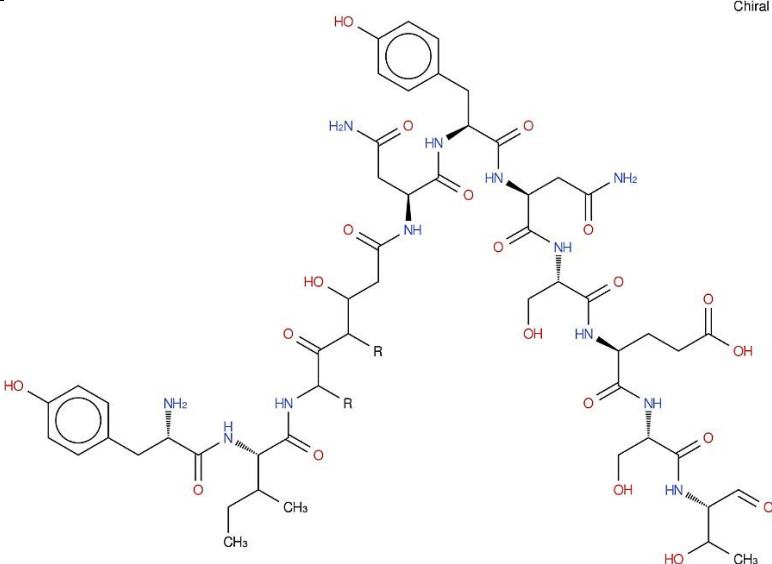   |
| Cluster 2         | Transatpks-Nrps | 102686      | Bacillaene biosynthetic gene cluster (100% of genes show similarity)  |    |
| Cluster 3         | Transatpks      | 85907       | Macrolactin biosynthetic gene cluster (100% of genes show similarity) |   |
| Cluster 4         | Nrps            | 14235       | Fengycin biosynthetic gene cluster (26% of genes show similarity)     |  |

Table S1. Continued.

| Strain clusters   | Type                     | Length (bp) | Most similar known clusters                                             | Predicted core clusters                                                               |
|-------------------|--------------------------|-------------|-------------------------------------------------------------------------|---------------------------------------------------------------------------------------|
| <b>KACC 18228</b> |                          |             |                                                                         |                                                                                       |
| Cluster 5         | Bacteriocin-Nrps         | 66794       | Bacillibactin biosynthetic gene cluster (100% of genes show similarity) | 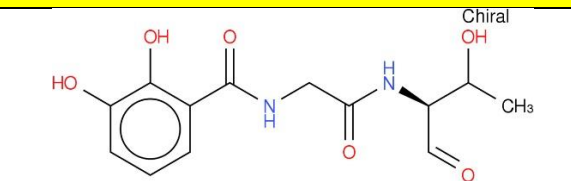   |
| Cluster 6         | Transatpks               | 46832       | Difficidin biosynthetic gene cluster (53% of genes show similarity)     |    |
| Cluster 7         | Otherks                  | 41244       | Butirosin biosynthetic gene cluster (7% of genes show similarity)       | -                                                                                     |
| Cluster 8         | Terpene                  | 20740       | -                                                                       | -                                                                                     |
| Cluster 9         | Nrps                     | 11190       | Fengycin biosynthetic gene cluster (20% of genes show similarity)       |    |
| Cluster 10        | Other                    | 41418       | Bacilysin biosynthetic gene cluster (100% of genes show similarity)     | -                                                                                     |
| Cluster 11        | Transatpks               | 53381       | Difficidin biosynthetic gene cluster (60% of genes show similarity)     |  |
| Cluster 12        | T3pks                    | 41109       | -                                                                       | -                                                                                     |
| Cluster 13        | Nrps                     | 22464       | Plipastatin biosynthetic gene cluster (30% of genes show similarity)    | -                                                                                     |
| Cluster 14        | Thiopeptide-Lantipeptide | 26819       | -                                                                       | -                                                                                     |

Table S1. Continued.

| Strain clusters   | Type | Length (bp) | Most similar known clusters                                        | Predicted core clusters                                                                           |
|-------------------|------|-------------|--------------------------------------------------------------------|---------------------------------------------------------------------------------------------------|
| <b>KACC 18228</b> |      |             |                                                                    |                                                                                                   |
| Cluster 15        | Nrps | 65410       | Surfactin biosynthetic gene cluster (82% of genes show similarity) | 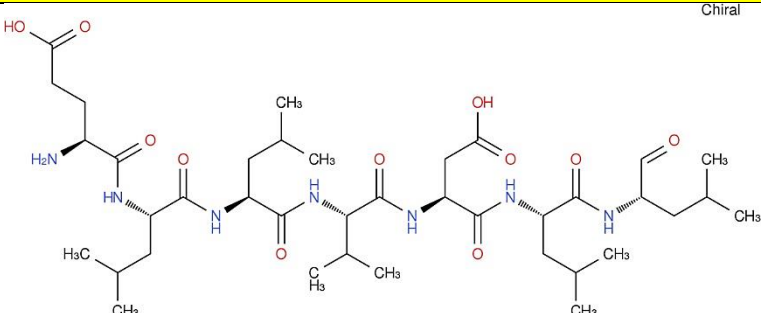 <p>Chiral</p> |

Table S1. Continued.

| Strain clusters | Type            | Length (bp) | Most similar known clusters                                           | Predicted core clusters                                                              |
|-----------------|-----------------|-------------|-----------------------------------------------------------------------|--------------------------------------------------------------------------------------|
| <b>S3-1</b>     |                 |             |                                                                       |                                                                                      |
| Cluster 1       | Nrps            | 65407       | Surfactin biosynthetic gene cluster (82% of genes show similarity)    | 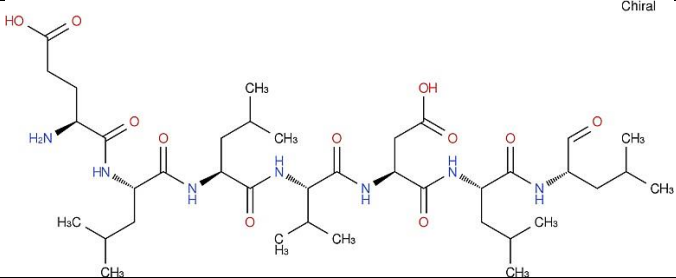  |
| Cluster 2       | Otherks         | 41244       | Butirosin biosynthetic gene cluster (7% of genes show similarity)     | -                                                                                    |
| Cluster 3       | Terpene         | 20740       | -                                                                     | -                                                                                    |
| Cluster 4       | Lantipeptide    | 28888       | -                                                                     | -                                                                                    |
| Cluster 5       | Transatpks      | 85905       | Macrolactin biosynthetic gene cluster (100% of genes show similarity) | -                                                                                    |
| Cluster 6       | Transatpks-Nrps | 102674      | Bacillaene biosynthetic gene cluster (100% of genes show similarity)  |   |
| Cluster 7       | Transatpks-Nrps | 137801      | Fengycin biosynthetic gene cluster (100% of genes show similarity)    |  |
| Cluster 8       | Terpene         | 21883       | -                                                                     | -                                                                                    |
| Cluster 9       | T3pks           | 41109       | -                                                                     | -                                                                                    |

Table S1. Continued.

| Strain clusters | Type             | Length (bp) | Most similar known clusters                                             | Predicted core clusters                                                             |
|-----------------|------------------|-------------|-------------------------------------------------------------------------|-------------------------------------------------------------------------------------|
| <b>S3-1</b>     |                  |             |                                                                         |                                                                                     |
| Cluster 10      | Transatpks       | 100453      | Difficidin biosynthetic gene cluster (100% of genes show similarity)    | 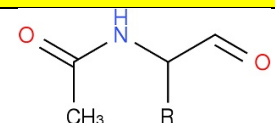 |
| Cluster 18      | Bacteriocin-Nrps | 66791       | Bacillibactin biosynthetic gene cluster (100% of genes show similarity) |  |
| Cluster 19      | Other            | 41418       | Bacilysin biosynthetic gene cluster (100% of genes show similarity)     | -                                                                                   |

Table S1. Continued.

| Strain clusters | Type             | Length (bp) | Most similar known clusters                                             | Predicted core clusters                                                               |
|-----------------|------------------|-------------|-------------------------------------------------------------------------|---------------------------------------------------------------------------------------|
| <b>NBIF-003</b> |                  |             |                                                                         |                                                                                       |
| Cluster 1       | Nrps-Transatpks  | 114892      | Fengycin biosynthetic gene cluster (93% of genes show similarity)       | 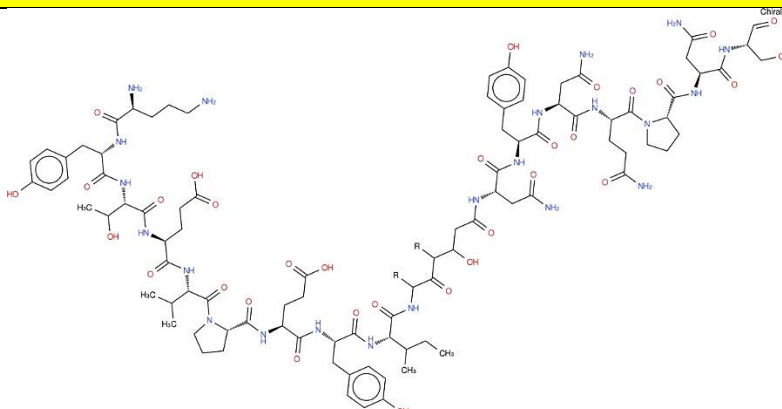   |
| Cluster 2       | Transatpks-Nrps  | 102674      | Bacillaene biosynthetic gene cluster (100% of genes show similarity)    |    |
| Cluster 3       | Transatpks       | 85905       | Macrolactin biosynthetic gene cluster (100% of genes show similarity)   |    |
| Cluster 4       | Transatpks       | 100453      | Difficidin biosynthetic gene cluster (100% of genes show similarity)    |   |
| Cluster 5       | T3pks            | 41109       | -                                                                       | -                                                                                     |
| Cluster 6       | Terpene          | 21883       | -                                                                       | -                                                                                     |
| Cluster 7       | Nrps             | 22957       | Plipastatin biosynthetic gene cluster (30% of genes show similarity)    | -                                                                                     |
| Cluster 8       | Bacteriocin-Nrps | 51791       | Bacillibactin biosynthetic gene cluster (100% of genes show similarity) |  |
| Cluster 9       | Other            | 41418       | Bacilysin biosynthetic gene cluster (100% of genes show similarity)     | -                                                                                     |

Table S1. Continued.

| Strain clusters | Type         | Length (bp) | Most similar known clusters                                        | Predicted core clusters                                                             |
|-----------------|--------------|-------------|--------------------------------------------------------------------|-------------------------------------------------------------------------------------|
| <b>NBIF-003</b> |              |             |                                                                    |                                                                                     |
| Cluster 10      | Nrps         | 65407       | Surfactin biosynthetic gene cluster (82% of genes show similarity) | 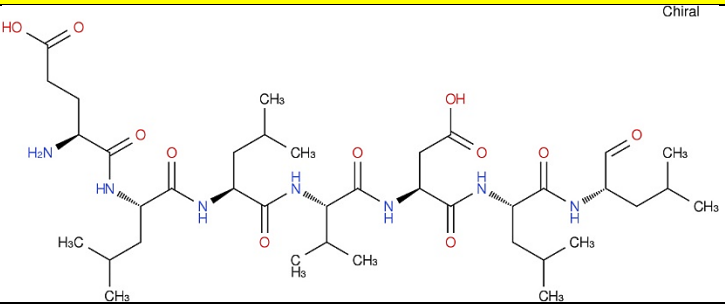 |
| Cluster 11      | Otherks      | 41244       | Butirosin biosynthetic gene cluster (7% of genes show similarity)  | -                                                                                   |
| Cluster 12      | Terpene      | 20740       | -                                                                  | -                                                                                   |
| Cluster 13      | Lantipeptide | 28888       | -                                                                  | -                                                                                   |



Table S1. Continued.

| Strain clusters | Type            | Length (bp) | Most similar known clusters                                         | Predicted core clusters                                                                             |
|-----------------|-----------------|-------------|---------------------------------------------------------------------|-----------------------------------------------------------------------------------------------------|
| <b>AP214</b>    |                 |             |                                                                     |                                                                                                     |
| Cluster 1       | Transatpks      | 53090       | Difficidin biosynthetic gene cluster (60% of genes show similarity) | 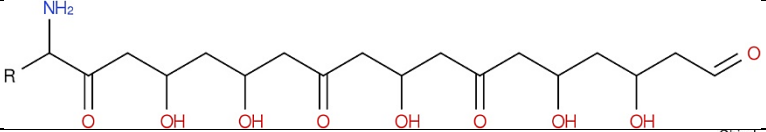 <p>Chiral</p>   |
| Cluster 2       | Transatpks-Nrps | 77735       | Rhizoctin biosynthetic gene cluster (22% of genes show similarity)  |  <p>Chiral</p>   |
| Cluster 3       | Transatpks-Nrps | 87728       | Fengycin biosynthetic gene cluster (80% of genes show similarity)   |  <p>Chiral</p>  |
| Cluster 4       | Nrps            | 36551       | Surfactin biosynthetic gene cluster (47% of genes show similarity)  |  <p>Chiral</p> |

Table S1. Continued.

| Strain clusters | Type            | Length (bp) | Most similar known clusters                                             | Predicted core clusters                                                               |
|-----------------|-----------------|-------------|-------------------------------------------------------------------------|---------------------------------------------------------------------------------------|
| <b>AP214</b>    |                 |             |                                                                         |                                                                                       |
| Cluster 5       | Nrps            | 41963       | Bacillibactin biosynthetic gene cluster (100% of genes show similarity) | 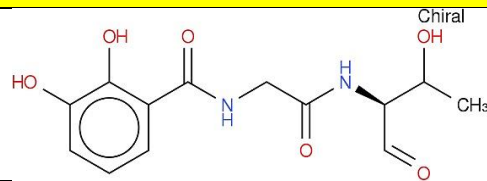   |
| Cluster 6       | Nrps            | 37288       | Plipastatin biosynthetic gene cluster (46% of genes show similarity)    |    |
| Cluster 7       | Transatpks      | 45022       | Difficidin biosynthetic gene cluster (46% of genes show similarity)     | -                                                                                     |
| Cluster 8       | T3pks           | 41109       | -                                                                       | -                                                                                     |
| Cluster 9       | Terpene         | 21883       | -                                                                       | -                                                                                     |
| Cluster 10      | Nrps            | 27924       | Surfactin biosynthetic gene cluster (47% of genes show similarity)      |  |
| Cluster 11      | Transatpks-Nrps | 102683      | Bacillaene biosynthetic gene cluster (100% of genes show similarity)    |  |

Table S1. Continued.

| Strain clusters | Type       | Length (bp) | Most similar known clusters                                           | Predicted core clusters                                                               |
|-----------------|------------|-------------|-----------------------------------------------------------------------|---------------------------------------------------------------------------------------|
| <b>AP214</b>    |            |             |                                                                       |                                                                                       |
| Cluster 12      | Nrps       | 9651        | Fengycin biosynthetic gene cluster (20% of genes show similarity)     | 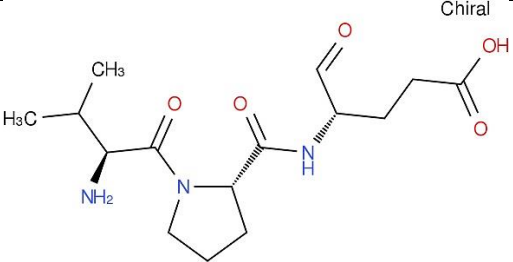   |
| Cluster 13      | Terpene    | 20740       | -                                                                     | -                                                                                     |
| Cluster 14      | Otherks    | 41244       | Butirosin biosynthetic gene cluster (7% of genes show similarity)     | -                                                                                     |
| Cluster 15      | Nrps       | 84176       | Bacilysin biosynthetic gene cluster (100% of genes show similarity)   |   |
| Cluster 16      | Transatpks | 85888       | Macrolactin biosynthetic gene cluster (100% of genes show similarity) |  |

Table S1. Continued.

| Strain clusters | Type            | Length (bp) | Most similar known clusters                                           | Predicted core clusters                                                              |
|-----------------|-----------------|-------------|-----------------------------------------------------------------------|--------------------------------------------------------------------------------------|
| <b>JS25R</b>    |                 |             |                                                                       |                                                                                      |
| Cluster 1       | Nrps            | 65407       | Surfactin biosynthetic gene cluster (82% of genes show similarity)    | 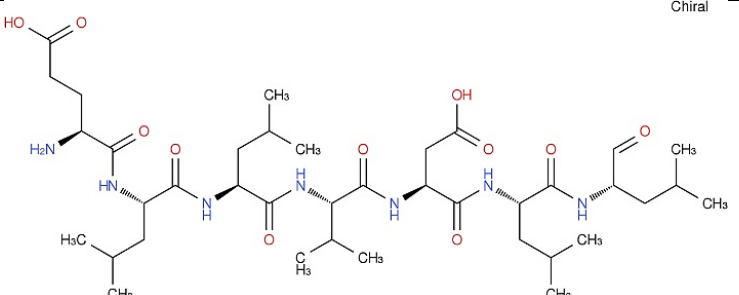  |
| Cluster 2       | Phosphonate     | 40902       | -                                                                     | -                                                                                    |
| Cluster 3       | Otherks         | 41244       | Butirosin biosynthetic gene cluster (7% of genes show similarity)     | -                                                                                    |
| Cluster 4       | Terpene         | 20740       | -                                                                     | -                                                                                    |
| Cluster 5       | Transatpks      | 85899       | Macrolactin biosynthetic gene cluster (100% of genes show similarity) | -                                                                                    |
| Cluster 6       | Nrps-Transatpks | 102683      | Bacillaene biosynthetic gene cluster (100% of genes show similarity)  |   |
| Cluster 7       | Nrps-Transatpks | 137830      | Fengycin biosynthetic gene cluster (100% of genes show similarity)    |  |
| Cluster 8       | Terpene         | 21883       | -                                                                     | -                                                                                    |
| Cluster 9       | T3pks           | 41109       | -                                                                     | -                                                                                    |

Table S1. Continued.

| Strain clusters | Type             | Length (bp) | Most similar known clusters                                             | Predicted core clusters                                                             |
|-----------------|------------------|-------------|-------------------------------------------------------------------------|-------------------------------------------------------------------------------------|
| <b>JS25R</b>    |                  |             |                                                                         |                                                                                     |
| Cluster 10      | Transatpks       | 100444      | Difficidin biosynthetic gene cluster (100% of genes show similarity)    | 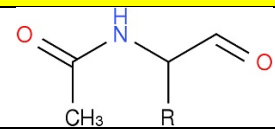 |
| Cluster 11      | Bacteriocin-Nrps | 66795       | Bacillibactin biosynthetic gene cluster (100% of genes show similarity) |  |
| Cluster 12      | Nrps             | 65342       | -                                                                       | -                                                                                   |
| Cluster 13      | Other            | 41418       | Bacilysin biosynthetic gene cluster (100% of genes show similarity)     | -                                                                                   |

Table S1. Continued.

| Strain clusters | Type            | Length (bp) | Most similar known clusters                                           | Predicted core clusters                                                              |
|-----------------|-----------------|-------------|-----------------------------------------------------------------------|--------------------------------------------------------------------------------------|
| <b>UCMB5036</b> |                 |             |                                                                       |                                                                                      |
| Cluster 1       | Nrps            | 65407       | Surfactin biosynthetic gene cluster (91% of genes show similarity)    | 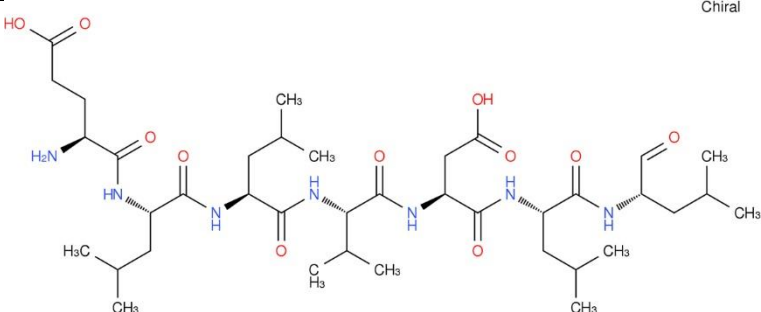  |
| Cluster 2       | Otherks         | 41244       | Butirosin biosynthetic gene cluster (7% of genes show similarity)     | -                                                                                    |
| Cluster 3       | Terpene         | 20740       | -                                                                     | -                                                                                    |
| Cluster 4       | Transatpks      | 85881       | Macrolactin biosynthetic gene cluster (100% of genes show similarity) | -                                                                                    |
| Cluster 5       | Transatpks-Nrps | 102392      | Bacillaene biosynthetic gene cluster (100% of genes show similarity)  |   |
| Cluster 6       | Transatpks-Nrps | 137815      | Fengycin biosynthetic gene cluster (100% of genes show similarity)    |  |
| Cluster 7       | Terpene         | 21883       | -                                                                     | -                                                                                    |
| Cluster 8       | T3pks           | 41100       | -                                                                     | -                                                                                    |

Table S1. Continued.

| Strain clusters | Type             | Length (bp) | Most similar known clusters                                             | Predicted core clusters                                                             |
|-----------------|------------------|-------------|-------------------------------------------------------------------------|-------------------------------------------------------------------------------------|
| <b>UCMB5036</b> |                  |             |                                                                         |                                                                                     |
| Cluster 9       | Transatpks       | 100447      | Difficidin biosynthetic gene cluster (100% of genes show similarity)    | 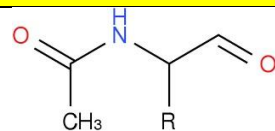 |
| Cluster 10      | Bacteriocin-Nrps | 66791       | Bacillibactin biosynthetic gene cluster (100% of genes show similarity) |  |
| Cluster 11      | Nrps             | 44115       | -                                                                       | -                                                                                   |
| Cluster 12      | Other            | 41418       | Bacilysin biosynthetic gene cluster (100% of genes show similarity)     | -                                                                                   |

Table S1. Continued.

| Strain clusters | Type            | Length (bp) | Most similar known clusters                                           | Predicted core clusters                                                              |
|-----------------|-----------------|-------------|-----------------------------------------------------------------------|--------------------------------------------------------------------------------------|
| <b>SB1216</b>   |                 |             |                                                                       |                                                                                      |
| Cluster 1       | Nrps            | 65407       | Surfactin biosynthetic gene cluster (91% of genes show similarity)    | 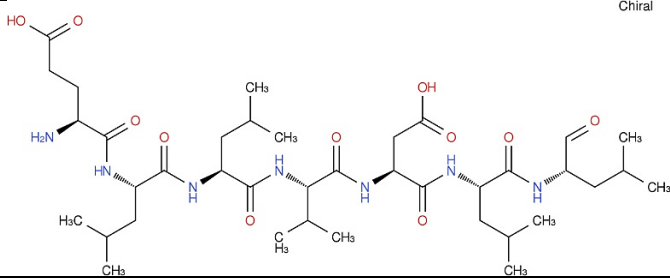  |
| Cluster 2       | Otherks         | 41244       | Butirosin biosynthetic gene cluster (7% of genes show similarity)     | -                                                                                    |
| Cluster 3       | Terpene         | 20740       | -                                                                     | -                                                                                    |
| Cluster 4       | Transatpks      | 83565       | Macrolactin biosynthetic gene cluster (100% of genes show similarity) | -                                                                                    |
| Cluster 5       | Nrps-Transatpks | 102692      | Bacillaene biosynthetic gene cluster (100% of genes show similarity)  |   |
| Cluster 6       | Nrps-Transatpks | 13172       | Fengycin biosynthetic gene cluster (100% of genes show similarity)    |  |
| Cluster 7       | Other           | 41418       | Bacilysin biosynthetic gene cluster (85% of genes show similarity)    | -                                                                                    |
| Cluster 8       | T3pks           | 41109       | -                                                                     | -                                                                                    |



Table S1. Continued.

| Strain clusters | Type             | Length (bp) | Most similar known clusters                                             | Predicted core clusters                                                             |
|-----------------|------------------|-------------|-------------------------------------------------------------------------|-------------------------------------------------------------------------------------|
| <b>SB1216</b>   |                  |             |                                                                         |                                                                                     |
| Cluster 9       | Transatpks       | 100456      | Difficidin biosynthetic gene cluster (100% of genes show similarity)    | 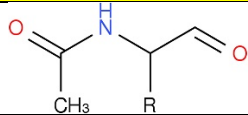 |
| Cluster 10      | Bacteriocin-Nrps | 66792       | Bacillibactin biosynthetic gene cluster (100% of genes show similarity) |  |
| Cluster 11      | Terpene          | 21883       | Bacillibactin biosynthetic gene cluster (100% of genes show similarity) |  |

Table S1. Continued.

| Strain clusters | Type                                | Length (bp) | Most similar known clusters                                           | Predicted core clusters                                                               |
|-----------------|-------------------------------------|-------------|-----------------------------------------------------------------------|---------------------------------------------------------------------------------------|
| <b>CC09</b>     |                                     |             |                                                                       |                                                                                       |
| Cluster 1       | Nrps-<br>Transatpks-<br>Bacteriocin | 128301      | Fengycin biosynthetic gene cluster (93% of genes show similarity)     | 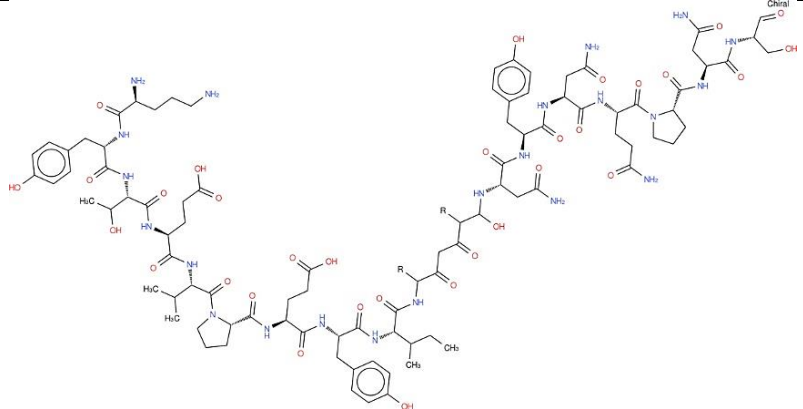   |
| Cluster 2       | Transatpks-<br>Nrps                 | 102683      | Bacillaene biosynthetic gene cluster (100% of genes show similarity)  |    |
| Cluster 3       | Transatpks                          | 85887       | Macrolactin biosynthetic gene cluster (100% of genes show similarity) | -                                                                                     |
| Cluster 4       | Terpene                             | 20740       | -                                                                     | -                                                                                     |
| Cluster 5       | Otherks                             | 41244       | Butirosin biosynthetic gene cluster (7% of genes show similarity)     | -                                                                                     |
| Cluster 6       | Nrps                                | 65407       | Surfactin biosynthetic gene cluster (91% of genes show similarity)    |  |

Table S1. Continued.

| Strain clusters | Type             | Length (bp) | Most similar known clusters                                             | Predicted core clusters                                                              |
|-----------------|------------------|-------------|-------------------------------------------------------------------------|--------------------------------------------------------------------------------------|
| <b>CC09</b>     |                  |             |                                                                         |                                                                                      |
| Cluster 7       | Transatpks-Nrps  | 77757       | Rhizoctin biosynthetic gene cluster (22% of genes show similarity)      | 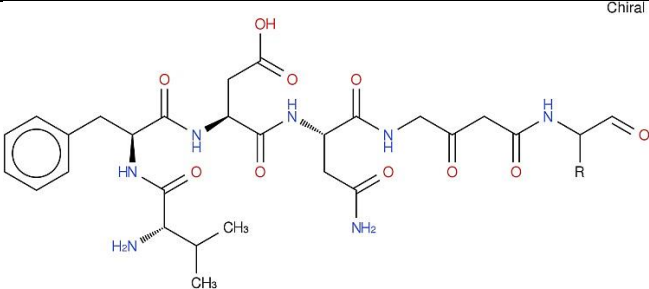  |
| Cluster 8       | Other            | 41418       | Bacilysin biosynthetic gene cluster (85% of genes show similarity)      | -                                                                                    |
| Cluster 9       | Nrps             | 60005       | -                                                                       | -                                                                                    |
| Cluster 10      | Bacteriocin-Nrps | 51794       | Bacillibactin biosynthetic gene cluster (100% of genes show similarity) |   |
| Cluster 11      | Transatpks       | 100450      | Difficidin biosynthetic gene cluster (100% of genes show similarity)    |  |
| Cluster 12      | T3pks            | 41109       | -                                                                       | -                                                                                    |
| Cluster 13      | Terpene          | 21883       | -                                                                       | -                                                                                    |
| Cluster 14      | Nrps             | 22720       | Plipastatin biosynthetic gene cluster (30% of genes show similarity)    | -                                                                                    |

Table S1. Continued.

| Strain clusters    | Type             | Length (bp) | Most similar known clusters                                            | Predicted core clusters                                                               |
|--------------------|------------------|-------------|------------------------------------------------------------------------|---------------------------------------------------------------------------------------|
| <b>CFSAN034338</b> |                  |             |                                                                        |                                                                                       |
| Cluster 1          | Terpene          | 13634       | -                                                                      | -                                                                                     |
| Cluster 2          | Terpene          | 29871       | -                                                                      | -                                                                                     |
| Cluster 3          | Otherks          | 41244       | Butirosin biosynthetic gene cluster (7% of genes show similarity)      | -                                                                                     |
| Cluster 4          | Transatpks       | 68716       | Macrolactin biosynthetic gene cluster (100% of genes show similarity)  | 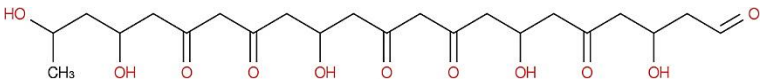   |
| Cluster 5          | Transatpks-Nrps  | 59131       | Bacillaene biosynthetic gene cluster (85% of genes show similarity)    |    |
| Cluster 6          | Other            | 41418       | Bacilysin biosynthetic gene cluster (100% of genes show similarity)    | -                                                                                     |
| Cluster 7          | Transatpks       | 28165       | Difficidin biosynthetic gene cluster (46% of genes show similarity)    |    |
| Cluster 8          | Nrps             | 25179       | Surfactin biosynthetic gene cluster (43% of genes show similarity)     | -                                                                                     |
| Cluster 9          | Bacteriocin-Nrps | 26509       | Bacillibactin biosynthetic gene cluster (76% of genes show similarity) | -                                                                                     |
| Cluster 10         | T3pks            | 23877       | -                                                                      | -                                                                                     |
| Cluster 11         | Nrps             | 27595       | Surfactin biosynthetic gene cluster (47% of genes show similarity)     |  |
| Cluster 12         | Transatpks       | 22682       | Difficidin biosynthetic gene cluster (26% of genes show similarity)    |  |
| Cluster 13         | Transatpks       | 39780       | Bacillaene biosynthetic gene cluster (21% of genes show similarity)    |  |

Table S1. Continued.

| Strain clusters    | Type            | Length (bp) | Most similar known clusters                                            | Predicted core clusters                                                               |
|--------------------|-----------------|-------------|------------------------------------------------------------------------|---------------------------------------------------------------------------------------|
| <b>CFSAN034338</b> |                 |             |                                                                        |                                                                                       |
| Cluster 14         | Transatpks-Nrps | 76026       | Bacillomycin biosynthetic gene cluster (100% of genes show similarity) | 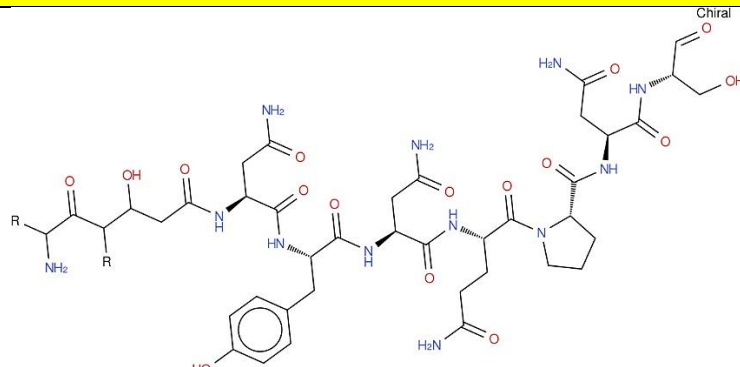   |
| Cluster 15         | Nrps            | 13938       | Fengycin biosynthetic gene cluster (20% of genes show similarity)      |    |
| Cluster 16         | Nrps            | 9325        | Fengycin biosynthetic gene cluster (13% of genes show similarity)      |   |
| Cluster 17         | Nrps            | 8901        | Surfactin biosynthetic gene cluster (8% of genes show similarity)      |  |

Table S1. Continued.

| Strain clusters    | Type       | Length (bp) | Most similar known clusters                                            | Predicted core clusters |
|--------------------|------------|-------------|------------------------------------------------------------------------|-------------------------|
| <b>CFSAN034338</b> |            |             |                                                                        |                         |
| Cluster 18         | Nrps       | 7875        | Fengycin biosynthetic gene cluster (20% of genes show similarity)      |                         |
| Cluster 19         | Nrps       | 6339        | Bacillibactin biosynthetic gene cluster (23% of genes show similarity) |                         |
| Cluster 20         | Other      | 3125        | -                                                                      | -                       |
| Cluster 21         | Nrps       | 1906        | -                                                                      | -                       |
| Cluster 22         | Transatpks | 45630       | Difficidin biosynthetic gene cluster (53% of genes show similarity)    |                         |

Table S1. Continued.

| Strain clusters    | Type       | Length (bp) | Most similar known clusters                                          | Predicted core clusters                                                               |
|--------------------|------------|-------------|----------------------------------------------------------------------|---------------------------------------------------------------------------------------|
| <b>NRRL B-4257</b> |            |             |                                                                      |                                                                                       |
| Cluster 1          | Transatpks | 100453      | Difficidin biosynthetic gene cluster (100% of genes show similarity) | 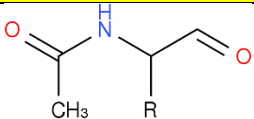   |
| Cluster 2          | T3pks      | 41109       | -                                                                    | -                                                                                     |
| Cluster 3          | Terpene    | 20740       | -                                                                    | -                                                                                     |
| Cluster 4          | Otherks    | 41244       | Butirosin biosynthetic gene cluster (7% of genes show similarity)    | -                                                                                     |
| Cluster 5          | Terpene    | 21883       | -                                                                    | -                                                                                     |
| Cluster 6          | Nrps       | 13862       | Fengycin biosynthetic gene cluster (26% of genes show similarity)    |    |
| Cluster 7          | Nrps       | 14408       | Plipastatin biosynthetic gene cluster (30% of genes show similarity) | -                                                                                     |
| Cluster 8          | Nrps       | 8922        | Surfactin biosynthetic gene cluster (8% of genes show similarity)    |  |
| Cluster 9          | Nrps       | 27617       | Surfactin biosynthetic gene cluster (47% of genes show similarity)   |  |

Table S1. Continued.

| Strain clusters    | Type            | Length (bp) | Most similar known clusters                                           | Predicted core clusters                                                              |
|--------------------|-----------------|-------------|-----------------------------------------------------------------------|--------------------------------------------------------------------------------------|
| <b>NRRL B-4257</b> |                 |             |                                                                       |                                                                                      |
| Cluster 10         | Nrps            | 11967       | Fengycin biosynthetic gene cluster (20% of genes show similarity)     | 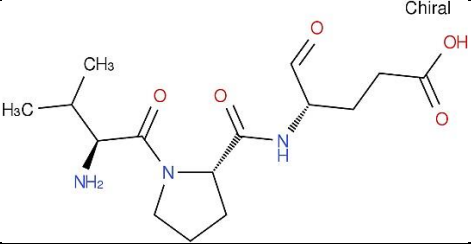  |
| Cluster 11         | Nrps            | 2335        | -                                                                     | -                                                                                    |
| Cluster 12         | Nrps            | 1883        | -                                                                     | -                                                                                    |
| Cluster 13         | Nrps            | 1223        | -                                                                     | -                                                                                    |
| Cluster 14         | Phosphonate     | 40902       | -                                                                     | -                                                                                    |
| Cluster 15         | Transatpks-Nrps | 102677      | Bacillaene biosynthetic gene cluster (100% of genes show similarity)  |   |
| Cluster 16         | Transatpks      | 85902       | Macrolactin biosynthetic gene cluster (100% of genes show similarity) |   |
| Cluster 17         | Nrps            | 25178       | Surfactin biosynthetic gene cluster (39% of genes show similarity)    | -                                                                                    |
| Cluster 18         | Nrps-Transatpks | 88020       | Fengycin biosynthetic gene cluster (80% of genes show similarity)     |  |



Table S1. Continued.

| Strain clusters    | Type             | Length (bp) | Most similar known clusters                                             | Predicted core clusters                                                             |
|--------------------|------------------|-------------|-------------------------------------------------------------------------|-------------------------------------------------------------------------------------|
| <b>NRRL B-4257</b> |                  |             |                                                                         |                                                                                     |
| Cluster 19         | Nrps             | 40295       | -                                                                       | -                                                                                   |
| Cluster 20         | Other            | 41418       | Bacilysin biosynthetic gene cluster (100% of genes show similarity)     | -                                                                                   |
| Cluster 21         | Lantipeptide     | 23984       | Mersacidin biosynthetic gene cluster (100% of genes show similarity)    | -                                                                                   |
| Cluster 22         | Nrps-Bacteriocin | 66793       | Bacillibactin biosynthetic gene cluster (100% of genes show similarity) | 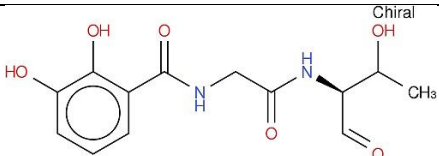 |

Table S1. Continued.

| Strain clusters     | Type            | Length (bp) | Most similar known clusters                                           | Predicted core clusters                                                                           |
|---------------------|-----------------|-------------|-----------------------------------------------------------------------|---------------------------------------------------------------------------------------------------|
| <b>YAU B9601-Y2</b> |                 |             |                                                                       |                                                                                                   |
| Cluster 1           | Nrps            | 54640       | Surfactin biosynthetic gene cluster (82% of genes show similarity)    | <p>Chiral</p> 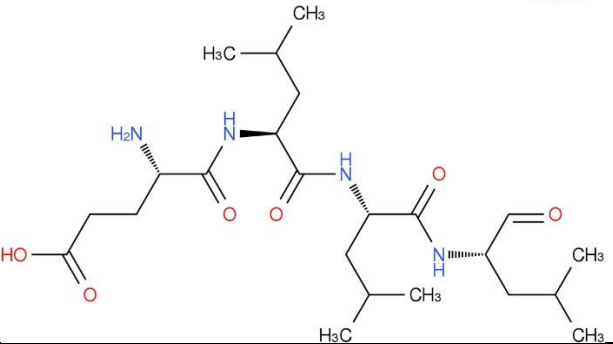 |
| Cluster 2           | Phosphonate     | 40884       | -                                                                     | -                                                                                                 |
| Cluster 3           | Otherks         | 41244       | Butirosin biosynthetic gene cluster (7% of genes show similarity)     | -                                                                                                 |
| Cluster 4           | Terpene         | 20740       | -                                                                     | -                                                                                                 |
| Cluster 5           | Transatpks      | 85902       | Macrolactin biosynthetic gene cluster (100% of genes show similarity) | -                                                                                                 |
| Cluster 6           | Transatpks-Nrps | 102680      | Bacillaene biosynthetic gene cluster (100% of genes show similarity)  |               |
| Cluster 7           | Transatpks-Nrps | 137831      | Fengycin biosynthetic gene cluster (100% of genes show similarity)    |              |

Table S1. Continued.

| Strain clusters     | Type             | Length (bp) | Most similar known clusters                                             | Predicted core clusters                                                             |
|---------------------|------------------|-------------|-------------------------------------------------------------------------|-------------------------------------------------------------------------------------|
| <b>YAU B9601-Y2</b> |                  |             |                                                                         |                                                                                     |
| Cluster 8           | Terpene          | 21883       | -                                                                       | -                                                                                   |
| Cluster 9           | T3pks            | 41100       | -                                                                       | -                                                                                   |
| Cluster 10          | Transatpks       | 100444      | Difficidin biosynthetic gene cluster (100% of genes show similarity)    | 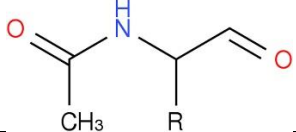 |
| Cluster 11          | Bacteriocin-Nrps | 66796       | Bacillibactin biosynthetic gene cluster (100% of genes show similarity) |  |
| Cluster 12          | Nrps             | 68420       | -                                                                       |  |
| Cluster 13          | Other            | 41400       | Bacilysin biosynthetic gene cluster (100% of genes show similarity)     | -                                                                                   |
| Cluster 14          | Lantipeptide     | 23984       | Mersacidin biosynthetic gene cluster (100% of genes show similarity)    | -                                                                                   |

Table S1. Continued.

| Strain clusters | Type            | Length (bp) | Most similar known clusters                                           | Predicted core clusters                                                              |
|-----------------|-----------------|-------------|-----------------------------------------------------------------------|--------------------------------------------------------------------------------------|
| <b>OB9</b>      |                 |             |                                                                       |                                                                                      |
| Cluster 1       | Nrps            | 59996       | -                                                                     | -                                                                                    |
| Cluster 2       | Other           | 41418       | Bacilysin biosynthetic gene cluster (100% of genes show similarity)   | -                                                                                    |
| Cluster 3       | Transatpks      | 29287       | Difficidin biosynthetic gene cluster (46% of genes show similarity)   | 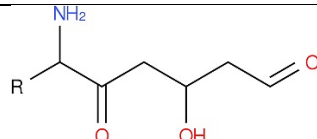  |
| Cluster 4       | Terpene         | 20740       | -                                                                     | -                                                                                    |
| Cluster 5       | Transatpks      | 85896       | Macrolactin biosynthetic gene cluster (100% of genes show similarity) |   |
| Cluster 6       | Nrps-Transatpks | 102689      | Bacillaene biosynthetic gene cluster (100% of genes show similarity)  |   |
| Cluster 7       | Nrps-Transatpks | 88306       | Fengycin biosynthetic gene cluster (86% of genes show similarity)     |  |
| Cluster 8       | Transatpks      | 46467       | Difficidin biosynthetic gene cluster (53% of genes show similarity)   | -                                                                                    |
| Cluster 9       | T3pks           | 41109       | -                                                                     | -                                                                                    |
| Cluster 10      | Terpene         | 21883       | -                                                                     | -                                                                                    |

Table S1. Continued.

| Strain clusters | Type             | Length (bp) | Most similar known clusters                                             | Predicted core clusters                                                               |
|-----------------|------------------|-------------|-------------------------------------------------------------------------|---------------------------------------------------------------------------------------|
| <b>OB9</b>      |                  |             |                                                                         |                                                                                       |
| Cluster 11      | Nrps             | 34385       | Plipastatin biosynthetic gene cluster (46% of genes show similarity)    | 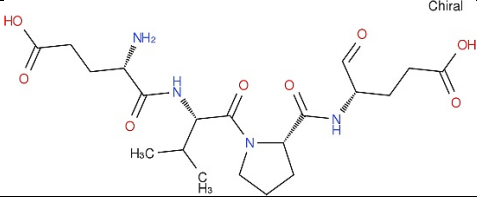   |
| Cluster 12      | Nrps             | 26341       | Surfactin biosynthetic gene cluster (47% of genes show similarity)      | -                                                                                     |
| Cluster 13      | Nrps             | 39021       | Surfactin biosynthetic gene cluster (52% of genes show similarity)      |    |
| Cluster 14      | Bacteriocin-Nrps | 51794       | Bacillibactin biosynthetic gene cluster (100% of genes show similarity) |    |
| Cluster 15      | Otherks          | 41244       | Butirosin biosynthetic gene cluster (7% of genes show similarity)       | -                                                                                     |
| Cluster 16      | Transatpks       | 24960       | Difficidin biosynthetic gene cluster (26% of genes show similarity)     |  |
| Cluster 17      | Nrps             | 14478       | Fengycin biosynthetic gene cluster (26% of genes show similarity)       |  |

Table S1. Continued.

| Strain clusters | Type            | Length (bp) | Most similar known clusters                                           | Predicted core clusters                                                               |
|-----------------|-----------------|-------------|-----------------------------------------------------------------------|---------------------------------------------------------------------------------------|
| <b>ZL918</b>    |                 |             |                                                                       |                                                                                       |
| Cluster 1       | Nrps            | 65407       | Surfactin biosynthetic gene cluster (78% of genes show similarity)    | 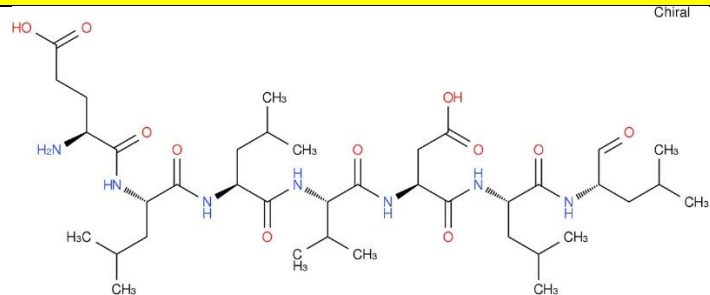   |
| Cluster 2       | Thiopeptide     | 27295       | Kijanimicin biosynthetic gene cluster (4% of genes show similarity)   | -                                                                                     |
| Cluster 3       | Otherks         | 41244       | Butirosin biosynthetic gene cluster (7% of genes show similarity)     | -                                                                                     |
| Cluster 4       | Terpene         | 20740       | -                                                                     | -                                                                                     |
| Cluster 5       | Transatpks      | 85887       | Macrolactin biosynthetic gene cluster (100% of genes show similarity) | -                                                                                     |
| Cluster 6       | Transatpks-Nrps | 102692      | Bacillaene biosynthetic gene cluster (100% of genes show similarity)  |   |
| Cluster 7       | Transatpks-Nrps | 122420      | Fengycin biosynthetic gene cluster (93% of genes show similarity)     |  |

Table S1. Continued.

| Strain clusters | Type             | Length (bp) | Most similar known clusters                                             | Predicted core clusters                                                             |
|-----------------|------------------|-------------|-------------------------------------------------------------------------|-------------------------------------------------------------------------------------|
| <b>ZL918</b>    |                  |             |                                                                         |                                                                                     |
| Cluster 8       | Terpene          | 21883       | -                                                                       | -                                                                                   |
| Cluster 9       | T3pks            | 41100       | -                                                                       | -                                                                                   |
| Cluster 10      | Transatpks       | 100450      | Difficidin biosynthetic gene cluster (100% of genes show similarity)    | 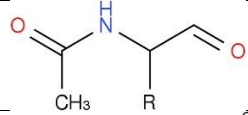 |
| Cluster 11      | Bacteriocin-Nrps | 66792       | Bacillibactin biosynthetic gene cluster (100% of genes show similarity) |  |
| Cluster 12      | Other            | 41418       | Bacilysin biosynthetic gene cluster (100% of genes show similarity)     | -                                                                                   |

Table S1. Continued.

| Strain clusters | Type             | Length (bp) | Most similar known clusters                                             | Predicted core clusters                                                               |
|-----------------|------------------|-------------|-------------------------------------------------------------------------|---------------------------------------------------------------------------------------|
| <b>YJ11-1-4</b> |                  |             |                                                                         |                                                                                       |
| Cluster 1       | Other            | 41418       | Bacilysin biosynthetic gene cluster (100% of genes show similarity)     | -                                                                                     |
| Cluster 2       | Bacteriocin-Nrps | 66789       | Bacillibactin biosynthetic gene cluster (100% of genes show similarity) | 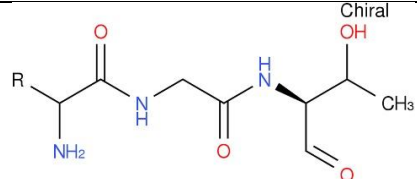   |
| Cluster 3       | Transatpks       | 100451      | Difficidin biosynthetic gene cluster (100% of genes show similarity)    |    |
| Cluster 4       | T3pks            | 41100       | -                                                                       | -                                                                                     |
| Cluster 5       | Terpene          | 21883       | -                                                                       | -                                                                                     |
| Cluster 6       | Transatpks-Nrps  | 137810      | Fengycin_biosynthetic_gene_cluster (100% of genes show similarity)      |   |
| Cluster 7       | Transatpks-Nrps  | 102670      | Bacillaene biosynthetic gene cluster (100% of genes show similarity)    |  |



Table S1. Continued.

| Strain clusters | Type             | Length (bp) | Most similar known clusters                                           | Predicted core clusters                                                                                                              |
|-----------------|------------------|-------------|-----------------------------------------------------------------------|--------------------------------------------------------------------------------------------------------------------------------------|
| <b>YJ11-1-4</b> |                  |             |                                                                       |                                                                                                                                      |
| Cluster 8       | Transatpks       | 85889       | Macrolactin biosynthetic gene cluster (100% of genes show similarity) | -                                                                                                                                    |
| Cluster 9       | Terpene          | 20740       | -                                                                     | -                                                                                                                                    |
| Cluster 10      | Otherks          | 41244       | Butirosin biosynthetic gene cluster (7% of genes show similarity)     | -                                                                                                                                    |
| Cluster 11      | Transatpks-T1pks | 106587      | Bacillaene biosynthetic gene cluster (64% of genes show similarity)   | 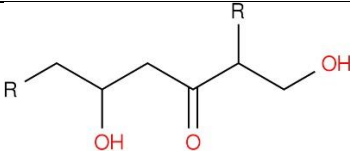 <chem>R-CH2-CH(OH)-CH2-C(=O)-CH(R)-CH2-OH</chem> |
| Cluster 12      | Nrps             | 65406       | Surfactin biosynthetic gene cluster (78% of genes show similarity)    |  <p>Chiral</p>                                    |

Table S1. Continued.

| Strain clusters | Type      | Length (bp) | Most similar known clusters                                         | Predicted core clusters |
|-----------------|-----------|-------------|---------------------------------------------------------------------|-------------------------|
| <b>V4</b>       |           |             |                                                                     |                         |
| Cluster 1       | Other     | 41418       | Bacilysin biosynthetic gene cluster (100% of genes show similarity) | -                       |
| Cluster 2       | Nrps      | 25488       | Surfactin biosynthetic gene cluster (39% of genes show similarity)  | -                       |
| Cluster 3       | Nrps      | 28039       | Surfactin biosynthetic gene cluster (47% of genes show similarity)  | <p>Chiral</p>           |
| Cluster 4       | Transatpk | 23766       | Difficidin biosynthetic gene cluster (26% of genes show similarity) |                         |
| Cluster 5       | Nrps      | 13267       | Fengycin biosynthetic gene cluster (20% of genes show similarity)   | <p>Chiral</p>           |
| Cluster 6       | Nrps      | 10261       | Fengycin biosynthetic gene cluster (20% of genes show similarity)   | <p>Chiral</p>           |

Table S1. Continued.

| Strain clusters | Type             | Length (bp) | Most similar known clusters                                             | Predicted core clusters                                                               |
|-----------------|------------------|-------------|-------------------------------------------------------------------------|---------------------------------------------------------------------------------------|
| <b>V4</b>       |                  |             |                                                                         |                                                                                       |
| Cluster 7       | Bacteriocin-Nrps | 66791       | Bacillibactin biosynthetic gene cluster (100% of genes show similarity) | 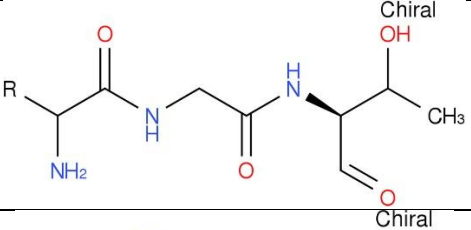   |
| Cluster 8       | Nrps             | 9654        | Surfactin biosynthetic gene cluster (8% of genes show similarity)       |    |
| Cluster 9       | Transatpks-Nrps  | 87854       | Fengycin biosynthetic gene cluster (80% of genes show similarity)       |   |
| Cluster 10      | Transatpks-Nrps  | 102674      | Bacillaene biosynthetic gene cluster (100% of genes show similarity)    |  |
| Cluster 11      | Transatpks       | 85905       | Macrolactin biosynthetic gene cluster (100% of genes show similarity)   |  |
| Cluster 12      | Transatpks       | 28966       | Difficidin biosynthetic gene cluster (46% of genes show similarity)     |  |

Table S1. Continued.

| Strain clusters | Type         | Length (bp) | Most similar known clusters                                          | Predicted core clusters |
|-----------------|--------------|-------------|----------------------------------------------------------------------|-------------------------|
| <b>V4</b>       |              |             |                                                                      |                         |
| Cluster 13      | Otherks      | 41244       | Butirosin biosynthetic gene cluster (7% of genes show similarity)    | -                       |
| Cluster 14      | Terpene      | 20740       | -                                                                    | -                       |
| Cluster 15      | Lantipeptide | 28888       | -                                                                    | -                       |
| Cluster 16      | Transatpks   | 46296       | Difficidin biosynthetic gene cluster (53% of genes show similarity)  | -                       |
| Cluster 17      | T3pks        | 41100       | -                                                                    | -                       |
| Cluster 18      | Terpene      | 21883       | -                                                                    | -                       |
| Cluster 19      | Nrps         | 21910       | Plipastatin biosynthetic gene cluster (30% of genes show similarity) | -                       |

Table S1. Continued.

| Strain clusters | Type             | Length (bp) | Most similar known clusters                                             | Predicted core clusters                                                               |
|-----------------|------------------|-------------|-------------------------------------------------------------------------|---------------------------------------------------------------------------------------|
| <b>W2</b>       |                  |             |                                                                         |                                                                                       |
| Cluster 1       | Nrps             | 26386       | -                                                                       | -                                                                                     |
| Cluster 2       | Bacteriocin-Nrps | 66179       | Bacillibactin biosynthetic gene cluster (100% of genes show similarity) | 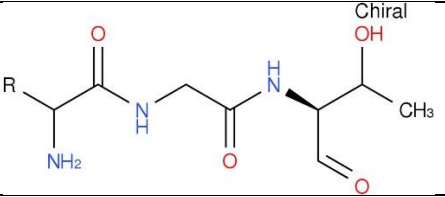   |
| Cluster 3       | Otherks          | 41244       | Butirosin biosynthetic gene cluster (7% of genes show similarity)       | -                                                                                     |
| Cluster 4       | Terpene          | 20740       | -                                                                       | -                                                                                     |
| Cluster 5       | Other            | 41418       | Bacilysin biosynthetic gene cluster (100% of genes show similarity)     | -                                                                                     |
| Cluster 6       | Nrps             | 65408       | Surfactin biosynthetic gene cluster (91% of genes show similarity)      |   |
| Cluster 7       | Transatpks       | 85899       | Macrolactin biosynthetic gene cluster (100% of genes show similarity)   |  |
| Cluster 8       | Transatpks       | 100449      | Difficidin biosynthetic gene cluster (100% of genes show similarity)    |  |
| Cluster 9       | T3pks            | 41100       | -                                                                       | -                                                                                     |
| Cluster 10      | Terpene          | 21883       | -                                                                       | -                                                                                     |

Table S1. Continued.

| Strain clusters | Type                        | Length (bp) | Most similar known clusters                                          | Predicted core clusters                                                                             |
|-----------------|-----------------------------|-------------|----------------------------------------------------------------------|-----------------------------------------------------------------------------------------------------|
| <b>W2</b>       |                             |             |                                                                      |                                                                                                     |
| Cluster 11      | Bacteriocin-Transatpks-Nrps | 150962      | Fengycin biosynthetic gene cluster (100% of genes show similarity)   | 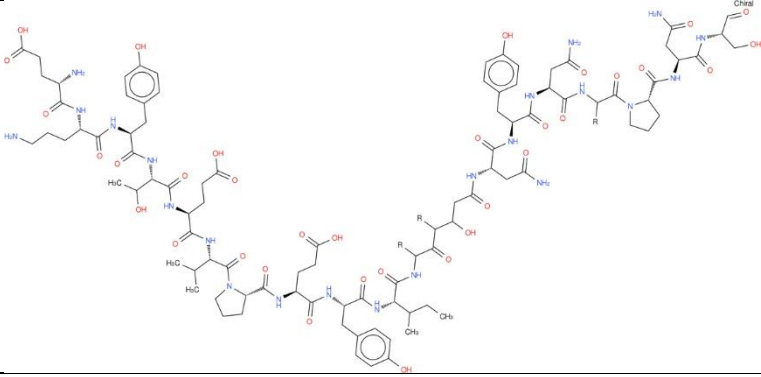                 |
| Cluster 12      | Transatpks-Nrps             | 102680      | Bacillaene biosynthetic gene cluster (100% of genes show similarity) |                  |
| Cluster 13      | Other                       | 22150       | -                                                                    | -                                                                                                   |
| Cluster 14      | Nrps                        | 8736        | -                                                                    | <p>Chiral</p>    |
| Cluster 15      | Nrps                        | 7328        | -                                                                    | <p>Chiral</p>  |
| Cluster 16      | Nrps                        | 2543        | -                                                                    | -                                                                                                   |
| Cluster 17      | Other                       | 1086        | -                                                                    | -                                                                                                   |

Table S1. Continued.

| Strain clusters | Type            | Length (bp) | Most similar known clusters                                           | Predicted core clusters                                                               |
|-----------------|-----------------|-------------|-----------------------------------------------------------------------|---------------------------------------------------------------------------------------|
| <b>UCMB5113</b> |                 |             |                                                                       |                                                                                       |
| Cluster 1       | Lantipeptide    | 22615       | Locillomycin biosynthetic gene cluster (35% of genes show similarity) | -                                                                                     |
| Cluster 2       | Nrps            | 65407       | Surfactin biosynthetic gene cluster (91% of genes show similarity)    | 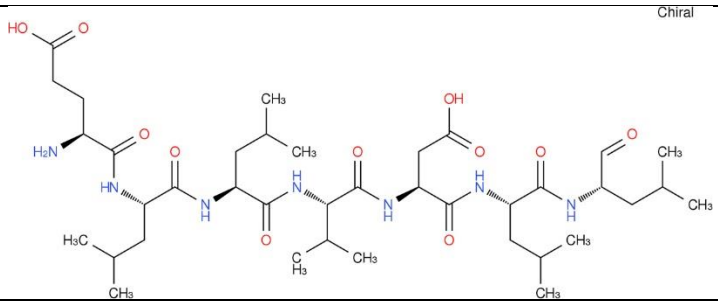   |
| Cluster 3       | Ladderane       | 41121       | -                                                                     | -                                                                                     |
| Cluster 4       | Otherks         | 41244       | Butirosin biosynthetic gene cluster (7% of genes show similarity)     | -                                                                                     |
| Cluster 5       | Terpene         | 20740       | -                                                                     | -                                                                                     |
| Cluster 6       | Transatpks      | 85899       | Macrolactin biosynthetic gene cluster (100% of genes show similarity) | -                                                                                     |
| Cluster 7       | Transatpks-Nrps | 102698      | Bacillaene biosynthetic gene cluster (100% of genes show similarity)  |   |
| Cluster 8       | Transatpks-Nrps | 137848      | Fengycin biosynthetic gene cluster (100% of genes show similarity)    |  |

Table S1. Continued.

| Strain clusters | Type             | Length (bp) | Most similar known clusters                                             | Predicted core clusters                                                                                                                     |
|-----------------|------------------|-------------|-------------------------------------------------------------------------|---------------------------------------------------------------------------------------------------------------------------------------------|
| <b>UCMB5113</b> |                  |             |                                                                         |                                                                                                                                             |
| Cluster 9       | Terpene          | 21883       | -                                                                       | -                                                                                                                                           |
| Cluster 10      | T3pks            | 41100       | -                                                                       | -                                                                                                                                           |
| Cluster 11      | Transatpks       | 100453      | Difficidin biosynthetic gene cluster (100% of genes show similarity)    | 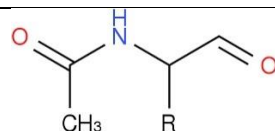 <chem>CC(=O)NC(R)C=O</chem>                             |
| Cluster 12      | Nrps             | 52066       | -                                                                       |  <chem>R[C@@H](C(=O)N[C@@H](C=O)C[C@H](O)C)C(=O)N</chem> |
| Cluster 13      | Bacteriocin-Nrps | 66793       | Bacillibactin biosynthetic gene cluster (100% of genes show similarity) |  <chem>R[C@@H](C(=O)N[C@@H](C=O)C[C@H](O)C)C(=O)N</chem> |
| Cluster 14      | Other            | 41418       | Bacilysin biosynthetic gene cluster (100% of genes show similarity)     | -                                                                                                                                           |



Table S1. Continued.

| Strain clusters | Type            | Length (bp) | Most similar known clusters                                            | Predicted core clusters                                                               |
|-----------------|-----------------|-------------|------------------------------------------------------------------------|---------------------------------------------------------------------------------------|
| <b>UCMB5033</b> |                 |             |                                                                        |                                                                                       |
| Cluster 1       | Transatpks-Nrps | 69228       | Locillomycin biosynthetic gene cluster (100% of genes show similarity) | 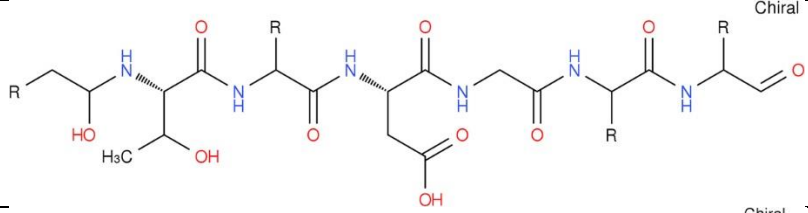   |
| Cluster 2       | Nrps            | 65407       | Surfactin biosynthetic gene cluster (91% of genes show similarity)     |    |
| Cluster 3       | Otherks         | 41244       | Butirosin biosynthetic gene cluster (7% of genes show similarity)      | -                                                                                     |
| Cluster 4       | Terpene         | 20740       | -                                                                      | -                                                                                     |
| Cluster 5       | Transatpks      | 85896       | Macrolactin biosynthetic gene cluster (100% of genes show similarity)  | -                                                                                     |
| Cluster 6       | Transatpks-Nrps | 102695      | Bacillaene biosynthetic gene cluster (100% of genes show similarity)   |  |

Table S1. Continued.

| Strain clusters | Type             | Length (bp) | Most similar known clusters                                             | Predicted core clusters                                                              |
|-----------------|------------------|-------------|-------------------------------------------------------------------------|--------------------------------------------------------------------------------------|
| <b>UCMB5033</b> |                  |             |                                                                         |                                                                                      |
| Cluster 7       | Transatpks-Nrps  | 122436      | Fengycin biosynthetic gene cluster (93% of genes show similarity)       | 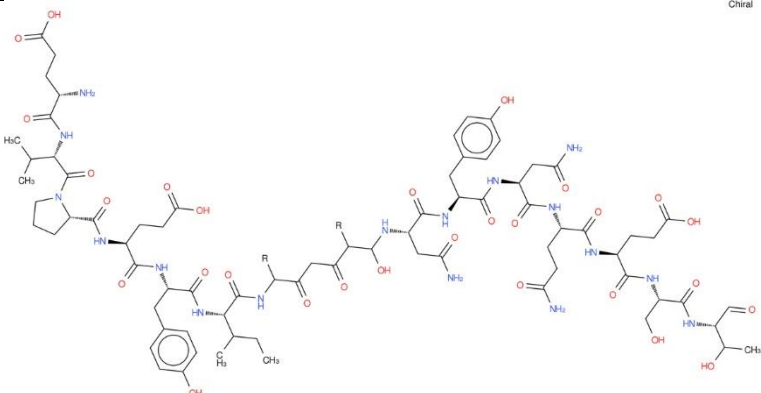  |
| Cluster 8       | Terpene          | 21883       | -                                                                       | -                                                                                    |
| Cluster 9       | T3pks            | 41100       | -                                                                       | -                                                                                    |
| Cluster 10      | Transatpks       | 100450      | Difficidin biosynthetic gene cluster (100% of genes show similarity)    |   |
| Cluster 11      | Bacteriocin-Nrps | 66792       | Bacillibactin biosynthetic gene cluster (100% of genes show similarity) |  |
| Cluster 12      | Other            | 41418       | Bacilysin biosynthetic gene cluster (100% of genes show similarity)     | -                                                                                    |

Table S1. Continued.

| Strain clusters | Type            | Length (bp) | Most similar known clusters                                          | Predicted core clusters                                                                            |
|-----------------|-----------------|-------------|----------------------------------------------------------------------|----------------------------------------------------------------------------------------------------|
| <b>SYBC H47</b> |                 |             |                                                                      |                                                                                                    |
| Cluster 1       | Transatpks      | 75781       | Difficidin biosynthetic gene cluster (86% of genes show similarity)  | 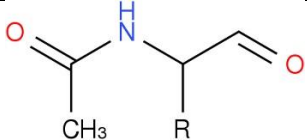 <p>Chiral</p>  |
| Cluster 2       | T3pks-Nrps      | 87478       | Plipastatin biosynthetic gene cluster (23% of genes show similarity) |  <p>Chiral</p>  |
| Cluster 3       | Terpene         | 21883       | -                                                                    | -                                                                                                  |
| Cluster 4       | Transatpks-Nrps | 111281      | Fengycin biosynthetic gene cluster (93% of genes show similarity)    |  <p>Chiral</p> |

Table S1. Continued.

| Strain clusters | Type             | Length (bp) | Most similar known clusters                                             | Predicted core clusters                                                               |
|-----------------|------------------|-------------|-------------------------------------------------------------------------|---------------------------------------------------------------------------------------|
| <b>SYBC H47</b> |                  |             |                                                                         |                                                                                       |
| Cluster 5       | Transatpks-Nrps  | 102701      | Bacillaene biosynthetic gene cluster (100% of genes show similarity)    | 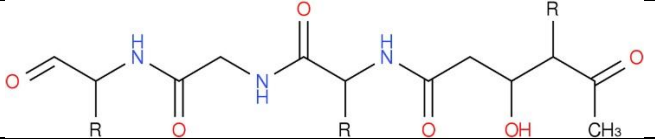   |
| Cluster 6       | Transatpks       | 85877       | Macrolactin biosynthetic gene cluster (100% of genes show similarity)   | -                                                                                     |
| Cluster 7       | Terpene          | 20740       | -                                                                       | -                                                                                     |
| Cluster 8       | Otherks          | 41244       | Butirosin biosynthetic gene cluster (7% of genes show similarity)       | -                                                                                     |
| Cluster 9       | Nrps             | 65407       | Surfactin biosynthetic gene cluster (91% of genes show similarity)      |    |
| Cluster 10      | Transatpks-Nrps  | 77730       | Rhizocticin biosynthetic gene cluster (22% of genes show similarity)    |   |
| Cluster 11      | Bacteriocin-Nrps | 66794       | Bacillibactin biosynthetic gene cluster (100% of genes show similarity) |  |

Table S1. Continued.

| Strain clusters | Type  | Length (bp) | Most similar known clusters                                         | Predicted core clusters                                                             |
|-----------------|-------|-------------|---------------------------------------------------------------------|-------------------------------------------------------------------------------------|
| <b>SYBC H47</b> |       |             |                                                                     |                                                                                     |
| Cluster 12      | Nrps  | 68423       | -                                                                   |  |
| Cluster 13      | Other | 41418       | Bacilysin biosynthetic gene cluster (100% of genes show similarity) | -                                                                                   |

Table S1. Continued.

| Strain clusters     | Type            | Length (bp) | Most similar known clusters                                           | Predicted core clusters                                                               |
|---------------------|-----------------|-------------|-----------------------------------------------------------------------|---------------------------------------------------------------------------------------|
| <b>TrigoCor1448</b> |                 |             |                                                                       |                                                                                       |
| Cluster 1           | Nrps            | 65407       | Surfactin biosynthetic gene cluster (91% of genes show similarity)    | 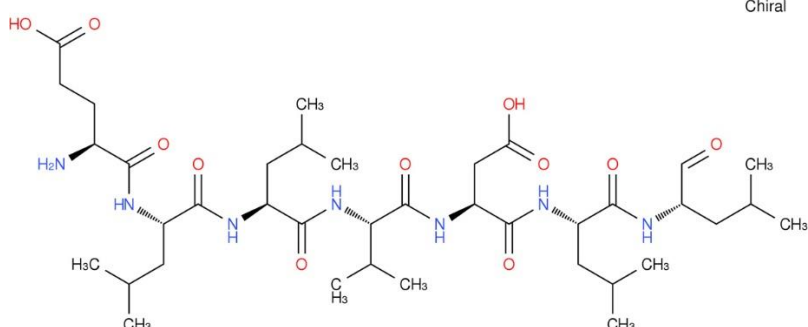   |
| Cluster 2           | Otherks         | 41244       | Butirosin biosynthetic gene cluster (7% of genes show similarity)     | -                                                                                     |
| Cluster 3           | Terpene         | 20740       | -                                                                     | -                                                                                     |
| Cluster 4           | Transatpks      | 85905       | Macrolactin biosynthetic gene cluster (100% of genes show similarity) | -                                                                                     |
| Cluster 5           | Transatpks-Nrps | 102692      | Bacillaene biosynthetic gene cluster (100% of genes show similarity)  |   |
| Cluster 6           | Transatpks-Nrps | 137813      | Fengycin biosynthetic gene cluster (100% of genes show similarity)    |  |

Table S1. Continued.

| Strain clusters     | Type             | Length (bp) | Most similar known clusters                                             | Predicted core clusters                                                             |
|---------------------|------------------|-------------|-------------------------------------------------------------------------|-------------------------------------------------------------------------------------|
| <b>TrigoCor1448</b> |                  |             |                                                                         |                                                                                     |
| Cluster 7           | Terpene          | 21883       | -                                                                       | -                                                                                   |
| Cluster 8           | T3pks            | 41100       | -                                                                       | -                                                                                   |
| Cluster 9           | Transatpks       | 100455      | Difficidin biosynthetic gene cluster (100% of genes show similarity)    | 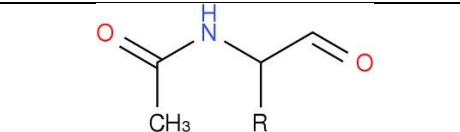 |
| Cluster 10          | Nrps             | 52666       | Micrococcin P1 biosynthetic gene cluster (8% of genes show similarity)  |  |
| Cluster 11          | Bacteriocin-Nrps | 66791       | Bacillibactin biosynthetic gene cluster (100% of genes show similarity) |  |
| Cluster 12          | Other            | 41418       | Bacilysin biosynthetic gene cluster (100% of genes show similarity)     | -                                                                                   |

Table S1. Continued.

| Strain clusters | Type             | Length (bp) | Most similar known clusters                                             | Predicted core clusters                                                              |
|-----------------|------------------|-------------|-------------------------------------------------------------------------|--------------------------------------------------------------------------------------|
| <b>SSBW-19</b>  |                  |             |                                                                         |                                                                                      |
| Cluster 1       | Other            | 41418       | Bacilysin biosynthetic gene cluster (100% of genes show similarity)     | -                                                                                    |
| Cluster 2       | Bacteriocin-Nrps | 66794       | Bacillibactin biosynthetic gene cluster (100% of genes show similarity) | 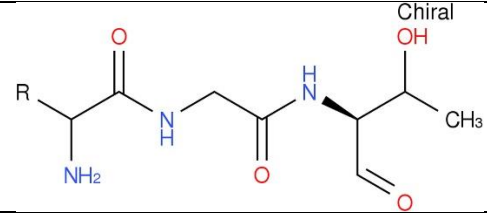  |
| Cluster 3       | Otherks          | 41244       | Butirosin biosynthetic gene cluster (7% of genes show similarity)       | -                                                                                    |
| Cluster 4       | Terpene          | 20740       | -                                                                       | -                                                                                    |
| Cluster 5       | Transatpks       | 85885       | Macrolactin biosynthetic gene cluster (100% of genes show similarity)   |   |
| Cluster 6       | Transatpks-Nrps  | 102677      | Bacillaene biosynthetic gene cluster (100% of genes show similarity)    |   |
| Cluster 7       | Transatpks-Nrps  | 87842       | Fengycin biosynthetic gene cluster (80% of genes show similarity)       |  |



Table S1. Continued.

| Strain clusters | Type         | Length (bp) | Most similar known clusters                                          | Predicted core clusters                                                               |
|-----------------|--------------|-------------|----------------------------------------------------------------------|---------------------------------------------------------------------------------------|
| <b>SSBW-19</b>  |              |             |                                                                      |                                                                                       |
| Cluster 8       | Nrps         | 37950       | Plipastatin biosynthetic gene cluster (46% of genes show similarity) | 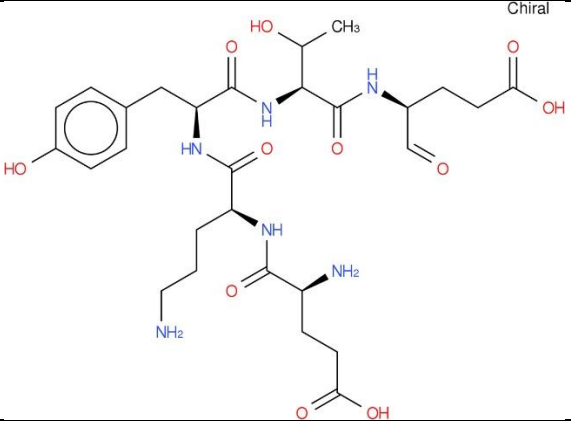   |
| Cluster 9       | Terpene      | 21883       | -                                                                    | -                                                                                     |
| Cluster 10      | T3pks        | 41100       | -                                                                    | -                                                                                     |
| Cluster 11      | Transatpks   | 100459      | Difficidin biosynthetic gene cluster (100% of genes show similarity) |    |
| Cluster 12      | Nrps         | 65407       | Surfactin biosynthetic gene cluster (78% of genes show similarity)   |   |
| Cluster 13      | Lantipeptide | 18500       | -                                                                    | -                                                                                     |
| Cluster 14      | Nrps         | 9486        | Fengycin biosynthetic gene cluster (20% of genes show similarity)    |  |

Table S1. Continued.

| Strain clusters | Type | Length (bp) | Most similar known clusters | Predicted core clusters |
|-----------------|------|-------------|-----------------------------|-------------------------|
| <b>SSBW-19</b>  |      |             |                             |                         |
| Cluster 15      | Nrps | 1525        | -                           | -                       |

Table S1. Continued.

| Strain clusters | Type             | Length (bp) | Most similar known clusters                                             | Predicted core clusters                                                               |
|-----------------|------------------|-------------|-------------------------------------------------------------------------|---------------------------------------------------------------------------------------|
| <b>sx01604</b>  |                  |             |                                                                         |                                                                                       |
| Cluster 1       | Other            | 41418       | Bacilysin biosynthetic gene cluster (100% of genes show similarity)     | -                                                                                     |
| Cluster 2       | Bacteriocin-Nrps | 66791       | Bacillibactin biosynthetic gene cluster (100% of genes show similarity) | 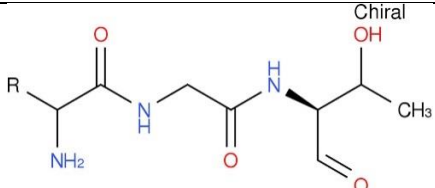   |
| Cluster 3       | Transatpkps      | 96784       | Difficidin biosynthetic gene cluster (66% of genes show similarity)     | -                                                                                     |
| Cluster 4       | T3pkps           | 41100       | -                                                                       | -                                                                                     |
| Cluster 5       | Terpene          | 21883       | -                                                                       | -                                                                                     |
| Cluster 6       | Transatpkps-Nrps | 137801      | Fengycin biosynthetic gene cluster (100% of genes show similarity)      |   |
| Cluster 7       | Transatpkps-Nrps | 102674      | Bacillaene biosynthetic gene cluster (100% of genes show similarity)    |  |
| Cluster 8       | Transatpkps      | 85905       | Macrolactin biosynthetic gene cluster (100% of genes show similarity)   | -                                                                                     |
| Cluster 9       | Lantipeptide     | 28888       | -                                                                       | -                                                                                     |

Table S1. Continued.

| Strain clusters | Type    | Length (bp) | Most similar known clusters                                        | Predicted core clusters                                                             |
|-----------------|---------|-------------|--------------------------------------------------------------------|-------------------------------------------------------------------------------------|
| <b>sx01604</b>  |         |             |                                                                    |                                                                                     |
| Cluster 10      | Terpene | 20740       | -                                                                  | -                                                                                   |
| Cluster 11      | Otherks | 41244       | Butirosin biosynthetic gene cluster (7% of genes show similarity)  | -                                                                                   |
| Cluster 12      | Nrps    | 65407       | Surfactin biosynthetic gene cluster (82% of genes show similarity) | 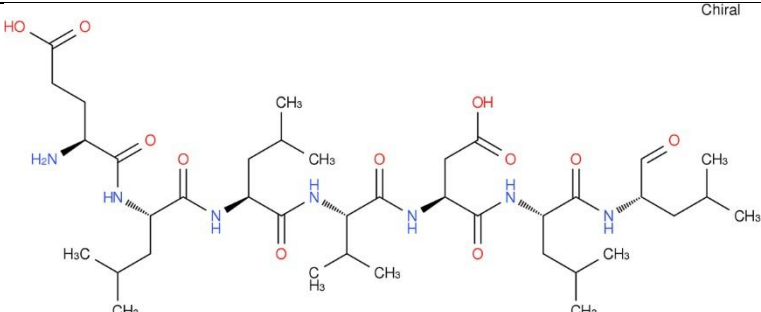 |

Table S1. Continued.

| Strain clusters | Type             | Length (bp) | Most similar known clusters                                             | Predicted core clusters                                                              |
|-----------------|------------------|-------------|-------------------------------------------------------------------------|--------------------------------------------------------------------------------------|
| <b>SSBW-18</b>  |                  |             |                                                                         |                                                                                      |
| Cluster 1       | Otherks          | 41244       | Butirosin biosynthetic gene cluster (7% of genes show similarity)       | -                                                                                    |
| Cluster 2       | Terpene          | 20740       | -                                                                       | -                                                                                    |
| Cluster 3       | Transatpks       | 85887       | Macrolactin biosynthetic gene cluster (100% of genes show similarity)   | 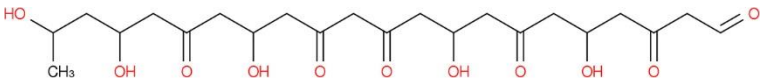  |
| Cluster 4       | Transatpks-Nrps  | 102692      | Bacillaene biosynthetic gene cluster (100% of genes show similarity)    |   |
| Cluster 5       | Transatpks-Nrps  | 115398      | Fengycin biosynthetic gene cluster (93% of genes show similarity)       |   |
| Cluster 6       | Bacteriocin-Nrps | 66793       | Bacillibactin biosynthetic gene cluster (100% of genes show similarity) |  |
| Cluster 7       | Other            | 41418       | Bacilysin biosynthetic gene cluster (100% of genes show similarity)     | -                                                                                    |
| Cluster 8       | Nrps             | 21974       | Plipastatin biosynthetic gene cluster (30% of genes show similarity)    | -                                                                                    |
| Cluster 9       | Terpene          | 21883       | -                                                                       | -                                                                                    |
| Cluster 10      | T3pks            | 41100       | -                                                                       | -                                                                                    |

Table S1. Continued.

| Strain clusters | Type         | Length (bp) | Most similar known clusters                                           | Predicted core clusters                                                                           |
|-----------------|--------------|-------------|-----------------------------------------------------------------------|---------------------------------------------------------------------------------------------------|
| <b>SSBW-18</b>  |              |             |                                                                       |                                                                                                   |
| Cluster 11      | Transatpks   | 100453      | Difficidin biosynthetic gene cluster (100% of genes show similarity)  | 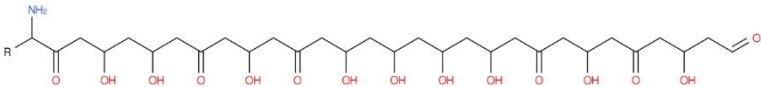               |
| Cluster 12      | Nrps         | 25942       | Surfactin biosynthetic gene cluster (39% of genes show similarity)    | -                                                                                                 |
| Cluster 13      | Nrps         | 27929       | Surfactin biosynthetic gene cluster (47% of genes show similarity)    | <p>Chiral</p>  |
| Cluster 14      | Lantipeptide | 22609       | Locillomycin biosynthetic gene cluster (35% of genes show similarity) | -                                                                                                 |
| Cluster 15      | Nrps         | 9998        | Surfactin biosynthetic gene cluster (8% of genes show similarity)     | <p>Chiral</p>  |

Table S1. Continued.

| Strain clusters | Type             | Length (bp) | Most similar known clusters                                             | Predicted core clusters                                                               |
|-----------------|------------------|-------------|-------------------------------------------------------------------------|---------------------------------------------------------------------------------------|
| <b>SSBW-8</b>   |                  |             |                                                                         |                                                                                       |
| Cluster 1       | Otherks          | 41244       | Butirosin biosynthetic gene cluster (7% of genes show similarity)       | -                                                                                     |
| Cluster 2       | Terpene          | 20740       | -                                                                       | -                                                                                     |
| Cluster 3       | Transatpks       | 85885       | Macrolactin biosynthetic gene cluster (100% of genes show similarity)   | 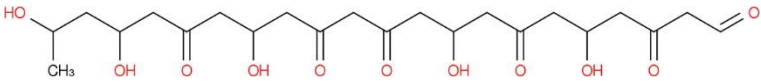   |
| Cluster 4       | Transatpks-Nrps  | 102677      | Bacillaene biosynthetic gene cluster (100% of genes show similarity)    |    |
| Cluster 5       | Transatpks-Nrps  | 88472       | Fengycin biosynthetic gene cluster (86% of genes show similarity)       |   |
| Cluster 6       | Other            | 41418       | Bacilysin biosynthetic gene cluster (100% of genes show similarity)     | -                                                                                     |
| Cluster 7       | Bacteriocin-Nrps | 66794       | Bacillibactin biosynthetic gene cluster (100% of genes show similarity) |  |

Table S1. Continued.

| Strain clusters | Type         | Length (bp) | Most similar known clusters                                          | Predicted core clusters                                                               |
|-----------------|--------------|-------------|----------------------------------------------------------------------|---------------------------------------------------------------------------------------|
| <b>SSBW-8</b>   |              |             |                                                                      |                                                                                       |
| Cluster 8       | T3pks        | 41100       | -                                                                    | -                                                                                     |
| Cluster 9       | Transatpks   | 100459      | Difficidin biosynthetic gene cluster (100% of genes show similarity) | 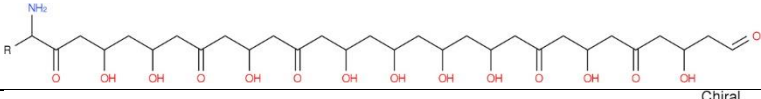   |
| Cluster 10      | Nrps         | 65407       | Surfactin biosynthetic gene cluster (78% of genes show similarity)   |    |
| Cluster 11      | Terpene      | 21883       | -                                                                    | -                                                                                     |
| Cluster 12      | Nrps         | 38094       | Plipastatin biosynthetic gene cluster (46% of genes show similarity) |   |
| Cluster 13      | Lantipeptide | 18500       | -                                                                    | -                                                                                     |
| Cluster 14      | Nrps         | 10260       | Fengycin biosynthetic gene cluster (20% of genes show similarity)    |  |



Table S1. Continued.

| Strain clusters | Type             | Length (bp) | Most similar known clusters                                             | Predicted core clusters                                                               |
|-----------------|------------------|-------------|-------------------------------------------------------------------------|---------------------------------------------------------------------------------------|
| <b>SSBW-10</b>  |                  |             |                                                                         |                                                                                       |
| Cluster 1       | Otherks          | 41244       | Butirosin biosynthetic gene cluster (7% of genes show similarity)       | -                                                                                     |
| Cluster 2       | Terpene          | 20740       | -                                                                       | -                                                                                     |
| Cluster 3       | Transatpks       | 85885       | Macrolactin biosynthetic gene cluster (100% of genes show similarity)   | 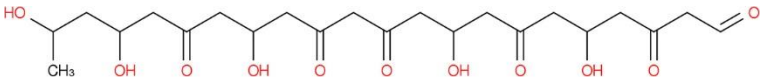   |
| Cluster 4       | Transatpks-Nrps  | 102677      | Bacillaene biosynthetic gene cluster (100% of genes show similarity)    |    |
| Cluster 5       | Transatpks-Nrps  | 88472       | Fengycin biosynthetic gene cluster (86% of genes show similarity)       |   |
| Cluster 6       | Other            | 41418       | Bacilysin biosynthetic gene cluster (100% of genes show similarity)     | -                                                                                     |
| Cluster 7       | Bacteriocin-Nrps | 66794       | Bacillibactin biosynthetic gene cluster (100% of genes show similarity) |  |

Table S1. Continued.

| Strain clusters | Type         | Length (bp) | Most similar known clusters                                          | Predicted core clusters                                                               |
|-----------------|--------------|-------------|----------------------------------------------------------------------|---------------------------------------------------------------------------------------|
| <b>SSBW-10</b>  |              |             |                                                                      |                                                                                       |
| Cluster 8       | Nrps         | 38094       | Plipastatin biosynthetic gene cluster (46% of genes show similarity) | 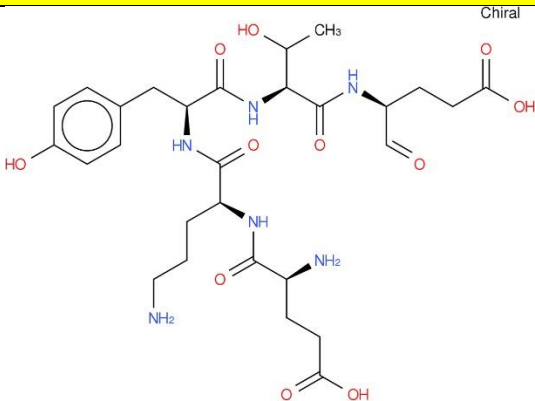   |
| Cluster 9       | Terpene      | 21883       | -                                                                    | -                                                                                     |
| Cluster 10      | T3pks        | 41100       | -                                                                    | -                                                                                     |
| Cluster 11      | Transatpks   | 100459      | Difficidin biosynthetic gene cluster (100% of genes show similarity) |    |
| Cluster 12      | Nrps         | 65407       | Surfactin biosynthetic gene cluster (78% of genes show similarity)   |   |
| Cluster 13      | Lantipeptide | 18500       | -                                                                    | -                                                                                     |
| Cluster 14      | Nrps         | 10260       | Fengycin biosynthetic gene cluster (20% of genes show similarity)    |  |

Table S1. Continued.

| Strain clusters | Type             | Length (bp) | Most similar known clusters                                             | Predicted core clusters                                                               |
|-----------------|------------------|-------------|-------------------------------------------------------------------------|---------------------------------------------------------------------------------------|
| <b>SSBW-2</b>   |                  |             |                                                                         |                                                                                       |
| Cluster 1       | Otherks          | 41244       | Butirosin biosynthetic gene cluster (7% of genes show similarity)       | -                                                                                     |
| Cluster 2       | Terpene          | 20740       | -                                                                       | -                                                                                     |
| Cluster 3       | Transatpks       | 85885       | Macrolactin biosynthetic gene cluster (100% of genes show similarity)   | 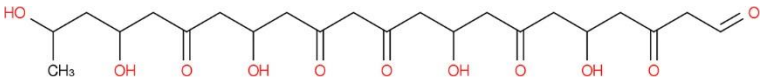   |
| Cluster 4       | Transatpks-Nrps  | 102677      | Bacillaene biosynthetic gene cluster (100% of genes show similarity)    |    |
| Cluster 5       | Transatpks-Nrps  | 88472       | Fengycin biosynthetic gene cluster (86% of genes show similarity)       |   |
| Cluster 6       | Other            | 41418       | Bacilysin biosynthetic gene cluster (100% of genes show similarity)     | -                                                                                     |
| Cluster 7       | Bacteriocin-Nrps | 66794       | Bacillibactin biosynthetic gene cluster (100% of genes show similarity) |  |

Table S1. Continued.

| Strain clusters | Type         | Length (bp) | Most similar known clusters                                          | Predicted core clusters                                                               |
|-----------------|--------------|-------------|----------------------------------------------------------------------|---------------------------------------------------------------------------------------|
| <b>SSBW-2</b>   |              |             |                                                                      |                                                                                       |
| Cluster 8       | Nrps         | 38094       | Plipastatin biosynthetic gene cluster (46% of genes show similarity) | 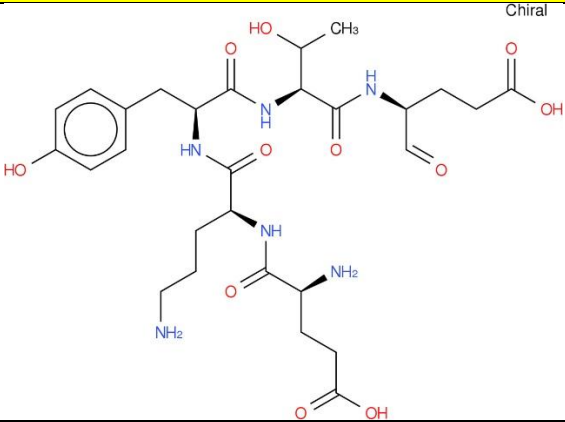   |
| Cluster 9       | Terpene      | 21883       | -                                                                    | -                                                                                     |
| Cluster 10      | T3pks        | 41100       | -                                                                    | -                                                                                     |
| Cluster 11      | Transatpks   | 100459      | Difficidin biosynthetic gene cluster (100% of genes show similarity) |    |
| Cluster 12      | Nrps         | 65407       | Surfactin biosynthetic gene cluster (78% of genes show similarity)   |   |
| Cluster 13      | Lantipeptide | 18500       | -                                                                    | -                                                                                     |
| Cluster 14      | Nrps         | 10260       | Fengycin biosynthetic gene cluster (20% of genes show similarity)    |  |

Table S1. Continued.

| Strain clusters | Type            | Length (bp) | Most similar known clusters                                            | Predicted core clusters        |
|-----------------|-----------------|-------------|------------------------------------------------------------------------|--------------------------------|
| <b>OEE-1</b>    |                 |             |                                                                        |                                |
| Cluster 1       | Nrps            | 7846        | -                                                                      | -                              |
| Cluster 2       | Nrps            | 10988       | Surfactin biosynthetic gene cluster (8% of genes show similarity)      | <div> <div>Chiral</div> </div> |
| Cluster 3       | Nrps            | 9364        | -                                                                      | -                              |
| Cluster 4       | Transatpks-Nrps | 23017       | -                                                                      | -                              |
| Cluster 5       | Nrps            | 4955        | -                                                                      | -                              |
| Cluster 6       | Terpene         | 20740       | -                                                                      | -                              |
| Cluster 7       | Nrps            | 23700       | Locillomycin biosynthetic gene cluster (35% of genes show similarity)  | -                              |
| Cluster 8       | Other           | 41418       | Bacilysin biosynthetic gene cluster (100% of genes show similarity)    | -                              |
| Cluster 9       | Nrps            | 26782       | Bacillibactin biosynthetic gene cluster (30% of genes show similarity) | <div> <div>Chiral</div> </div> |
| Cluster 10      | Nrps            | 25628       | Surfactin biosynthetic gene cluster (39% of genes show similarity)     | -                              |
| Cluster 11      | Nrps            | 27856       | Surfactin biosynthetic gene cluster (43% of genes show similarity)     | <div> <div>Chiral</div> </div> |

Table S1. Continued.

| Strain clusters | Type             | Length (bp) | Most similar known clusters                                            | Predicted core clusters                                                               |
|-----------------|------------------|-------------|------------------------------------------------------------------------|---------------------------------------------------------------------------------------|
| <b>OEE-1</b>    |                  |             |                                                                        |                                                                                       |
| Cluster 12      | Nrps             | 23107       | Plipastatin biosynthetic gene cluster (38% of genes show similarity)   | -                                                                                     |
| Cluster 13      | Terpene          | 21883       | -                                                                      | -                                                                                     |
| Cluster 14      | Transatpks-Nrps  | 82873       | Fengycin biosynthetic gene cluster (66% of genes show similarity)      | 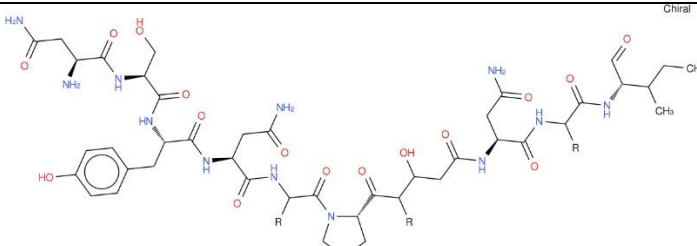   |
| Cluster 15      | Otherks          | 24921       | Butirosin biosynthetic gene cluster (7% of genes show similarity)      | -                                                                                     |
| Cluster 16      | Bacteriocin-Nrps | 40625       | Bacillibactin biosynthetic gene cluster (76% of genes show similarity) | -                                                                                     |
| Cluster 17      | Transatpks       | 15750       | Difficidin biosynthetic gene cluster (33% of genes show similarity)    |    |
| Cluster 18      | Nrps             | 2469        | -                                                                      | -                                                                                     |
| Cluster 19      | Lantipeptide     | 28889       | -                                                                      | -                                                                                     |
| Cluster 20      | Transatpks-Nrps  | 35059       | Bacillaene biosynthetic gene cluster (28% of genes show similarity)    |  |
| Cluster 21      | Nrps             | 6118        | Fengycin biosynthetic gene cluster (26% of genes show similarity)      | -                                                                                     |
| Cluster 22      | Nrps             | 14974       | Plipastatin biosynthetic gene cluster (23% of genes show similarity)   |  |

Table S1. Continued.

| Strain clusters | Type            | Length (bp) | Most similar known clusters                                           | Predicted core clusters                                                             |
|-----------------|-----------------|-------------|-----------------------------------------------------------------------|-------------------------------------------------------------------------------------|
| <b>OEE-1</b>    |                 |             |                                                                       |                                                                                     |
| Cluster 23      | Transatpks-Nrps | 13475       | Bacillaene biosynthetic gene cluster (21% of genes show similarity)   | 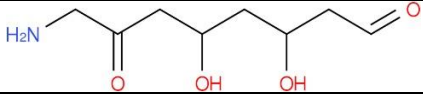 |
| Cluster 24      | Nrps            | 2552        | -                                                                     | -                                                                                   |
| Cluster 25      | Transatpks      | 75766       | Difficidin biosynthetic gene cluster (86% of genes show similarity)   |  |
| Cluster 26      | Transatpks      | 7967        | -                                                                     | -                                                                                   |
| Cluster 27      | Transatpks      | 32457       | Bacillaene biosynthetic gene cluster (28% of genes show similarity)   |  |
| Cluster 28      | T3pks           | 41100       | -                                                                     | -                                                                                   |
| Cluster 29      | Transatpks      | 85887       | Macrolactin biosynthetic gene cluster (100% of genes show similarity) |  |

Table S1. Continued.

| Strain clusters     | Type             | Length (bp) | Most similar known clusters                                             | Predicted core clusters |
|---------------------|------------------|-------------|-------------------------------------------------------------------------|-------------------------|
| <b>NRRL B-41580</b> |                  |             |                                                                         |                         |
| Cluster 1           | Nrps             | 27617       | Surfactin biosynthetic gene cluster (47% of genes show similarity)      |                         |
| Cluster 2           | Nrps             | 25178       | Surfactin biosynthetic gene cluster (39% of genes show similarity)      | -                       |
| Cluster 3           | Nrps             | 14787       | Fengycin biosynthetic gene cluster (26% of genes show similarity)       |                         |
| Cluster 4           | Transatpks       | 42887       | Bacillaene biosynthetic gene cluster (28% of genes show similarity)     |                         |
| Cluster 5           | Transatpks       | 100453      | Difficidin biosynthetic gene cluster (100% of genes show similarity)    |                         |
| Cluster 6           | T3pks            | 41100       | -                                                                       | -                       |
| Cluster 7           | Terpene          | 21883       | -                                                                       | -                       |
| Cluster 8           | Nrps             | 2334        | -                                                                       | -                       |
| Cluster 9           | Nrps             | 1883        | -                                                                       | -                       |
| Cluster 10          | Bacteriocin-Nrps | 66793       | Bacillibactin biosynthetic gene cluster (100% of genes show similarity) |                         |



Table S1. Continued.

| Strain clusters     | Type            | Length (bp) | Most similar known clusters                                           | Predicted core clusters                                                               |
|---------------------|-----------------|-------------|-----------------------------------------------------------------------|---------------------------------------------------------------------------------------|
| <b>NRRL_B-41580</b> |                 |             |                                                                       |                                                                                       |
| Cluster 11          | Transatpks-Nrps | 59808       | Bacillaene biosynthetic gene cluster (85% of genes show similarity)   | 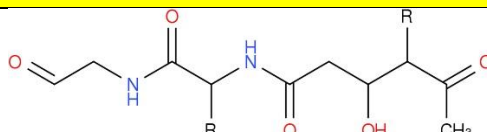   |
| Cluster 12          | Transatpks      | 85902       | Macrolactin biosynthetic gene cluster (100% of genes show similarity) | -                                                                                     |
| Cluster 13          | Terpene         | 20740       | -                                                                     | -                                                                                     |
| Cluster 14          | Otherks         | 41244       | Butirosin biosynthetic gene cluster (7% of genes show similarity)     | -                                                                                     |
| Cluster 15          | Nrps            | 40295       | -                                                                     | -                                                                                     |
| Cluster 16          | Other           | 41418       | Bacilysin biosynthetic gene cluster (100% of genes show similarity)   | -                                                                                     |
| Cluster 17          | Lantipeptide    | 23984       | Mersacidin biosynthetic gene cluster (100% of genes show similarity)  | -                                                                                     |
| Cluster 18          | Transatpks-Nrps | 100306      | Fengycin biosynthetic gene cluster (86% of genes show similarity)     |   |
| Cluster 19          | Phosphonate     | 40884       | -                                                                     | -                                                                                     |
| Cluster 20          | Nrps            | 8922        | Surfactin biosynthetic gene cluster (8% of genes show similarity)     |  |

Table S1. Continued.

| Strain clusters   | Type             | Length (bp) | Most similar known clusters                                             | Predicted core clusters                                                               |
|-------------------|------------------|-------------|-------------------------------------------------------------------------|---------------------------------------------------------------------------------------|
| <b>SRCM100731</b> |                  |             |                                                                         |                                                                                       |
| Cluster 1         | Transatpks       | 85902       | Macrolactin biosynthetic gene cluster (100% of genes show similarity)   | 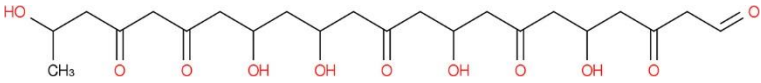   |
| Cluster 2         | Transatpks       | 22266       | Bacillaene biosynthetic gene cluster (78% of genes show similarity)     | -                                                                                     |
| Cluster 3         | Other            | 41418       | Bacilysin biosynthetic gene cluster (100% of genes show similarity)     | -                                                                                     |
| Cluster 4         | Bacteriocin      | 13078       | -                                                                       | -                                                                                     |
| Cluster 5         | Lantipeptide     | 28889       | -                                                                       | -                                                                                     |
| Cluster 6         | Bacteriocin-Nrps | 66791       | Bacillibactin biosynthetic gene cluster (100% of genes show similarity) |    |
| Cluster 7         | Transatpks       | 75781       | Difficidin biosynthetic gene cluster (86% of genes show similarity)     |    |
| Cluster 8         | Terpene          | 21883       | -                                                                       | -                                                                                     |
| Cluster 9         | Terpene          | 20740       | -                                                                       | -                                                                                     |
| Cluster 10        | Otherks          | 41244       | Butirosin biosynthetic gene cluster (7% of genes show similarity)       | -                                                                                     |
| Cluster 11        | Lasso peptide    | 22221       | -                                                                       | -                                                                                     |
| Cluster 12        | Transatpks-Nrps  | 60356       | Bacillaene biosynthetic gene cluster (42% of genes show similarity)     |  |
| Cluster 13        | Transatpks-Nrps  | 134616      | Fengycin biosynthetic gene cluster (93% of genes show similarity)       |  |

Table S1. Continued.

| Strain clusters   | Type        | Length (bp) | Most similar known clusters                                        | Predicted core clusters                                                                                        |
|-------------------|-------------|-------------|--------------------------------------------------------------------|----------------------------------------------------------------------------------------------------------------|
| <b>SRCM100731</b> |             |             |                                                                    |                                                                                                                |
| Cluster 14        | Thiopeptide | 22491       | -                                                                  | -                                                                                                              |
| Cluster 15        | Nrps        | 65407       | Surfactin biosynthetic gene cluster (82% of genes show similarity) | <div> 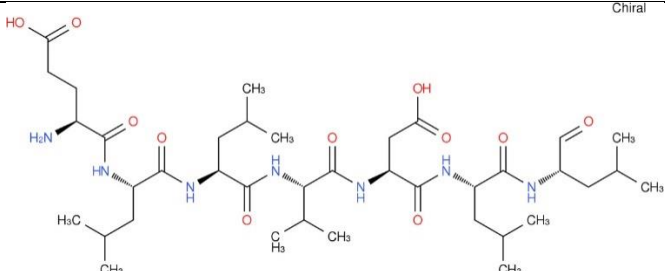 <p>Chiral</p> </div> |

Table S1. Continued.

| Strain clusters   | Type            | Length (bp) | Most similar known clusters                                           | Predicted core clusters                                                               |
|-------------------|-----------------|-------------|-----------------------------------------------------------------------|---------------------------------------------------------------------------------------|
| <b>SRCM100730</b> |                 |             |                                                                       |                                                                                       |
| Cluster 1         | Bacteriocin     | 13078       | -                                                                     | -                                                                                     |
| Cluster 2         | Other           | 41418       | Bacilysin biosynthetic gene cluster (100% of genes show similarity)   | -                                                                                     |
| Cluster 3         | Transatpks      | 75781       | Difficidin biosynthetic gene cluster (86% of genes show similarity)   | 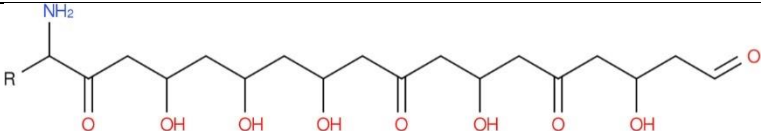   |
| Cluster 4         | Terpene         | 20740       | -                                                                     | -                                                                                     |
| Cluster 5         | Lantipeptide    | 28889       | -                                                                     | -                                                                                     |
| Cluster 6         | Thiopeptide     | 22368       | -                                                                     | -                                                                                     |
| Cluster 7         | Terpene         | 21883       | -                                                                     | -                                                                                     |
| Cluster 8         | Otherks         | 41244       | Butirosin biosynthetic gene cluster (7% of genes show similarity)     |                                                                                       |
| Cluster 9         | Lasso peptide   | 22221       | -                                                                     | -                                                                                     |
| Cluster 10        | Transatpks      | 22266       | Bacillaene biosynthetic gene cluster (78% of genes show similarity)   | -                                                                                     |
| Cluster 11        | Transatpks      | 85902       | Macrolactin biosynthetic gene cluster (100% of genes show similarity) |   |
| Cluster 12        | Transatpks-Nrps | 134616      | Fengycin biosynthetic gene cluster (93% of genes show similarity)     |  |

Table S1. Continued.

| Strain clusters   | Type             | Length (bp) | Most similar known clusters                                             | Predicted core clusters                                                             |
|-------------------|------------------|-------------|-------------------------------------------------------------------------|-------------------------------------------------------------------------------------|
| <b>SRCM100730</b> |                  |             |                                                                         |                                                                                     |
| Cluster 13        | Transatpks-Nrps  | 60217       | Bacillaene biosynthetic gene cluster (42% of genes show similarity)     | 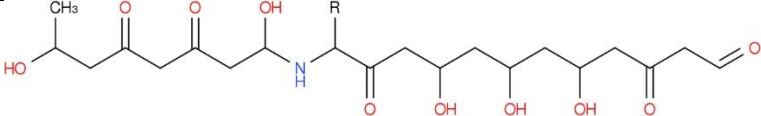 |
| Cluster 14        | Nrps             | 65407       | Surfactin biosynthetic gene cluster (82% of genes show similarity)      |  |
| Cluster 15        | Bacteriocin-Nrps | 66791       | Bacillibactin biosynthetic gene cluster (100% of genes show similarity) |  |

Table S1. Continued.

| Strain clusters | Type             | Length (bp) | Most similar known clusters                                           | Predicted core clusters                                                               |
|-----------------|------------------|-------------|-----------------------------------------------------------------------|---------------------------------------------------------------------------------------|
| <b>SQR9</b>     |                  |             |                                                                       |                                                                                       |
| Cluster 1       | Nrps             | 65407       | Surfactin biosynthetic gene cluster (78% of genes show similarity)    | 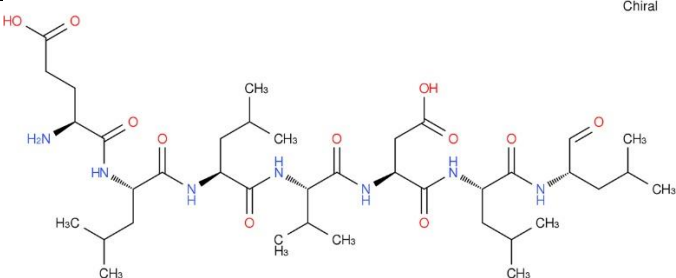   |
| Cluster 2       | Transatpks-T1pks | 110709      | Phormidolide biosynthetic gene cluster (26% of genes show similarity) |    |
| Cluster 3       | Otherks          | 41244       | Butirosin biosynthetic gene cluster (7% of genes show similarity)     | -                                                                                     |
| Cluster 4       | Terpene          | 20740       | -                                                                     | -                                                                                     |
| Cluster 5       | Transatpks       | 85890       | Macrolactin biosynthetic gene cluster (100% of genes show similarity) | -                                                                                     |
| Cluster 6       | Transatpks-Nrps  | 102671      | Bacillaene biosynthetic gene cluster (100% of genes show similarity)  |   |
| Cluster 7       | Transatpks-Nrps  | 137813      | Fengycin biosynthetic gene cluster (100% of genes show similarity)    |  |

Table S1. Continued.

| Strain clusters | Type             | Length (bp) | Most similar known clusters                                             | Predicted core clusters                                                             |
|-----------------|------------------|-------------|-------------------------------------------------------------------------|-------------------------------------------------------------------------------------|
| <b>SQR9</b>     |                  |             |                                                                         |                                                                                     |
| Cluster 8       | Terpene          | 21883       | -                                                                       | -                                                                                   |
| Cluster 9       | T3pks            | 41100       | -                                                                       | -                                                                                   |
| Cluster 10      | Transatpks       | 100453      | Difficidin biosynthetic gene cluster (100% of genes show similarity)    | 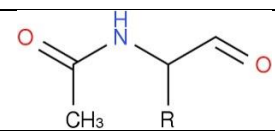 |
| Cluster 11      | Bacteriocin-Nrps | 66791       | Bacillibactin biosynthetic gene cluster (100% of genes show similarity) |  |
| Cluster 12      | Other            | 41418       | Bacilysin biosynthetic gene cluster (100% of genes show similarity)     | -                                                                                   |

Table S1. Continued.

| Strain clusters   | Type             | Length (bp) | Most similar known clusters                                             | Predicted core clusters                                                               |
|-------------------|------------------|-------------|-------------------------------------------------------------------------|---------------------------------------------------------------------------------------|
| <b>KCTC 13012</b> |                  |             |                                                                         |                                                                                       |
| Cluster 1         | Terpene          | 21883       | -                                                                       | -                                                                                     |
| Cluster 2         | T3pks            | 41100       | -                                                                       | -                                                                                     |
| Cluster 3         | Transatpks       | 100473      | Difficidin biosynthetic gene cluster (100% of genes show similarity)    | 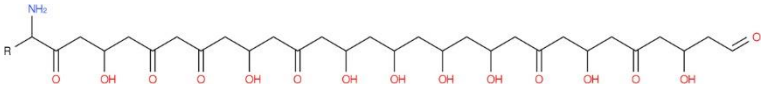   |
| Cluster 4         | Transatpks-Nrps  | 102677      | Bacillaene biosynthetic gene cluster (100% of genes show similarity)    |    |
| Cluster 5         | Transatpks       | 85902       | Macrolactin biosynthetic gene cluster (100% of genes show similarity)   | -                                                                                     |
| Cluster 6         | Terpene          | 20740       | -                                                                       | -                                                                                     |
| Cluster 7         | Otherks          | 41244       | Butirosin biosynthetic gene cluster (7% of genes show similarity)       | -                                                                                     |
| Cluster 8         | Transatpks-Nrps  | 88416       | Fengycin biosynthetic gene cluster (86% of genes show similarity)       |   |
| Cluster 9         | Nrps             | 23335       | -                                                                       | -                                                                                     |
| Cluster 10        | Bacteriocin-Nrps | 66793       | Bacillibactin biosynthetic gene cluster (100% of genes show similarity) |  |



Table S1. Continued.

| Strain clusters   | Type         | Length (bp) | Most similar known clusters                                          | Predicted core clusters |
|-------------------|--------------|-------------|----------------------------------------------------------------------|-------------------------|
| <b>KCTC 13012</b> |              |             |                                                                      |                         |
| Cluster 11        | Phosphonate  | 40884       | -                                                                    | -                       |
| Cluster 12        | Lantipeptide | 23984       | Mersacidin biosynthetic gene cluster (100% of genes show similarity) | -                       |
| Cluster 13        | Other        | 41418       | Bacilysin biosynthetic gene cluster (100% of genes show similarity)  | -                       |
| Cluster 14        | Nrps         | 42050       | -                                                                    | -                       |
| Cluster 15        | Nrps         | 27660       | Surfactin biosynthetic gene cluster (47% of genes show similarity)   |                         |
| Cluster 16        | Nrps         | 2587        | -                                                                    | -                       |
| Cluster 17        | Nrps         | 25221       | Surfactin biosynthetic gene cluster (39% of genes show similarity)   | -                       |
| Cluster 18        | Nrps         | 1961        | -                                                                    | -                       |
| Cluster 19        | Nrps         | 14360       | Fengycin biosynthetic gene cluster (33% of genes show similarity)    |                         |
| Cluster 20        | Nrps         | 9008        | Surfactin biosynthetic gene cluster (8% of genes show similarity)    |                         |

Table S1. Continued.

| Strain clusters   | Type | Length (bp) | Most similar known clusters                                       | Predicted core clusters                                                             |
|-------------------|------|-------------|-------------------------------------------------------------------|-------------------------------------------------------------------------------------|
| <b>KCTC 13012</b> |      |             |                                                                   |                                                                                     |
| Cluster 21        | Nrps | 10378       | Fengycin biosynthetic gene cluster (20% of genes show similarity) | 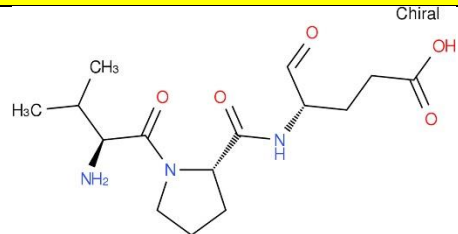 |
| Cluster 22        | Nrps | 1883        | -                                                                 | -                                                                                   |

Table S1. Continued.

| Strain clusters | Type             | Length (bp) | Most similar known clusters                                             | Predicted core clusters                                                               |
|-----------------|------------------|-------------|-------------------------------------------------------------------------|---------------------------------------------------------------------------------------|
| <b>NB91</b>     |                  |             |                                                                         |                                                                                       |
| Cluster 1       | Otherks          | 41244       | Butirosin biosynthetic gene cluster (7% of genes show similarity)       | -                                                                                     |
| Cluster 2       | Terpene          | 20740       | -                                                                       | -                                                                                     |
| Cluster 3       | Transatpks       | 85884       | Macrolactin biosynthetic gene cluster (100% of genes show similarity)   | 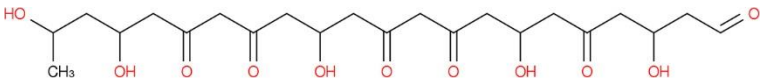   |
| Cluster 4       | Transatpks-Nrps  | 102698      | Bacillaene biosynthetic gene cluster (100% of genes show similarity)    |    |
| Cluster 5       | Transatpks-Nrps  | 88134       | Fengycin biosynthetic gene cluster (86% of genes show similarity)       |    |
| Cluster 6       | Other            | 41418       | Bacilysin biosynthetic gene cluster (100% of genes show similarity)     | -                                                                                     |
| Cluster 7       | Bacteriocin-Nrps | 66792       | Bacillibactin biosynthetic gene cluster (100% of genes show similarity) |  |
| Cluster 8       | Terpene          | 21883       | -                                                                       | -                                                                                     |
| Cluster 9       | T3pks            | 41100       | -                                                                       | -                                                                                     |
| Cluster 10      | Transatpks       | 100438      | Difficidin biosynthetic gene cluster (100% of genes show similarity)    |  |

Table S1. Continued.

| Strain clusters | Type | Length (bp) | Most similar known clusters                                          | Predicted core clusters                                                              |
|-----------------|------|-------------|----------------------------------------------------------------------|--------------------------------------------------------------------------------------|
| <b>NB91</b>     |      |             |                                                                      |                                                                                      |
| Cluster 11      | Nrps | 65407       | Surfactin biosynthetic gene cluster (82% of genes show similarity)   | 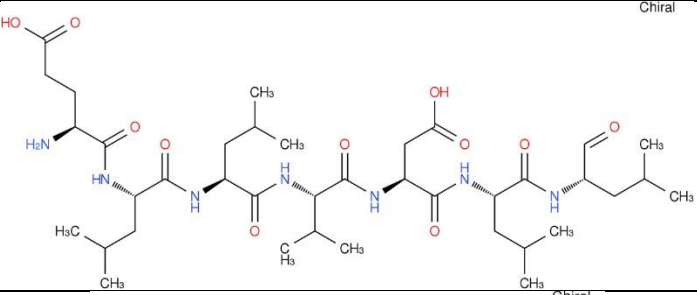  |
| Cluster 12      | Nrps | 15277       | Fengycin biosynthetic gene cluster (26% of genes show similarity)    |   |
| Cluster 13      | Nrps | 9685        | Fengycin biosynthetic gene cluster (13% of genes show similarity)    |  |
| Cluster 14      | Nrps | 8965        | Plipastatin biosynthetic gene cluster (30% of genes show similarity) | -                                                                                    |

Table S1. Continued.

| Strain clusters   | Type             | Length (bp) | Most similar known clusters                                             | Predicted core clusters                                                               |
|-------------------|------------------|-------------|-------------------------------------------------------------------------|---------------------------------------------------------------------------------------|
| <b>KACC 13105</b> |                  |             |                                                                         |                                                                                       |
| Cluster 1         | Nrps             | 36146       | Surfactin biosynthetic gene cluster (39% of genes show similarity)      | 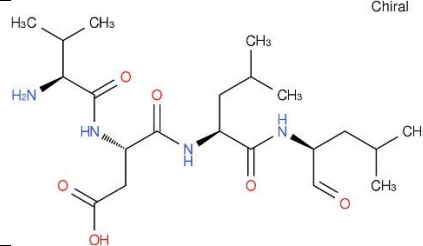   |
| Cluster 2         | Transatpks       | 85905       | Macrolactin biosynthetic gene cluster (100% of genes show similarity)   |    |
| Cluster 3         | Terpene          | 21883       | -                                                                       | -                                                                                     |
| Cluster 4         | Nrps             | 23186       | Plipastatin biosynthetic gene cluster (38% of genes show similarity)    | -                                                                                     |
| Cluster 5         | Transatpks-Nrps  | 114098      | Fengycin biosynthetic gene cluster (93% of genes show similarity)       |   |
| Cluster 6         | Transatpks       | 100453      | Difficidin biosynthetic gene cluster (100% of genes show similarity)    |  |
| Cluster 7         | T3pks            | 41100       | -                                                                       | -                                                                                     |
| Cluster 8         | Bacteriocin-Nrps | 66791       | Bacillibactin biosynthetic gene cluster (100% of genes show similarity) |  |

Table S1. Continued.

| Strain clusters   | Type             | Length (bp) | Most similar known clusters                                             | Predicted core clusters                                                               |
|-------------------|------------------|-------------|-------------------------------------------------------------------------|---------------------------------------------------------------------------------------|
| <b>KACC 13105</b> |                  |             |                                                                         |                                                                                       |
| Cluster 9         | Nrps             | 36146       | Surfactin biosynthetic gene cluster (39% of genes show similarity)      | 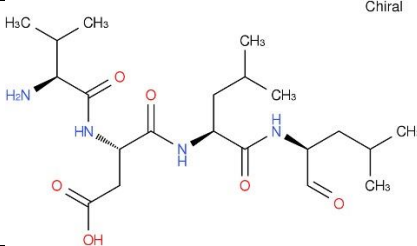   |
| Cluster 10        | Transatpks       | 85905       | Macrolactin biosynthetic gene cluster (100% of genes show similarity)   |    |
| Cluster 11        | Terpene          | 21883       | -                                                                       | -                                                                                     |
| Cluster 12        | Nrps             | 23186       | Plipastatin biosynthetic gene cluster (38% of genes show similarity)    | -                                                                                     |
| Cluster 13        | Transatpks-Nrps  | 114098      | Fengycin biosynthetic gene cluster (93% of genes show similarity)       |   |
| Cluster 14        | Transatpks       | 100453      | Difficidin biosynthetic gene cluster (100% of genes show similarity)    |  |
| Cluster 15        | T3pks            | 41100       | -                                                                       | -                                                                                     |
| Cluster 16        | Bacteriocin-Nrps | 66791       | Bacillibactin biosynthetic gene cluster (100% of genes show similarity) |  |

Table S1. Continued.

| Strain clusters   | Type            | Length (bp) | Most similar known clusters                                          | Predicted core clusters                                                             |
|-------------------|-----------------|-------------|----------------------------------------------------------------------|-------------------------------------------------------------------------------------|
| <b>KACC 13105</b> |                 |             |                                                                      |                                                                                     |
| Cluster 17        | Other           | 41418       | Bacilysin biosynthetic gene cluster (100% of genes show similarity)  | -                                                                                   |
| Cluster 18        | Transatpks-Nrps | 102674      | Bacillaene biosynthetic gene cluster (100% of genes show similarity) | 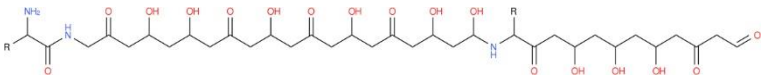 |
| Cluster 19        | Nrps            | 29170       | Surfactin biosynthetic gene cluster (52% of genes show similarity)   |  |
| Cluster 20        | Otherks         | 41244       | Butirosin biosynthetic gene cluster (7% of genes show similarity)    | -                                                                                   |
| Cluster 21        | Terpene         | 20740       | -                                                                    | -                                                                                   |
| Cluster 22        | Lantipeptide    | 28888       | -                                                                    | -                                                                                   |

Table S1. Continued.

| Strain clusters    | Type              | Length (bp) | Most similar known clusters                                             | Predicted core clusters                                                                                                                     |
|--------------------|-------------------|-------------|-------------------------------------------------------------------------|---------------------------------------------------------------------------------------------------------------------------------------------|
| <b>CFSAN034340</b> |                   |             |                                                                         |                                                                                                                                             |
| Cluster 1          | Terpene           | 20740       | -                                                                       | -                                                                                                                                           |
| Cluster 2          | Transatpks        | 28132       | Difficidin biosynthetic gene cluster (46% of genes show similarity)     | 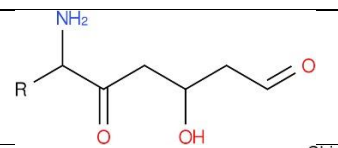 <chem>NC(=O)C(R)C(=O)C(O)C=O</chem>                     |
| Cluster 3          | Nrps              | 27638       | Surfactin biosynthetic gene cluster (47% of genes show similarity)      |  <chem>NC(=O)C(R)C(=O)C(O)C(=O)N[C@@H](C)C(=O)C=O</chem> |
| Cluster 4          | Nrps              | 25179       | Surfactin biosynthetic gene cluster (39% of genes show similarity)      | -                                                                                                                                           |
| Cluster 5          | Other             | 41418       | Bacilysin biosynthetic gene cluster (100% of genes show similarity)     | -                                                                                                                                           |
| Cluster 6          | Bacteriocin-Nrps  | 66792       | Bacillibactin biosynthetic gene cluster (100% of genes show similarity) |  <chem>NC(=O)C(R)C(=O)N[C@@H](C)C(=O)C=O</chem>         |
| Cluster 7          | Lantipeptide-Nrps | 38496       | Locillomycin biosynthetic gene cluster (35% of genes show similarity)   | -                                                                                                                                           |
| Cluster 8          | Nrps              | 22475       | Plipastatin biosynthetic gene cluster (30% of genes show similarity)    | -                                                                                                                                           |
| Cluster 9          | Terpene           | 21883       | -                                                                       | -                                                                                                                                           |
| Cluster 10         | T3pks             | 41100       | -                                                                       | -                                                                                                                                           |
| Cluster 11         | Transatpks        | 45652       | Difficidin biosynthetic gene cluster (53% of genes show similarity)     |  <chem>NC(=O)C(R)C(=O)C(O)C(=O)C(O)C=O</chem>          |
| Cluster 12         | Transatpks-Nrps   | 32808       | -                                                                       | -                                                                                                                                           |



Table S1. Continued.

| Strain clusters    | Type       | Length (bp) | Most similar known clusters                                           | Predicted core clusters                                                               |
|--------------------|------------|-------------|-----------------------------------------------------------------------|---------------------------------------------------------------------------------------|
| <b>CFSAN034340</b> |            |             |                                                                       |                                                                                       |
| Cluster 13         | Transatpks | 23278       | Difficidin biosynthetic gene cluster (26% of genes show similarity)   | 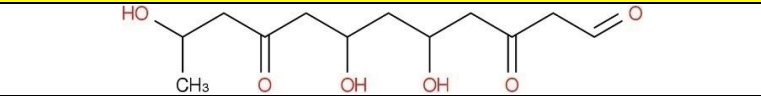   |
| Cluster 14         | Transatpks | 86193       | Macrolactin biosynthetic gene cluster (100% of genes show similarity) |    |
| Cluster 15         | Nrps       | 12704       | Fengycin biosynthetic gene cluster (20% of genes show similarity)     |    |
| Cluster 16         | Nrps       | 9119        | Fengycin biosynthetic gene cluster (13% of genes show similarity)     |   |
| Cluster 17         | Nrps       | 8944        | Surfactin biosynthetic gene cluster (8% of genes show similarity)     |  |
| Cluster 18         | Transatpks | 8685        | -                                                                     | -                                                                                     |
| Cluster 19         | Transatpks | 7213        | Bacillaene biosynthetic gene cluster (14% of genes show similarity)   | -                                                                                     |
| Cluster 20         | Nrps       | 6519        | -                                                                     | -                                                                                     |

Table S1. Continued.

| Strain clusters    | Type            | Length (bp) | Most similar known clusters                                         | Predicted core clusters                                                                                                                                            |
|--------------------|-----------------|-------------|---------------------------------------------------------------------|--------------------------------------------------------------------------------------------------------------------------------------------------------------------|
| <b>CFSAN034340</b> |                 |             |                                                                     |                                                                                                                                                                    |
| Cluster 21         | Other           | 3084        | -                                                                   | -                                                                                                                                                                  |
| Cluster 22         | Transatpks      | 31155       | Bacillaene biosynthetic gene cluster (28% of genes show similarity) | 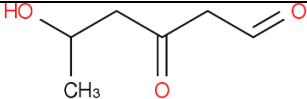 <chem>CC(O)CC(=O)CC=O</chem>                                                   |
| Cluster 23         | Transatpks-Nrps | 87560       | Fengycin biosynthetic gene cluster (80% of genes show similarity)   |                                                                                 |
| Cluster 24         | Nrps            | 1863        | -                                                                   | -                                                                                                                                                                  |
| Cluster 25         | Otherks         | 41244       | Butirosin biosynthetic gene cluster (7% of genes show similarity)   | -                                                                                                                                                                  |
| Cluster 26         | Transatpks-Nrps | 52635       | Bacillaene biosynthetic gene cluster (85% of genes show similarity) |  <chem>NC(=O)C(R)CC(=O)CC(O)CC(=O)CC(O)CC(=O)CC(O)CC(=O)CC(O)CC(=O)CC=O</chem> |

Table S1. Continued.

| Strain clusters | Type            | Length (bp) | Most similar known clusters                                           | Predicted core clusters                                                               |
|-----------------|-----------------|-------------|-----------------------------------------------------------------------|---------------------------------------------------------------------------------------|
| <b>NJN-6</b>    |                 |             |                                                                       |                                                                                       |
| Cluster 1       | Transatpks-Nrps | 77723       | Rhizoctin biosynthetic gene cluster (22% of genes show similarity)    | 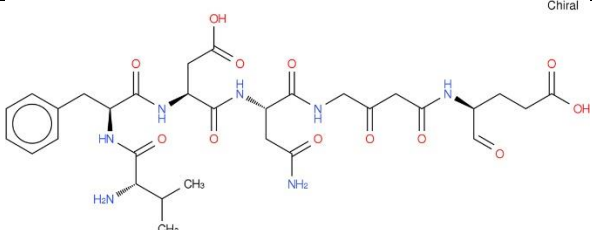   |
| Cluster 2       | Nrps            | 65406       | Surfactin biosynthetic gene cluster (78% of genes show similarity)    |    |
| Cluster 3       | Otherks         | 41244       | Butirosin biosynthetic gene cluster (7% of genes show similarity)     | -                                                                                     |
| Cluster 4       | Terpene         | 20740       | -                                                                     | -                                                                                     |
| Cluster 5       | Lantipeptide    | 28889       | -                                                                     | -                                                                                     |
| Cluster 6       | Transatpks      | 85887       | Macrolactin biosynthetic gene cluster (100% of genes show similarity) | -                                                                                     |
| Cluster 7       | Transatpks-Nrps | 102704      | Bacillaene biosynthetic gene cluster (100% of genes show similarity)  |  |
| Cluster 8       | Transatpks-Nrps | 13828       | Fengycin biosynthetic gene cluster (100% of genes show similarity)    |  |

Table S1. Continued.

| Strain clusters | Type             | Length (bp) | Most similar known clusters                                             | Predicted core clusters                                                             |
|-----------------|------------------|-------------|-------------------------------------------------------------------------|-------------------------------------------------------------------------------------|
| <b>NJN-6</b>    |                  |             |                                                                         |                                                                                     |
| Cluster 9       | Terpene          | 21883       | -                                                                       | -                                                                                   |
| Cluster 10      | T3pks            | 41100       | -                                                                       | -                                                                                   |
| Cluster 11      | Transatpks       | 100438      |                                                                         |                                                                                     |
| Cluster 12      | Bacteriocin-Nrps | 66792       | Bacillibactin biosynthetic gene cluster (100% of genes show similarity) | 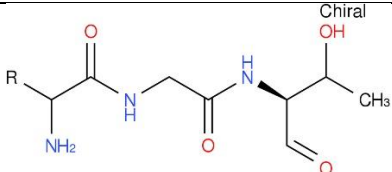 |
| Cluster 13      | Other            | 41418       | Bacilysin biosynthetic gene cluster (100% of genes show similarity)     | -                                                                                   |

Table S1. Continued.

| Strain clusters | Type             | Length (bp) | Most similar known clusters                                           | Predicted core clusters                                                               |
|-----------------|------------------|-------------|-----------------------------------------------------------------------|---------------------------------------------------------------------------------------|
| <b>GR4-5</b>    |                  |             |                                                                       |                                                                                       |
| Cluster 1       | Nrps             | 28112       | Surfactin biosynthetic gene cluster (43% of genes show similarity)    | 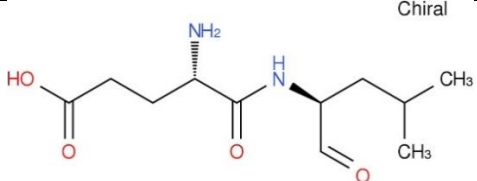   |
| Cluster 2       | Nrps             | 12207       | Surfactin biosynthetic gene cluster (8% of genes show similarity)     |    |
| Cluster 3       | Nrps             | 25694       | Surfactin biosynthetic gene cluster (39% of genes show similarity)    | -                                                                                     |
| Cluster 4       | Ladderane        | 41121       | -                                                                     | -                                                                                     |
| Cluster 5       | Nrps             | 27397       | Bacitracin biosynthetic gene cluster (55% of genes show similarity)   |   |
| Cluster 6       | Other            | 22533       | Bacitracin biosynthetic gene cluster (33% of genes show similarity)   | -                                                                                     |
| Cluster 7       | Otherks          | 41244       | Butirosin biosynthetic gene cluster (7% of genes show similarity)     | -                                                                                     |
| Cluster 8       | Terpene          | 20740       | -                                                                     | -                                                                                     |
| Cluster 9       | Transatpkps      | 85890       | Macrolactin biosynthetic gene cluster (100% of genes show similarity) |  |
| Cluster 10      | Transatpkps-Nrps | 102683      | Bacillaene biosynthetic gene cluster (100% of genes show similarity)  |  |

Table S1. Continued.

| Strain clusters | Type            | Length (bp) | Most similar known clusters                                         | Predicted core clusters                                                               |
|-----------------|-----------------|-------------|---------------------------------------------------------------------|---------------------------------------------------------------------------------------|
| <b>GR4-5</b>    |                 |             |                                                                     |                                                                                       |
| Cluster 11      | Transatpks-Nrps | 88084       | Fengycin_biosynthetic_gene_cluster (80% of genes show similarity)   | 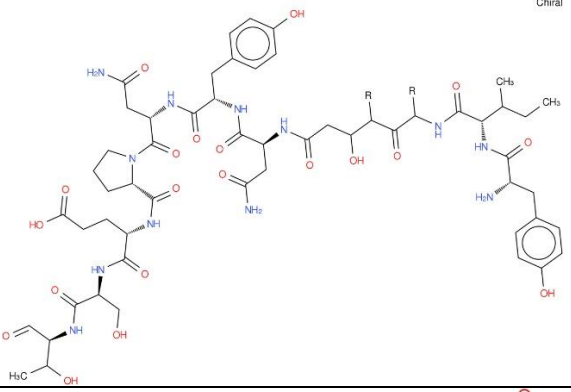   |
| Cluster 12      | Transatpks      | 24569       | Difficidin biosynthetic gene cluster (26% of genes show similarity) |    |
| Cluster 13      | Nrps            | 6577        | Bacitracin biosynthetic gene cluster (33% of genes show similarity) | -                                                                                     |
| Cluster 14      | Nrps            | 1880        | -                                                                   | -                                                                                     |
| Cluster 15      | Nrps            | 15022       | Fengycin biosynthetic gene cluster (20% of genes show similarity)   |   |
| Cluster 16      | Nrps            | 10690       | Fengycin biosynthetic gene cluster (20% of genes show similarity)   |  |

Table S1. Continued.

| Strain clusters | Type             | Length (bp) | Most similar known clusters                                             | Predicted core clusters                                                              |
|-----------------|------------------|-------------|-------------------------------------------------------------------------|--------------------------------------------------------------------------------------|
| <b>GR4-5</b>    |                  |             |                                                                         |                                                                                      |
| Cluster 17      | Nrps             | 21836       | Plipastatin biosynthetic gene cluster (30% of genes show similarity)    | -                                                                                    |
| Cluster 18      | Terpene          | 41883       | -                                                                       | -                                                                                    |
| Cluster 19      | T3pks            | 41100       | -                                                                       | -                                                                                    |
| Cluster 20      | Transatpks       | 47216       | Difficidin biosynthetic gene cluster (53% of genes show similarity)     | 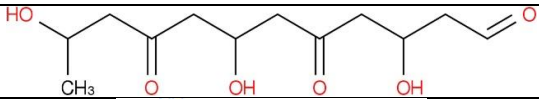  |
| Cluster 21      | Transatpks       | 28411       | Difficidin biosynthetic gene cluster (46% of genes show similarity)     |   |
| Cluster 22      | Bacteriocin-Nrps | 66792       | Bacillibactin biosynthetic gene cluster (100% of genes show similarity) |   |
| Cluster 23      | Other            | 41418       | Bacilysin biosynthetic gene cluster (100% of genes show similarity)     | -                                                                                    |
| Cluster 24      | Nrps             | 13235       | Bacitracin biosynthetic gene cluster (33% of genes show similarity)     |  |
| Cluster 25      | Nrps             | 4143        | -                                                                       | -                                                                                    |

Table S1. Continued.

| Strain clusters | Type            | Length (bp) | Most similar known clusters                                           | Predicted core clusters                                                               |
|-----------------|-----------------|-------------|-----------------------------------------------------------------------|---------------------------------------------------------------------------------------|
| <b>M75</b>      |                 |             |                                                                       |                                                                                       |
| Cluster 1       | Nrps            | 65407       | Surfactin biosynthetic gene cluster (82% of genes show similarity)    | 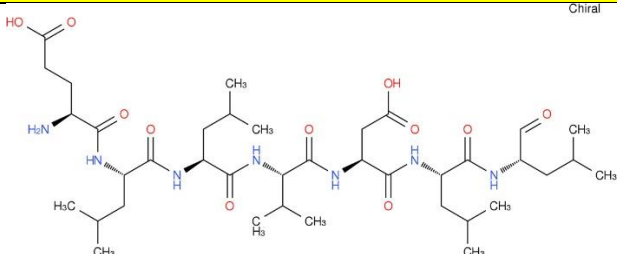   |
| Cluster 2       | Thiopeptide     | 27301       | Kijanamicin biosynthetic gene cluster (4% of genes show similarity)   | -                                                                                     |
| Cluster 3       | Otherks         | 41244       | Butirosin biosynthetic gene cluster (7% of genes show similarity)     | -                                                                                     |
| Cluster 4       | Terpene         | 20740       | -                                                                     | -                                                                                     |
| Cluster 5       | Lantipeptide    | 28889       | -                                                                     | -                                                                                     |
| Cluster 6       | Transatpks      | 85884       | Macrolactin biosynthetic gene cluster (100% of genes show similarity) | -                                                                                     |
| Cluster 7       | Transatpks-Nrps | 102701      | Bacillaene biosynthetic gene cluster (100% of genes show similarity)  |   |
| Cluster 8       | Transatpks-Nrps | 137829      | Fengycin biosynthetic gene cluster (100% of genes show similarity)    |  |
| Cluster 9       | Terpene         | 21883       | -                                                                     | -                                                                                     |



Table S1. Continued.

| Strain clusters | Type             | Length (bp) | Most similar known clusters                                             | Predicted core clusters                                                                                                               |
|-----------------|------------------|-------------|-------------------------------------------------------------------------|---------------------------------------------------------------------------------------------------------------------------------------|
| <b>M75</b>      |                  |             |                                                                         |                                                                                                                                       |
| Cluster 10      | T3pks            | 41100       | -                                                                       | -                                                                                                                                     |
| Cluster 11      | Transatpks       | 100447      | Difficidin biosynthetic gene cluster (100% of genes show similarity)    | 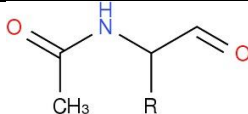 <chem>CC(=O)NC(R)C=O</chem>                       |
| Cluster 12      | Bacteriocin-Nrps | 66791       | Bacillibactin biosynthetic gene cluster (100% of genes show similarity) |  <chem>R[C@H](N)C(=O)NCC(=O)N[C@H](C)C(=O)O</chem> |
| Cluster 13      | Other            | 41418       | Bacilysin biosynthetic gene cluster (100% of genes show similarity)     | -                                                                                                                                     |

Table S1. Continued.

| Strain clusters | Type             | Length (bp) | Most similar known clusters                                             | Predicted core clusters                                                               |
|-----------------|------------------|-------------|-------------------------------------------------------------------------|---------------------------------------------------------------------------------------|
| <b>GB1</b>      |                  |             |                                                                         |                                                                                       |
| Cluster 1       | Phosphonate      | 40884       | -                                                                       | -                                                                                     |
| Cluster 2       | Nrps             | 65407       | Surfactin biosynthetic gene cluster (82% of genes show similarity)      | 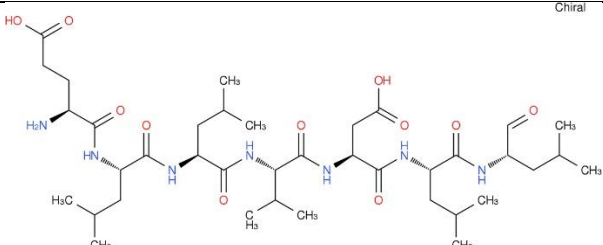   |
| Cluster 3       | Lantipeptide     | 23984       | Mersacidin biosynthetic gene cluster (100% of genes show similarity)    | -                                                                                     |
| Cluster 4       | Other            | 41418       | Bacilysin biosynthetic gene cluster (100% of genes show similarity)     | -                                                                                     |
| Cluster 5       | Nrps             | 68420       | -                                                                       | -                                                                                     |
| Cluster 6       | Bacteriocin-Nrps | 66793       | Bacillibactin biosynthetic gene cluster (100% of genes show similarity) |    |
| Cluster 7       | Transatpks       | 100453      | Difficidin biosynthetic gene cluster (100% of genes show similarity)    |   |
| Cluster 8       | T3pks            | 24956       | -                                                                       | -                                                                                     |
| Cluster 9       | Terpene          | 21883       | -                                                                       | -                                                                                     |
| Cluster 10      | Transatpks-Nrps  | 137832      | Fengycin biosynthetic gene cluster (100% of genes show similarity)      |  |

Table S1. Continued.

| Strain clusters | Type            | Length (bp) | Most similar known clusters                                           | Predicted core clusters                                                             |
|-----------------|-----------------|-------------|-----------------------------------------------------------------------|-------------------------------------------------------------------------------------|
| <b>GB1</b>      |                 |             |                                                                       |                                                                                     |
| Cluster 11      | Transatpks-Nrps | 102680      | Bacillaene biosynthetic gene cluster (100% of genes show similarity)  | 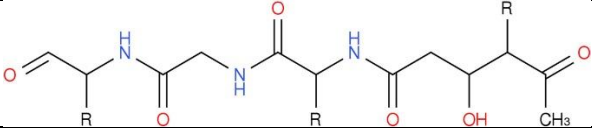 |
| Cluster 12      | Transatpks      | 85902       | Macrolactin biosynthetic gene cluster (100% of genes show similarity) | -                                                                                   |
| Cluster 13      | Terpene         | 20740       | -                                                                     | -                                                                                   |
| Cluster 14      | Otherks         | 41244       | Butirosin biosynthetic gene cluster (7% of genes show similarity)     | -                                                                                   |

Table S1. Continued.

| Strain clusters | Type            | Length (bp) | Most similar known clusters                                           | Predicted core clusters                                                              |
|-----------------|-----------------|-------------|-----------------------------------------------------------------------|--------------------------------------------------------------------------------------|
| <b>JTYP2</b>    |                 |             |                                                                       |                                                                                      |
| Cluster 1       | Nrps            | 65407       | Surfactin biosynthetic gene cluster (82% of genes show similarity)    | 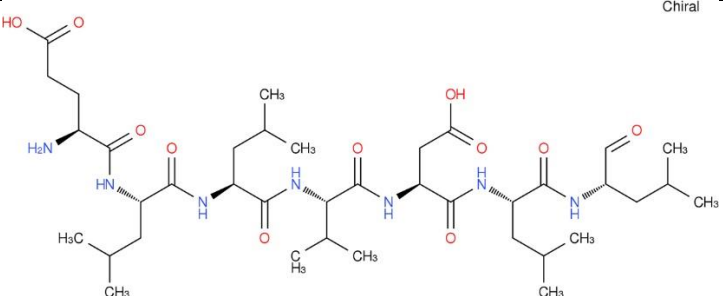  |
| Cluster 2       | Otherks         | 41244       | Butirosin biosynthetic gene cluster (7% of genes show similarity)     | -                                                                                    |
| Cluster 3       | Terpene         | 20740       | -                                                                     | -                                                                                    |
| Cluster 4       | Lantipeptide    | 28888       | -                                                                     | -                                                                                    |
| Cluster 5       | Transatpks      | 85904       | Macrolactin biosynthetic gene cluster (100% of genes show similarity) | -                                                                                    |
| Cluster 6       | Transatpks-Nrps | 102674      | Bacillaene biosynthetic gene cluster (100% of genes show similarity)  |   |
| Cluster 7       | Transatpks-Nrps | 137801      | Fengycin biosynthetic gene cluster (100% of genes show similarity)    |  |
| Cluster 8       | Terpene         | 21883       | -                                                                     | -                                                                                    |
| Cluster 9       | T3pks           | 41100       | -                                                                     | -                                                                                    |

Table S1. Continued.

| Strain clusters | Type             | Length (bp) | Most similar known clusters                                             | Predicted core clusters                                                             |
|-----------------|------------------|-------------|-------------------------------------------------------------------------|-------------------------------------------------------------------------------------|
| <b>JTYP2</b>    |                  |             |                                                                         |                                                                                     |
| Cluster 10      | Transatpks       | 100453      | Difficidin biosynthetic gene cluster (100% of genes show similarity)    | 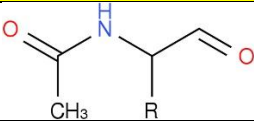 |
| Cluster 11      | Bacteriocin-Nrps | 66792       | Bacillibactin biosynthetic gene cluster (100% of genes show similarity) |  |
| Cluster 12      | Other            | 41418       | Bacilysin biosynthetic gene cluster (100% of genes show similarity)     | -                                                                                   |

Table S1. Continued.

| Strain clusters | Type            | Length (bp) | Most similar known clusters                                           | Predicted core clusters                                                                           |
|-----------------|-----------------|-------------|-----------------------------------------------------------------------|---------------------------------------------------------------------------------------------------|
| <b>HJ18-4</b>   |                 |             |                                                                       |                                                                                                   |
| Cluster 1       | Transatpks-Nrps | 77723       | Rhizoctin biosynthetic gene cluster (22% of genes show similarity)    | 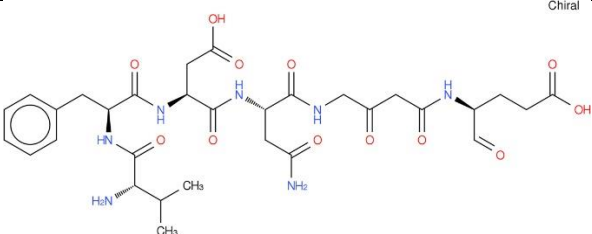 <p>Chiral</p> |
| Cluster 2       | Nrps            | 65434       | Surfactin biosynthetic gene cluster (78% of genes show similarity)    |  <p>Chiral</p> |
| Cluster 3       | Otherks         | 41244       | Butirosin biosynthetic gene cluster (7% of genes show similarity)     | -                                                                                                 |
| Cluster 4       | Terpene         | 20740       | -                                                                     | -                                                                                                 |
| Cluster 5       | Lantipeptide    | 28889       | -                                                                     | -                                                                                                 |
| Cluster 6       | Transatpks      | 85890       | Macrolactin biosynthetic gene cluster (100% of genes show similarity) | -                                                                                                 |
| Cluster 7       | Transatpks-Nrps | 102689      | Bacillaene biosynthetic gene cluster (100% of genes show similarity)  |              |
| Cluster 8       | Transatpks-Nrps | 137838      | Fengycin biosynthetic gene cluster (100% of genes show similarity)    |              |

Table S1. Continued.

| Strain clusters | Type             | Length (bp) | Most similar known clusters                                             | Predicted core clusters                                                             |
|-----------------|------------------|-------------|-------------------------------------------------------------------------|-------------------------------------------------------------------------------------|
| <b>HJ18-4</b>   |                  |             |                                                                         |                                                                                     |
| Cluster 9       | Terpene          | 21883       | -                                                                       | -                                                                                   |
| Cluster 10      | T3pks            | 41100       | -                                                                       | -                                                                                   |
| Cluster 11      | Transatpks       | 100435      | Difficidin biosynthetic gene cluster (100% of genes show similarity)    | 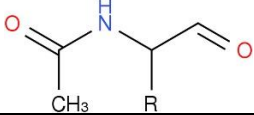 |
| Cluster 12      | Bacteriocin-Nrps | 66793       | Bacillibactin biosynthetic gene cluster (100% of genes show similarity) |  |
| Cluster 13      | Other            | 41418       | Bacilysin biosynthetic gene cluster (100% of genes show similarity)     | -                                                                                   |

Table S1. Continued.

| Strain clusters    | Type             | Length (bp) | Most similar known clusters                                             | Predicted core clusters                                                               |
|--------------------|------------------|-------------|-------------------------------------------------------------------------|---------------------------------------------------------------------------------------|
| <b>CFSAN034339</b> |                  |             |                                                                         |                                                                                       |
| Cluster 1          | Bacteriocin-Nrps | 66055       | Bacillibactin biosynthetic gene cluster (100% of genes show similarity) | 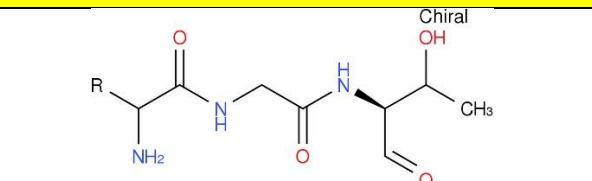   |
| Cluster 2          | Transatpks       | 23024       | Difficidin biosynthetic gene cluster (26% of genes show similarity)     |    |
| Cluster 3          | Nrps             | 13961       | Fengycin biosynthetic gene cluster (20% of genes show similarity)       |    |
| Cluster 4          | Nrps             | 10021       | Surfactin biosynthetic gene cluster (8% of genes show similarity)       |   |
| Cluster 5          | Nrps             | 9308        | Fengycin biosynthetic gene cluster (13% of genes show similarity)       |  |
| Cluster 6          | Otherks          | 41244       | Butirosin biosynthetic gene cluster (7% of genes show similarity)       | -                                                                                     |



Table S1. Continued.

| Strain clusters    | Type            | Length (bp) | Most similar known clusters                                           | Predicted core clusters                                                             |
|--------------------|-----------------|-------------|-----------------------------------------------------------------------|-------------------------------------------------------------------------------------|
| <b>CFSAN034339</b> |                 |             |                                                                       |                                                                                     |
| Cluster 7          | Terpene         | 20740       | -                                                                     | -                                                                                   |
| Cluster 8          | Transatpks      | 85892       | Macrolactin biosynthetic gene cluster (100% of genes show similarity) | 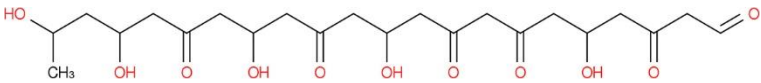 |
| Cluster 9          | Transatpks-Nrps | 102671      | Bacillaene biosynthetic gene cluster (100% of genes show similarity)  |  |
| Cluster 10         | Transatpks-Nrps | 87722       | Fengycin biosynthetic gene cluster (80% of genes show similarity)     |  |
| Cluster 11         | Transatpks      | 28377       | Difficidin biosynthetic gene cluster (46% of genes show similarity)   |  |
| Cluster 12         | Other           | 41418       | Bacilysin biosynthetic gene cluster (100% of genes show similarity)   | -                                                                                   |
| Cluster 13         | Nrps            | 39773       | -                                                                     | -                                                                                   |
| Cluster 14         | Lantipeptide    | 27057       | Subtilin biosynthetic gene cluster (100% of genes show similarity)    | -                                                                                   |
| Cluster 15         | T3pks           | 41100       | -                                                                     | -                                                                                   |
| Cluster 16         | Terpene         | 21883       | -                                                                     | -                                                                                   |
| Cluster 17         | Nrps            | 23565       | Plipastatin biosynthetic gene cluster (38% of genes show similarity)  | -                                                                                   |
| Cluster 18         | Nrps            | 25682       | Surfactin biosynthetic gene cluster (39% of genes show similarity)    | -                                                                                   |

Table S1. Continued.

| Strain clusters    | Type            | Length (bp) | Most similar known clusters                                         | Predicted core clusters                                                             |
|--------------------|-----------------|-------------|---------------------------------------------------------------------|-------------------------------------------------------------------------------------|
| <b>CFSAN034339</b> |                 |             |                                                                     |                                                                                     |
| Cluster 19         | Transatpks-Nrps | 77735       | Rhizoctin biosynthetic gene cluster (22% of genes show similarity)  | 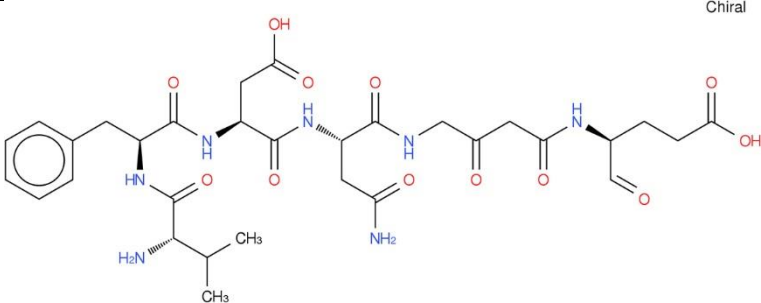 |
| Cluster 20         | Nrps            | 28212       | Surfactin biosynthetic gene cluster (47% of genes show similarity)  |  |
| Cluster 21         | Transatpks      | 46427       | Difficidin biosynthetic gene cluster (53% of genes show similarity) |  |

Table S1. Continued.

| Strain clusters | Type            | Length (bp) | Most similar known clusters                                           | Predicted core clusters                                                              |
|-----------------|-----------------|-------------|-----------------------------------------------------------------------|--------------------------------------------------------------------------------------|
| <b>CH13</b>     |                 |             |                                                                       |                                                                                      |
| Cluster 1       | Nrps            | 65632       | Surfactin biosynthetic gene cluster (91% of genes show similarity)    | 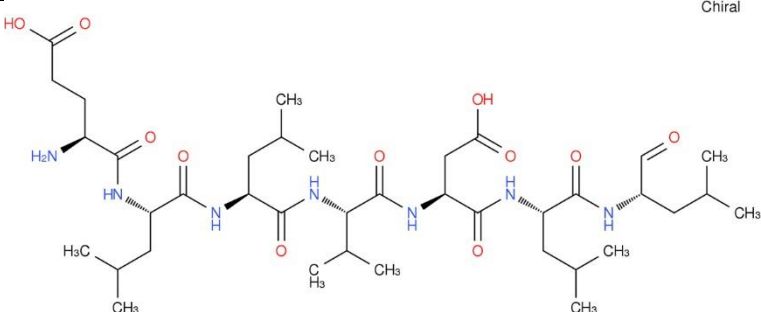  |
| Cluster 2       | Otherks         | 41244       | Butirosin biosynthetic gene cluster (7% of genes show similarity)     | -                                                                                    |
| Cluster 3       | Terpene         | 20740       | -                                                                     | -                                                                                    |
| Cluster 4       | Transatpks      | 85899       | Macrolactin biosynthetic gene cluster (100% of genes show similarity) |   |
| Cluster 5       | Transatpks-Nrps | 102683      | Bacillaene biosynthetic gene cluster (100% of genes show similarity)  |   |
| Cluster 6       | Transatpks-Nrps | 114360      | Fengycin biosynthetic gene cluster (93% of genes show similarity)     |  |
| Cluster 7       | Nrps            | 22514       | Plipastatin_biosynthetic_gene_c luster (30% of genes show similarity) | -                                                                                    |
| Cluster 8       | Terpene         | 21883       | -                                                                     | -                                                                                    |

Table S1. Continued.

| Strain clusters | Type             | Length (bp) | Most similar known clusters                                             | Predicted core clusters                                                             |
|-----------------|------------------|-------------|-------------------------------------------------------------------------|-------------------------------------------------------------------------------------|
| <b>CH13</b>     |                  |             |                                                                         |                                                                                     |
| Cluster 9       | T3pks            | 41100       | -                                                                       | -                                                                                   |
| Cluster 10      | Transatpks       | 71039       | Difficidin biosynthetic gene cluster (66% of genes show similarity)     | 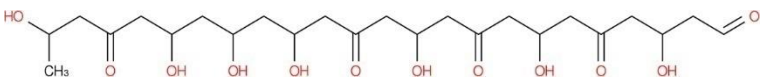 |
| Cluster 11      | Transatpks       | 28584       | Difficidin biosynthetic gene cluster (46% of genes show similarity)     |  |
| Cluster 12      | Nrps             | 30002       | -                                                                       | -                                                                                   |
| Cluster 13      | Nrps             | 22198       | -                                                                       | -                                                                                   |
| Cluster 14      | Bacteriocin-Nrps | 66791       | Bacillibactin biosynthetic gene cluster (100% of genes show similarity) |  |
| Cluster 15      | Other            | 41418       | Bacilysin biosynthetic gene cluster (100% of genes show similarity)     | -                                                                                   |

Table S1. Continued.

| Strain clusters | Type            | Length (bp) | Most similar known clusters                                           | Predicted core clusters                                                               |
|-----------------|-----------------|-------------|-----------------------------------------------------------------------|---------------------------------------------------------------------------------------|
| <b>GHI-13</b>   |                 |             |                                                                       |                                                                                       |
| Cluster 1       | Transatpks-Nrps | 77727       | Rhizoctin biosynthetic gene cluster (22% of genes show similarity)    | 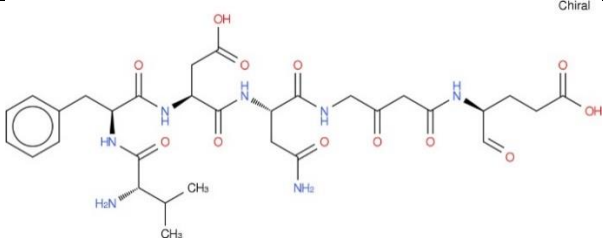   |
| Cluster 2       | Nrps            | 65410       | Surfactin biosynthetic gene cluster (82% of genes show similarity)    |    |
| Cluster 3       | Otherks         | 41244       | Butirosin biosynthetic gene cluster (7% of genes show similarity)     | -                                                                                     |
| Cluster 4       | Terpene         | 20740       | -                                                                     | -                                                                                     |
| Cluster 5       | Transatpks      | 85884       | Macrolactin biosynthetic gene cluster (100% of genes show similarity) | -                                                                                     |
| Cluster 6       | Transatpks-Nrps | 102701      | Bacillaene biosynthetic gene cluster (100% of genes show similarity)  |  |
| Cluster 7       | Transatpks-Nrps | 137853      | Fengycin biosynthetic gene cluster (100% of genes show similarity)    |  |

Table S1. Continued.

| Strain clusters | Type             | Length (bp) | Most similar known clusters                                             | Predicted core clusters                                                                                                                                                                                                                                                                                                                                                             |
|-----------------|------------------|-------------|-------------------------------------------------------------------------|-------------------------------------------------------------------------------------------------------------------------------------------------------------------------------------------------------------------------------------------------------------------------------------------------------------------------------------------------------------------------------------|
| <b>GHI-13</b>   |                  |             |                                                                         |                                                                                                                                                                                                                                                                                                                                                                                     |
| Cluster 8       | Terpene          | 21883       | -                                                                       | -                                                                                                                                                                                                                                                                                                                                                                                   |
| Cluster 9       | T3pks            | 41100       | -                                                                       | -                                                                                                                                                                                                                                                                                                                                                                                   |
| Cluster 10      | Transatpks       | 100447      | Difficidin biosynthetic gene cluster (100% of genes show similarity)    | 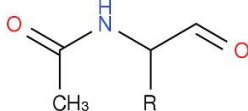 <p>Chemical structure of Difficidin, a cyclic peptide antibiotic. It features a central ring with an amide group (CH<sub>3</sub>-C(=O)-NH-) and a side chain containing a chiral center (R) and a terminal aldehyde group (-CHO).</p>                                                           |
| Cluster 11      | Bacteriocin-Nrps | 66793       | Bacillibactin biosynthetic gene cluster (100% of genes show similarity) |  <p>Chemical structure of Bacillibactin, a cyclic peptide antibiotic. It features a central ring with an amide group (NH-C(=O)-) and a side chain containing a chiral center (CH<sub>3</sub>-CH(OH)-) and a terminal aldehyde group (-CHO). The structure is labeled with 'Chiral' and 'OH'.</p> |
| Cluster 12      | Other            | 41418       | Bacilysin biosynthetic gene cluster (100% of genes show similarity)     | -                                                                                                                                                                                                                                                                                                                                                                                   |
| Cluster 13      | Lantipeptide     | 23983       | Mersacidin biosynthetic gene cluster (100% of genes show similarity)    | -                                                                                                                                                                                                                                                                                                                                                                                   |

Table S1. Continued.

| Strain clusters | Type            | Length (bp) | Most similar known clusters                                           | Predicted core clusters                                                               |
|-----------------|-----------------|-------------|-----------------------------------------------------------------------|---------------------------------------------------------------------------------------|
| <b>AH159-1</b>  |                 |             |                                                                       |                                                                                       |
| Cluster 1       | Nrps            | 9337        | Fengycin biosynthetic gene cluster (13% of genes show similarity)     | 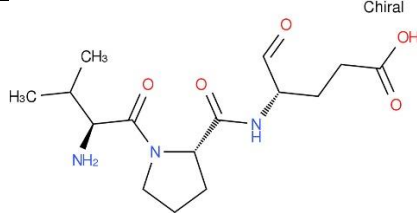   |
| Cluster 2       | Nrps            | 29784       | Fengycin biosynthetic gene cluster (73% of genes show similarity)     |    |
| Cluster 3       | Transatpks-Nrps | 41926       | Bacillomycin biosynthetic gene cluster (60% of genes show similarity) |   |
| Cluster 4       | Transatpks      | 10567       | Bacillaene biosynthetic gene cluster (14% of genes show similarity)   |  |
| Cluster 5       | Transatpks-Nrps | 21950       | Bacillaene biosynthetic gene cluster (35% of genes show similarity)   |  |
| Cluster 6       | Transatpks-Nrps | 47403       | Bacillaene biosynthetic gene cluster (85% of genes show similarity)   |  |

Table S1. Continued.

| Strain clusters | Type         | Length (bp) | Most similar known clusters                                          | Predicted core clusters                                                               |
|-----------------|--------------|-------------|----------------------------------------------------------------------|---------------------------------------------------------------------------------------|
| <b>AH159-1</b>  |              |             |                                                                      |                                                                                       |
| Cluster 7       | Transatpks   | 71015       | Macrolactin biosynthetic gene cluster (90% of genes show similarity) | 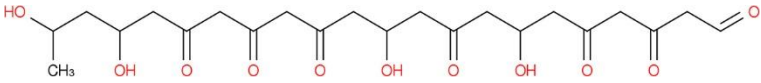   |
| Cluster 8       | Terpene      | 15536       | -                                                                    | -                                                                                     |
| Cluster 9       | Nrps         | 2846        | -                                                                    | -                                                                                     |
| Cluster 10      | Terpene      | 14261       | -                                                                    | -                                                                                     |
| Cluster 11      | T3pks        | 15359       | -                                                                    | -                                                                                     |
| Cluster 12      | Transatpks   | 30066       | Difficidin biosynthetic gene cluster (33% of genes show similarity)  |    |
| Cluster 13      | Transatpks   | 15801       | Difficidin biosynthetic gene cluster (26% of genes show similarity)  |    |
| Cluster 14      | Transatpks   | 22943       | Difficidin biosynthetic gene cluster (26% of genes show similarity)  |    |
| Cluster 15      | Transatpks   | 14496       | Difficidin biosynthetic gene cluster (46% of genes show similarity)  |    |
| Cluster 16      | Lantipeptide | 2029        | -                                                                    | -                                                                                     |
| Cluster 17      | Other        | 24406       | Bacilysin biosynthetic gene cluster (100% of genes show similarity)  | -                                                                                     |
| Cluster 18      | Nrps         | 7132        | Surfactin biosynthetic gene cluster (21% of genes show similarity)   | -                                                                                     |
| Cluster 19      | Nrps         | 9506        | Surfactin biosynthetic gene cluster (8% of genes show similarity)    |  |
| Cluster 20      | Nrps         | 27847       | Surfactin biosynthetic gene cluster (47% of genes show similarity)   |  |



Table S1. Continued.

| Strain clusters | Type        | Length (bp) | Most similar known clusters                                             | Predicted core clusters                                                             |
|-----------------|-------------|-------------|-------------------------------------------------------------------------|-------------------------------------------------------------------------------------|
| <b>AH159-1</b>  |             |             |                                                                         |                                                                                     |
| Cluster 21      | Bacteriocin | 8561        | Amylocyclicin biosynthetic gene cluster (100% of genes show similarity) | -                                                                                   |
| Cluster 22      | Nrps        | 30192       | Bacillibactin biosynthetic gene cluster (100% of genes show similarity) | 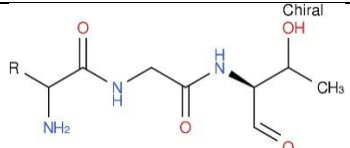 |
| Cluster 23      | Ladderane   | 41121       | -                                                                       | -                                                                                   |
| Cluster 24      | Nrps        | 12665       | Fengycin biosynthetic gene cluster (20% of genes show similarity)       |  |

Table S1. Continued.

| Strain clusters | Type             | Length (bp) | Most similar known clusters                                             | Predicted core clusters                                                               |
|-----------------|------------------|-------------|-------------------------------------------------------------------------|---------------------------------------------------------------------------------------|
| <b>2A-2B</b>    |                  |             |                                                                         |                                                                                       |
| Cluster 1       | Transatpks       | 85899       | Macrolactin biosynthetic gene cluster (100% of genes show similarity)   | 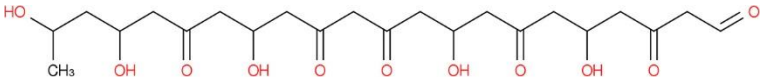   |
| Cluster 2       | Transatpks-Nrps  | 102686      | Bacillaene biosynthetic gene cluster (100% of genes show similarity)    |    |
| Cluster 3       | Transatpks-Nrps  | 87921       | Fengycin biosynthetic gene cluster (80% of genes show similarity)       |    |
| Cluster 4       | Bacteriocin-Nrps | 66791       | Bacillibactin biosynthetic gene cluster (100% of genes show similarity) |   |
| Cluster 5       | Nrps             | 35335       | -                                                                       | -                                                                                     |
| Cluster 6       | Terpene          | 21883       | -                                                                       | -                                                                                     |
| Cluster 7       | T3pks            | 41100       | -                                                                       | -                                                                                     |
| Cluster 8       | Transatpks       | 45760       | Difficidin biosynthetic gene cluster (53% of genes show similarity)     |  |
| Cluster 9       | Transatpks       | 28251       | Difficidin biosynthetic gene cluster (46% of genes show similarity)     |  |

Table S1. Continued.

| Strain clusters | Type       | Length (bp) | Most similar known clusters                                         | Predicted core clusters |
|-----------------|------------|-------------|---------------------------------------------------------------------|-------------------------|
| <b>2A-2B</b>    |            |             |                                                                     |                         |
| Cluster 10      | Terpene    | 20740       | -                                                                   | -                       |
| Cluster 11      | Otherks    | 41244       | Butirosin biosynthetic gene cluster (7% of genes show similarity)   | -                       |
| Cluster 12      | Other      | 41418       | Bacilysin biosynthetic gene cluster (100% of genes show similarity) | -                       |
| Cluster 13      | Nrps       | 24050       | -                                                                   | -                       |
| Cluster 14      | Nrps       | 28056       | Surfactin biosynthetic gene cluster (47% of genes show similarity)  | <p>Chiral</p>           |
| Cluster 15      | Transatpks | 22899       | Difficidin biosynthetic gene cluster (26% of genes show similarity) |                         |
| Cluster 16      | Nrps       | 15095       | Surfactin biosynthetic gene cluster (39% of genes show similarity)  | -                       |
| Cluster 17      | Nrps       | 12809       | Fengycin biosynthetic gene cluster (26% of genes show similarity)   | <p>Chiral</p>           |
| Cluster 18      | Nrps       | 9454        | Fengycin biosynthetic gene cluster (20% of genes show similarity)   | <p>Chiral</p>           |

Table S1. Continued.

| Strain clusters | Type | Length (bp) | Most similar known clusters                                       | Predicted core clusters                                                                                                     |
|-----------------|------|-------------|-------------------------------------------------------------------|-----------------------------------------------------------------------------------------------------------------------------|
| <b>2A-2B</b>    |      |             |                                                                   |                                                                                                                             |
| Cluster 19      | Nrps | 8988        | Surfactin biosynthetic gene cluster (8% of genes show similarity) | <div> <div> 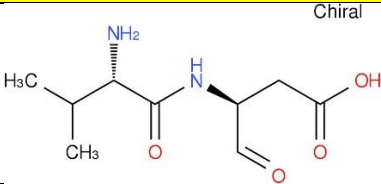 <p>Chiral</p> </div> </div> |
| Cluster 20      | Nrps | 7816        | -                                                                 | -                                                                                                                           |
| Cluster 21      | Nrps | 1482        | -                                                                 | -                                                                                                                           |
| Cluster 22      | Nrps | 1413        | -                                                                 | -                                                                                                                           |

Table S1. Continued.

| Strain clusters     | Type             | Length (bp) | Most similar known clusters                                             | Predicted core clusters                                                               |
|---------------------|------------------|-------------|-------------------------------------------------------------------------|---------------------------------------------------------------------------------------|
| <b>ARYD01000001</b> |                  |             |                                                                         |                                                                                       |
| Cluster 1           | Nrps             | 23248       | -                                                                       | -                                                                                     |
| Cluster 2           | Other            | 41418       | Bacilysin biosynthetic gene cluster (100% of genes show similarity)     | -                                                                                     |
| Cluster 3           | Otherks          | 41244       | Butirosin biosynthetic gene cluster (7% of genes show similarity)       | -                                                                                     |
| Cluster 4           | Terpene          | 20740       | -                                                                       | -                                                                                     |
| Cluster 5           | Transatpks-Nrps  | 99966       | Bacillaene biosynthetic gene cluster (100% of genes show similarity)    | 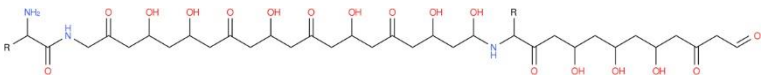   |
| Cluster 6           | Transatpks       | 45842       | Difficidin biosynthetic gene cluster (53% of genes show similarity)     | -                                                                                     |
| Cluster 7           | T3pks            | 41100       | -                                                                       | -                                                                                     |
| Cluster 8           | Transatpks       | 85902       | Macrolactin biosynthetic gene cluster (100% of genes show similarity)   |    |
| Cluster 9           | Bacteriocin-Nrps | 65849       | Bacillibactin biosynthetic gene cluster (100% of genes show similarity) |   |
| Cluster 10          | Transatpks-Nrps  | 88037       | Fengycin biosynthetic gene cluster (86% of genes show similarity)       |  |

Table S1. Continued.

| Strain clusters     | Type        | Length (bp) | Most similar known clusters                                          | Predicted core clusters                                                               |
|---------------------|-------------|-------------|----------------------------------------------------------------------|---------------------------------------------------------------------------------------|
| <b>ARYD01000001</b> |             |             |                                                                      |                                                                                       |
| Cluster 11          | Transatpks  | 28283       | Difficidin biosynthetic gene cluster (46% of genes show similarity)  | 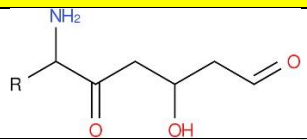   |
| Cluster 12          | Nrps        | 27868       | Surfactin biosynthetic gene cluster (47% of genes show similarity)   |    |
| Cluster 13          | Phosphonate | 40890       | -                                                                    | -                                                                                     |
| Cluster 14          | Terpene     | 21883       | -                                                                    | -                                                                                     |
| Cluster 15          | Nrps        | 21780       | Plipastatin biosynthetic gene cluster (30% of genes show similarity) | -                                                                                     |
| Cluster 16          | Transatpks  | 23101       | Difficidin biosynthetic gene cluster (26% of genes show similarity)  |    |
| Cluster 17          | Nrps        | 15228       | Surfactin biosynthetic gene cluster (39% of genes show similarity)   | -                                                                                     |
| Cluster 18          | Nrps        | 13069       | Fengycin biosynthetic gene cluster (20% of genes show similarity)    |   |
| Cluster 19          | Nrps        | 9721        | Surfactin biosynthetic gene cluster (8% of genes show similarity)    |  |

Table S1. Continued.

| Strain clusters     | Type | Length (bp) | Most similar known clusters                                       | Predicted core clusters                                                             |
|---------------------|------|-------------|-------------------------------------------------------------------|-------------------------------------------------------------------------------------|
| <b>ARYD01000001</b> |      |             |                                                                   |                                                                                     |
| Cluster 20          | Nrps | 9091        | Fengycin biosynthetic gene cluster (13% of genes show similarity) | 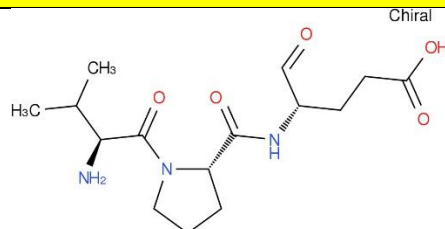 |
| Cluster 21          | Nrps | 6895        | -                                                                 | -                                                                                   |
| Cluster 22          | Nrps | 6499        | -                                                                 | -                                                                                   |

Table S1. Continued.

| Strain clusters | Type                        | Length (bp) | Most similar known clusters                                           | Predicted core clusters                                                               |
|-----------------|-----------------------------|-------------|-----------------------------------------------------------------------|---------------------------------------------------------------------------------------|
| <b>9D-6</b>     |                             |             |                                                                       |                                                                                       |
| Cluster 1       | Other                       | 41418       | Bacilysin biosynthetic gene cluster (100% of genes show similarity)   | -                                                                                     |
| Cluster 2       | Nrps                        | 65407       | Surfactin biosynthetic gene cluster (91% of genes show similarity)    | 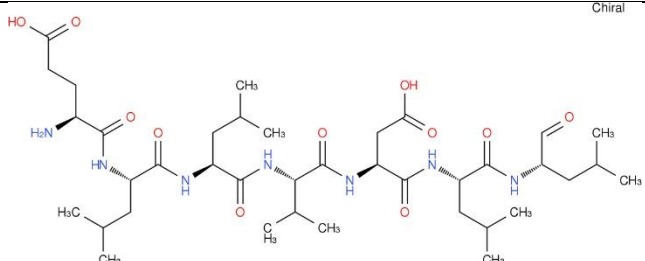   |
| Cluster 3       | Ladderane                   | 41121       | -                                                                     | -                                                                                     |
| Cluster 4       | Otherks                     | 41244       | Butirosin biosynthetic gene cluster (7% of genes show similarity)     | -                                                                                     |
| Cluster 5       | Terpene                     | 20740       | -                                                                     | -                                                                                     |
| Cluster 6       | Lantipeptide                | 28888       | -                                                                     | -                                                                                     |
| Cluster 7       | Transatpks                  | 85893       | Macrolactin biosynthetic gene cluster (100% of genes show similarity) | -                                                                                     |
| Cluster 8       | Transatpks-Nrps             | 102686      | Bacillaene biosynthetic gene cluster (100% of genes show similarity)  |   |
| Cluster 9       | Bacteriocin-Transatpks-Nrps | 125093      | Fengycin biosynthetic gene cluster (93% of genes show similarity)     |  |



Table S1. Continued.

| Strain clusters | Type             | Length (bp) | Most similar known clusters                                             | Predicted core clusters                                                             |
|-----------------|------------------|-------------|-------------------------------------------------------------------------|-------------------------------------------------------------------------------------|
| <b>9D-6</b>     |                  |             |                                                                         |                                                                                     |
| Cluster 10      | Terpene          | 21883       | -                                                                       | -                                                                                   |
| Cluster 11      | T3pks            | 41100       | -                                                                       | -                                                                                   |
| Cluster 12      | Transatpks       | 100453      | Difficidin biosynthetic gene cluster (100% of genes show similarity)    | 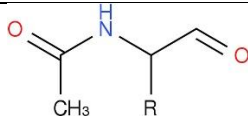 |
| Cluster 13      | Bacteriocin-Nrps | 66810       | Bacillibactin biosynthetic gene cluster (100% of genes show similarity) |  |

Table S1. Continued.

| Strain clusters | Type            | Length (bp) | Most similar known clusters                                           | Predicted core clusters                                                              |
|-----------------|-----------------|-------------|-----------------------------------------------------------------------|--------------------------------------------------------------------------------------|
| <b>GQJK49</b>   |                 |             |                                                                       |                                                                                      |
| Cluster 1       | Nrps            | 65407       | Surfactin biosynthetic gene cluster (82% of genes show similarity)    | 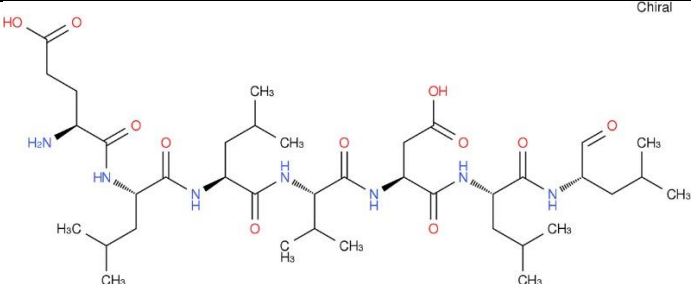  |
| Cluster 2       | Otherks         | 41244       | Butirosin biosynthetic gene cluster (7% of genes show similarity)     | -                                                                                    |
| Cluster 3       | Terpene         | 20740       | -                                                                     | -                                                                                    |
| Cluster 4       | Lantipeptide    | 28888       | -                                                                     | -                                                                                    |
| Cluster 5       | Transatpks      | 85905       | Macrolactin biosynthetic gene cluster (100% of genes show similarity) | -                                                                                    |
| Cluster 6       | Transatpks-Nrps | 102674      | Bacillaene biosynthetic gene cluster (100% of genes show similarity)  |   |
| Cluster 7       | Transatpks-Nrps | 137800      | Fengycin biosynthetic gene cluster (100% of genes show similarity)    |  |
| Cluster 8       | Terpene         | 21883       | -                                                                     | -                                                                                    |
| Cluster 9       | T3pks           | 41100       | -                                                                     | -                                                                                    |

Table S1. Continued.

| Strain clusters | Type             | Length (bp) | Most similar known clusters                                             | Predicted core clusters                                                             |
|-----------------|------------------|-------------|-------------------------------------------------------------------------|-------------------------------------------------------------------------------------|
| <b>GQJK49</b>   |                  |             |                                                                         |                                                                                     |
| Cluster 10      | Transatpks       | 100452      | Difficidin biosynthetic gene cluster (100% of genes show similarity)    | 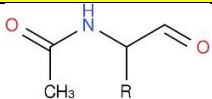 |
| Cluster 11      | Bacteriocin-Nrps | 66791       | Bacillibactin biosynthetic gene cluster (100% of genes show similarity) |  |
| Cluster 12      | Other            | 41418       | Bacilysin biosynthetic gene cluster (100% of genes show similarity)     | -                                                                                   |

Table S1. Continued.

| Strain clusters | Type            | Length (bp) | Most similar known clusters                                           | Predicted core clusters                                                              |
|-----------------|-----------------|-------------|-----------------------------------------------------------------------|--------------------------------------------------------------------------------------|
| <b>T20E-257</b> |                 |             |                                                                       |                                                                                      |
| Cluster 1       | Nrps            | 65410       | Surfactin biosynthetic gene cluster (82% of genes show similarity)    | 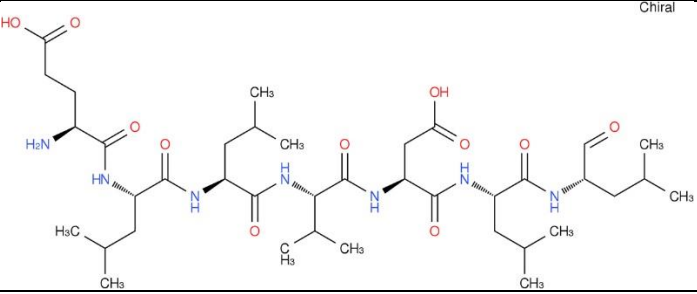  |
| Cluster 2       | Otherks         | 41244       | Butirosin biosynthetic gene cluster (7% of genes show similarity)     | -                                                                                    |
| Cluster 3       | Terpene         | 20740       | -                                                                     | -                                                                                    |
| Cluster 4       | Lantipeptide    | 28889       | -                                                                     | -                                                                                    |
| Cluster 5       | Transatpks      | 85887       | Macrolactin biosynthetic gene cluster (100% of genes show similarity) | -                                                                                    |
| Cluster 6       | Transatpks-Nrps | 102707      | Bacillaene biosynthetic gene cluster (100% of genes show similarity)  |   |
| Cluster 7       | Transatpks-Nrps | 137831      | Fengycin biosynthetic gene cluster (100% of genes show similarity)    |  |
| Cluster 8       | Terpene         | 21883       | -                                                                     | -                                                                                    |
| Cluster 9       | T3pks           | 41100       | -                                                                     | -                                                                                    |

Table S1. Continued.

| Strain clusters | Type             | Length (bp) | Most similar known clusters                                             | Predicted core clusters                                                             |
|-----------------|------------------|-------------|-------------------------------------------------------------------------|-------------------------------------------------------------------------------------|
| <b>T20E-257</b> |                  |             |                                                                         |                                                                                     |
| Cluster 10      | Transatpks       | 100450      | Difficidin biosynthetic gene cluster (100% of genes show similarity)    | 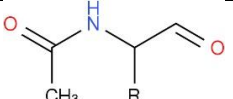 |
| Cluster 11      | Bacteriocin-Nrps | 66793       | Bacillibactin biosynthetic gene cluster (100% of genes show similarity) |  |
| Cluster 12      | Other            | 41418       | Bacilysin biosynthetic gene cluster (100% of genes show similarity)     | -                                                                                   |

Table S1. Continued.

| Strain clusters | Type            | Length (bp) | Most similar known clusters                                           | Predicted core clusters                                                               |
|-----------------|-----------------|-------------|-----------------------------------------------------------------------|---------------------------------------------------------------------------------------|
| <b>157</b>      |                 |             |                                                                       |                                                                                       |
| Cluster 1       | Nrps            | 65407       | Surfactin_biosynthetic_gene_cluster (82% of genes show similarity)    | 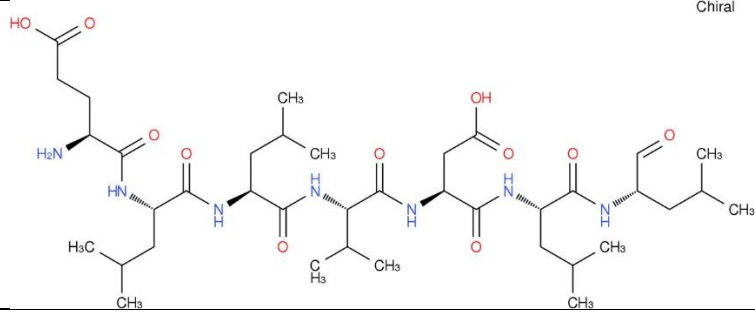   |
| Cluster 2       | Phosphonate     | 40884       | -                                                                     | -                                                                                     |
| Cluster 3       | Otherks         | 41244       | Butirosin biosynthetic gene cluster (7% of genes show similarity)     | -                                                                                     |
| Cluster 4       | Terpene         | 20740       | -                                                                     | -                                                                                     |
| Cluster 5       | Transatpks      | 82191       | Macrolactin biosynthetic gene cluster (100% of genes show similarity) | -                                                                                     |
| Cluster 6       | Transatpks-Nrps | 102683      | Bacillaene biosynthetic gene cluster (100% of genes show similarity)  |   |
| Cluster 7       | Transatpks-Nrps | 137833      | Fengycin biosynthetic gene cluster (100% of genes show similarity)    |  |
| Cluster 8       | Terpene         | 21883       | -                                                                     | -                                                                                     |
| Cluster 9       | T3pks           | 41100       | -                                                                     | -                                                                                     |

Table S1. Continued.

| Strain clusters | Type             | Length (bp) | Most similar known clusters                                             | Predicted core clusters                                                             |
|-----------------|------------------|-------------|-------------------------------------------------------------------------|-------------------------------------------------------------------------------------|
| <b>157</b>      |                  |             |                                                                         |                                                                                     |
| Cluster 10      | Transatpks       | 100444      | Difficidin biosynthetic gene cluster (100% of genes show similarity)    | 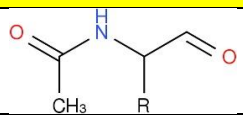 |
| Cluster 11      | Bacteriocin-Nrps | 66795       | Bacillibactin biosynthetic gene cluster (100% of genes show similarity) |  |
| Cluster 12      | Nrps             | 65342       | -                                                                       | -                                                                                   |
| Cluster 13      | Other            | 41418       | Bacilysin biosynthetic gene cluster (100% of genes show similarity)     | -                                                                                   |

Table S1. Continued.

| Strain clusters | Type             | Length (bp) | Most similar known clusters                                             | Predicted core clusters                                                               |
|-----------------|------------------|-------------|-------------------------------------------------------------------------|---------------------------------------------------------------------------------------|
| <b>TB1501</b>   |                  |             |                                                                         |                                                                                       |
| Cluster 1       | Bacteriocin-Nrps | 66794       | Bacillibactin biosynthetic gene cluster (100% of genes show similarity) | 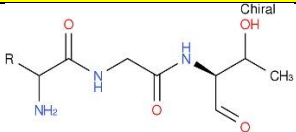   |
| Cluster 2       | Other            | 41418       | Bacilysin biosynthetic gene cluster (100% of genes show similarity)     | -                                                                                     |
| Cluster 3       | Nrps             | 65407       | Surfactin biosynthetic gene cluster (91% of genes show similarity)      |    |
| Cluster 4       | Otherks          | 41244       | Butirosin biosynthetic gene cluster (7% of genes show similarity)       | -                                                                                     |
| Cluster 5       | Terpene          | 20740       | -                                                                       | -                                                                                     |
| Cluster 6       | Transatpks       | 85900       | Macrolactin biosynthetic gene cluster (100% of genes show similarity)   |   |
| Cluster 7       | Transatpks-Nrps  | 102691      | Bacillaene biosynthetic gene cluster (100% of genes show similarity)    |  |
| Cluster 8       | Transatpks-Nrps  | 137820      | Fengycin biosynthetic gene cluster (100% of genes show similarity)      |  |



Table S1. Continued.

| Strain clusters | Type       | Length (bp) | Most similar known clusters                                          | Predicted core clusters                                                             |
|-----------------|------------|-------------|----------------------------------------------------------------------|-------------------------------------------------------------------------------------|
| <b>TB1501</b>   |            |             |                                                                      |                                                                                     |
| Cluster 9       | Terpene    | 21883       | -                                                                    | -                                                                                   |
| Cluster 10      | T3pks      | 41100       | -                                                                    | -                                                                                   |
| Cluster 11      | Transatpks | 100449      | Difficidin biosynthetic gene cluster (100% of genes show similarity) | 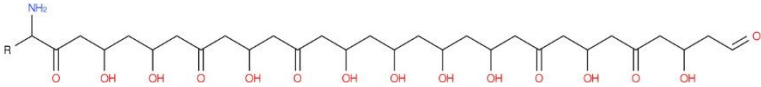 |

Table S1. Continued.

| Strain clusters | Type            | Length (bp) | Most similar known clusters                                           | Predicted core clusters                                                               |
|-----------------|-----------------|-------------|-----------------------------------------------------------------------|---------------------------------------------------------------------------------------|
| <b>NJAU-Z9</b>  |                 |             |                                                                       |                                                                                       |
| Cluster 1       | Transatpks      | 100450      | Difficidin biosynthetic gene cluster (100% of genes show similarity)  | 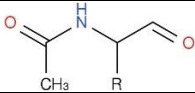   |
| Cluster 2       | T3pks           | 41100       | -                                                                     | -                                                                                     |
| Cluster 3       | Terpene         | 21883       | -                                                                     | -                                                                                     |
| Cluster 4       | Transatpks-Nrps | 137830      | Fengycin biosynthetic gene cluster (100% of genes show similarity)    |    |
| Cluster 5       | Transatpks-Nrps | 102701      | Bacillaene biosynthetic gene cluster (100% of genes show similarity)  |    |
| Cluster 6       | Transatpks      | 85887       | Macrolactin biosynthetic gene cluster (100% of genes show similarity) | -                                                                                     |
| Cluster 7       | Lantipeptide    | 28889       | -                                                                     | -                                                                                     |
| Cluster 8       | Terpene         | 20740       | -                                                                     | -                                                                                     |
| Cluster 9       | Otherks         | 41244       | Butirosin biosynthetic gene cluster (7% of genes show similarity)     | -                                                                                     |
| Cluster 10      | Nrps            | 65407       | Surfactin biosynthetic gene cluster (82% of genes show similarity)    |  |

Table S1. Continued.

| Strain clusters | Type             | Length (bp) | Most similar known clusters                                             | Predicted core clusters                                                             |
|-----------------|------------------|-------------|-------------------------------------------------------------------------|-------------------------------------------------------------------------------------|
| <b>NJAU-Z9</b>  |                  |             |                                                                         |                                                                                     |
| Cluster 11      | Other            | 41418       | Bacilysin biosynthetic gene cluster (100% of genes show similarity)     | -                                                                                   |
| Cluster 12      | Bacteriocin-Nrps | 66838       | Bacillibactin biosynthetic gene cluster (100% of genes show similarity) | 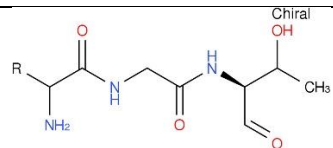 |

Table S1. Continued.

| Strain clusters | Type            | Length (bp) | Most similar known clusters                                           | Predicted core clusters                                                               |
|-----------------|-----------------|-------------|-----------------------------------------------------------------------|---------------------------------------------------------------------------------------|
| <b>SCDB_291</b> |                 |             |                                                                       |                                                                                       |
| Cluster 1       | Terpene         | 21883       | -                                                                     | -                                                                                     |
| Cluster 2       | Transatpks-Nrps | 137836      | Fengycin biosynthetic gene cluster (100% of genes show similarity)    | 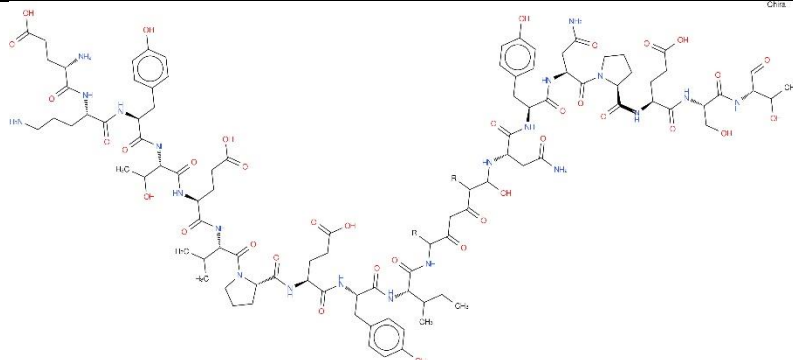   |
| Cluster 3       | Transatpks-Nrps | 102701      | Bacillaene biosynthetic gene cluster (100% of genes show similarity)  |    |
| Cluster 4       | Transatpks      | 85890       | Macrolactin biosynthetic gene cluster (100% of genes show similarity) | -                                                                                     |
| Cluster 5       | Terpene         | 20740       | -                                                                     | -                                                                                     |
| Cluster 6       | Otherks         | 41244       | Butirosin biosynthetic gene cluster (7% of genes show similarity)     | -                                                                                     |
| Cluster 7       | Nrps            | 65407       | Surfactin biosynthetic gene cluster (82% of genes show similarity)    |  |
| Cluster 8       | Lantipeptide    | 22615       | Locillomycin biosynthetic gene cluster (35% of genes show similarity) | -                                                                                     |

Table S1. Continued.

| Strain clusters | Type             | Length (bp) | Most similar known clusters                                             | Predicted core clusters                                                             |
|-----------------|------------------|-------------|-------------------------------------------------------------------------|-------------------------------------------------------------------------------------|
| <b>SCDB_291</b> |                  |             |                                                                         |                                                                                     |
| Cluster 9       | Other            | 41418       | Bacilysin biosynthetic gene cluster (100% of genes show similarity)     | -                                                                                   |
| Cluster 10      | Bacteriocin-Nrps | 66794       | Bacillibactin biosynthetic gene cluster (100% of genes show similarity) | 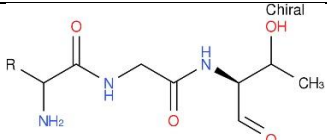 |
| Cluster 11      | Transatpks       | 100411      | Difficidin biosynthetic gene cluster (100% of genes show similarity)    |  |
| Cluster 12      | T3pks            | 41100       | -                                                                       | -                                                                                   |

Table S1. Continued.

| Strain clusters | Type             | Length (bp) | Most similar known clusters                                             | Predicted core clusters                                                               |
|-----------------|------------------|-------------|-------------------------------------------------------------------------|---------------------------------------------------------------------------------------|
| <b>SCGB_1</b>   |                  |             |                                                                         |                                                                                       |
| Cluster 1       | T3pks            | 41100       | -                                                                       | -                                                                                     |
| Cluster 2       | Transatpks       | 100411      | Difficidin biosynthetic gene cluster (100% of genes show similarity)    | 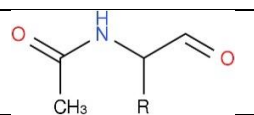   |
| Cluster 3       | Bacteriocin-Nrps | 66794       | Bacillibactin biosynthetic gene cluster (100% of genes show similarity) |    |
| Cluster 4       | Other            | 41418       | Bacilysin biosynthetic gene cluster (100% of genes show similarity)     | -                                                                                     |
| Cluster 5       | Lantipeptide     | 22615       | Locillomycin biosynthetic gene cluster (35% of genes show similarity)   | -                                                                                     |
| Cluster 6       | Nrps             | 65407       | Surfactin biosynthetic gene cluster (82% of genes show similarity)      |   |
| Cluster 7       | Otherks          | 41244       | Butirosin biosynthetic gene cluster (7% of genes show similarity)       | -                                                                                     |
| Cluster 8       | Terpene          | 20740       | -                                                                       | -                                                                                     |
| Cluster 9       | Transatpks       | 85890       | Macrolactin biosynthetic gene cluster (100% of genes show similarity)   | -                                                                                     |
| Cluster 10      | Transatpks-Nrps  | 102701      | Bacillaene biosynthetic gene cluster (100% of genes show similarity)    |  |

Table S1. Continued.

| Strain clusters | Type            | Length (bp) | Most similar known clusters                                        | Predicted core clusters                                                             |
|-----------------|-----------------|-------------|--------------------------------------------------------------------|-------------------------------------------------------------------------------------|
| <b>SCGB_1</b>   |                 |             |                                                                    |                                                                                     |
| Cluster 11      | Transatpks-Nrps | 137846      | Fengycin biosynthetic gene cluster (100% of genes show similarity) | 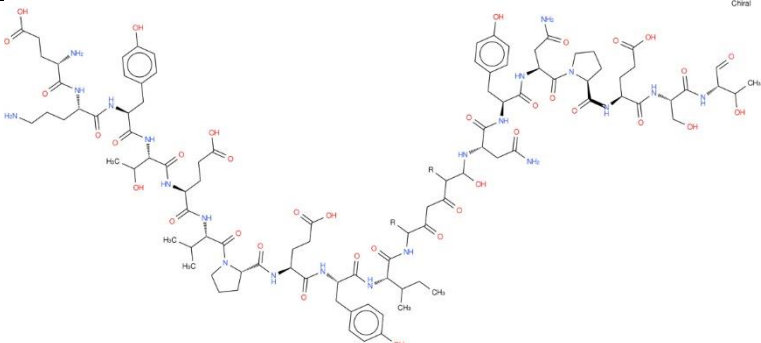 |
| Cluster 12      | Terpene         | 21883       | -                                                                  | -                                                                                   |

Table S1. Continued.

| Strain clusters | Type            | Length (bp) | Most similar known clusters                                           | Predicted core clusters                                                               |
|-----------------|-----------------|-------------|-----------------------------------------------------------------------|---------------------------------------------------------------------------------------|
| <b>LABIM40</b>  |                 |             |                                                                       |                                                                                       |
| Cluster 1       | Thiopeptide     | 26798       | -                                                                     | -                                                                                     |
| Cluster 2       | Nrps            | 65407       | Surfactin biosynthetic gene cluster (82% of genes show similarity)    | 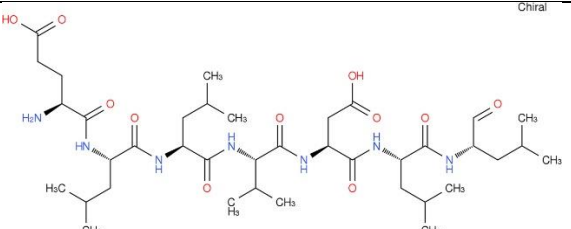   |
| Cluster 3       | Otherks         | 41244       | Butirosin biosynthetic gene cluster (7% of genes show similarity)     | -                                                                                     |
| Cluster 4       | Terpene         | 20740       | -                                                                     | -                                                                                     |
| Cluster 5       | Transatpks      | 85908       | Macrolactin biosynthetic gene cluster (100% of genes show similarity) | -                                                                                     |
| Cluster 6       | Transatpks-Nrps | 102695      | Bacillaene biosynthetic gene cluster (100% of genes show similarity)  |    |
| Cluster 7       | Transatpks-Nrps | 137654      | Fengycin biosynthetic gene cluster (100% of genes show similarity)    |   |
| Cluster 8       | Terpene         | 21883       | -                                                                     | -                                                                                     |
| Cluster 9       | T3pks           | 41100       | -                                                                     | -                                                                                     |
| Cluster 10      | Transatpks      | 100450      | Difficidin biosynthetic gene cluster (100% of genes show similarity)  |  |



Table S1. Continued.

| Strain clusters | Type             | Length (bp) | Most similar known clusters                                             | Predicted core clusters                                                             |
|-----------------|------------------|-------------|-------------------------------------------------------------------------|-------------------------------------------------------------------------------------|
| <b>LABIM40</b>  |                  |             |                                                                         |                                                                                     |
| Cluster 11      | Bacteriocin-Nrps | 66791       | Bacillibactin biosynthetic gene cluster (100% of genes show similarity) | 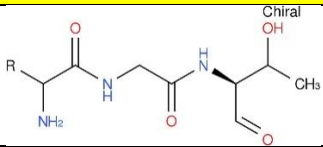 |
| Cluster 12      | Other            | 41418       | Bacilysin biosynthetic gene cluster (100% of genes show similarity)     | -                                                                                   |

Table S1. Continued.

| Strain clusters | Type             | Length (bp) | Most similar known clusters                                             | Predicted core clusters                                                               |
|-----------------|------------------|-------------|-------------------------------------------------------------------------|---------------------------------------------------------------------------------------|
| <b>L-1</b>      |                  |             |                                                                         |                                                                                       |
| Cluster 1       | Bacteriocin-Nrps | 66793       | Bacillibactin biosynthetic gene cluster (100% of genes show similarity) | 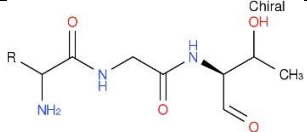   |
| Cluster 2       | Other            | 41418       | Bacilysin biosynthetic gene cluster (100% of genes show similarity)     | -                                                                                     |
| Cluster 3       | Nrps             | 65407       | Surfactin biosynthetic gene cluster (91% of genes show similarity)      |    |
| Cluster 4       | Otherks          | 41244       | Butirosin biosynthetic gene cluster (7% of genes show similarity)       | -                                                                                     |
| Cluster 5       | Terpene          | 20740       | -                                                                       | -                                                                                     |
| Cluster 6       | Transatpkps      | 85905       | Macrolactin biosynthetic gene cluster (100% of genes show similarity)   |    |
| Cluster 7       | Transatpkps-Nrps | 102689      | Bacillaene biosynthetic gene cluster (100% of genes show similarity)    |   |
| Cluster 8       | Transatpkps-Nrps | 137823      | Fengycin biosynthetic gene cluster (100% of genes show similarity)      |  |

Table S1. Continued.

| Strain clusters | Type       | Length (bp) | Most similar known clusters                                          | Predicted core clusters                                                             |
|-----------------|------------|-------------|----------------------------------------------------------------------|-------------------------------------------------------------------------------------|
| <b>L-1</b>      |            |             |                                                                      |                                                                                     |
| Cluster 9       | Terpene    | 21883       | -                                                                    | -                                                                                   |
| Cluster 10      | T3pks      | 41100       | -                                                                    | -                                                                                   |
| Cluster 11      | Transatpks | 100449      | Difficidin biosynthetic gene cluster (100% of genes show similarity) | 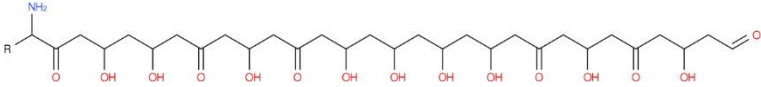 |

Table S1. Continued.

| Strain clusters | Type             | Length (bp) | Most similar known clusters                                             | Predicted core clusters                                                               |
|-----------------|------------------|-------------|-------------------------------------------------------------------------|---------------------------------------------------------------------------------------|
| <b>SCGB_574</b> |                  |             |                                                                         |                                                                                       |
| Cluster 1       | T3pks            | 41100       | -                                                                       | -                                                                                     |
| Cluster 2       | Transatpks       | 100444      | Difficidin biosynthetic gene cluster (100% of genes show similarity)    | 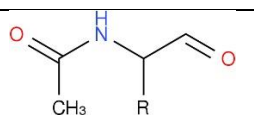   |
| Cluster 3       | Bacteriocin-Nrps | 66795       | Bacillibactin biosynthetic gene cluster (100% of genes show similarity) |    |
| Cluster 4       | Nrps             | 68420       | -                                                                       | -                                                                                     |
| Cluster 5       | Other            | 41418       | Bacilysin biosynthetic gene cluster (100% of genes show similarity)     | -                                                                                     |
| Cluster 6       | Nrps             | 65407       | Surfactin biosynthetic gene cluster (82% of genes show similarity)      |   |
| Cluster 7       | Phosphonate      | 40884       | -                                                                       | -                                                                                     |
| Cluster 8       | Otherks          | 41244       | Butirosin biosynthetic gene cluster (7% of genes show similarity)       | -                                                                                     |
| Cluster 9       | Terpene          | 20740       | -                                                                       | -                                                                                     |
| Cluster 10      | Transatpks       | 89899       | Macrolactin biosynthetic gene cluster (100% of genes show similarity)   | -                                                                                     |
| Cluster 11      | Transatpks-Nrps  | 102683      | Bacillaene biosynthetic gene cluster (100% of genes show similarity)    |  |

Table S1. Continued.

| Strain clusters | Type            | Length (bp) | Most similar known clusters                                        | Predicted core clusters                                                             |
|-----------------|-----------------|-------------|--------------------------------------------------------------------|-------------------------------------------------------------------------------------|
| <b>SCGB_574</b> |                 |             |                                                                    |                                                                                     |
| Cluster 12      | Transatpks-Nrps | 137830      | Fengycin biosynthetic gene cluster (100% of genes show similarity) | 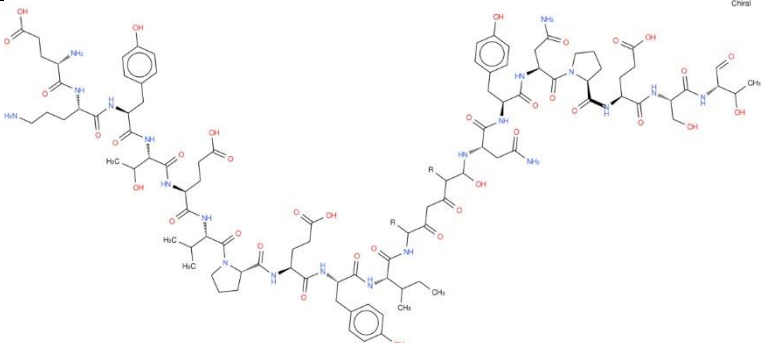 |
| Cluster 13      | Terpene         | 21883       | -                                                                  | -                                                                                   |

Table S1. Continued.

| Strain clusters | Type            | Length (bp) | Most similar known clusters                                           | Predicted core clusters                                                               |
|-----------------|-----------------|-------------|-----------------------------------------------------------------------|---------------------------------------------------------------------------------------|
| <b>OSY-S3</b>   |                 |             |                                                                       |                                                                                       |
| Cluster 1       | Nrps            | 61941       | Surfactin biosynthetic gene cluster (91% of genes show similarity)    | 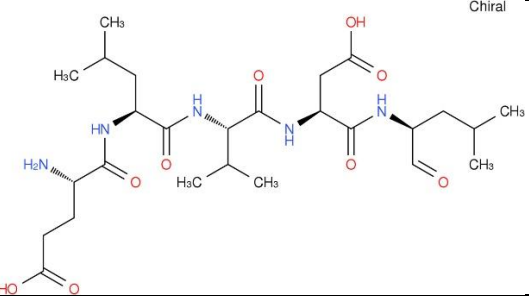   |
| Cluster 2       | Terpene         | 20740       | -                                                                     | -                                                                                     |
| Cluster 3       | Transatpks      | 80746       | Macrolactin biosynthetic gene cluster (100% of genes show similarity) | -                                                                                     |
| Cluster 4       | Transatpks-Nrps | 102364      | Bacillaene biosynthetic gene cluster (100% of genes show similarity)  |    |
| Cluster 5       | Nrps            | 131633      | Fengycin biosynthetic gene cluster (100% of genes show similarity)    |   |
| Cluster 6       | Terpene         | 20746       | -                                                                     | -                                                                                     |
| Cluster 7       | T3pks           | 41100       | -                                                                     | -                                                                                     |
| Cluster 8       | Transatpks      | 93770       | Difficidin biosynthetic gene cluster (100% of genes show similarity)  |  |

Table S1. Continued.

| Strain clusters | Type             | Length (bp) | Most similar known clusters                                             | Predicted core clusters                                                                                                                                                                                                                                                                                                                                                                              |
|-----------------|------------------|-------------|-------------------------------------------------------------------------|------------------------------------------------------------------------------------------------------------------------------------------------------------------------------------------------------------------------------------------------------------------------------------------------------------------------------------------------------------------------------------------------------|
| <b>OSY-S3</b>   |                  |             |                                                                         |                                                                                                                                                                                                                                                                                                                                                                                                      |
| Cluster 9       | Nrps             | 47309       | -                                                                       | -                                                                                                                                                                                                                                                                                                                                                                                                    |
| Cluster 10      | Bacteriocin-Nrps | 66779       | Bacillibactin biosynthetic gene cluster (100% of genes show similarity) | 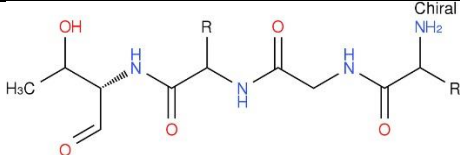 <p>Chemical structure of Bacillibactin biosynthetic gene cluster product. The structure shows a complex molecule with multiple amide bonds, a hydroxyl group (OH), a methyl group (H<sub>3</sub>C), and a chiral center (Chiral NH<sub>2</sub>). The molecule is a cyclic peptide with a complex side chain.</p> |
| Cluster 11      | Other            | 41418       | Bacilysin biosynthetic gene cluster (100% of genes show similarity)     | -                                                                                                                                                                                                                                                                                                                                                                                                    |
| Cluster 12      | Nrps             | 34459       | Bacitracin biosynthetic gene cluster (33% of genes show similarity)     |  <p>Chemical structure of Bacitracin biosynthetic gene cluster product. The structure shows a complex molecule with multiple amide bonds, a hydroxyl group (OH), a methyl group (H<sub>3</sub>C), and a chiral center (Chiral NH<sub>2</sub>). The molecule is a cyclic peptide with a complex side chain.</p>    |

Table S1. Continued.

| Strain clusters | Type            | Length (bp) | Most similar known clusters                                           | Predicted core clusters                                                                           |
|-----------------|-----------------|-------------|-----------------------------------------------------------------------|---------------------------------------------------------------------------------------------------|
| <b>TJ02</b>     |                 |             |                                                                       |                                                                                                   |
| Cluster 1       | Nrps            | 65407       | Surfactin biosynthetic gene cluster (91% of genes show similarity)    | 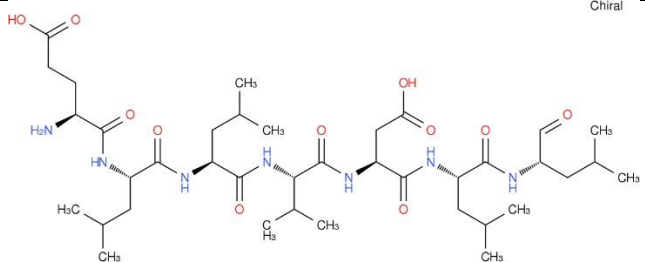 <p>Chiral</p> |
| Cluster 2       | Otherks         | 41244       | Butirosin biosynthetic gene cluster (7% of genes show similarity)     | -                                                                                                 |
| Cluster 3       | Terpene         | 20740       | -                                                                     | -                                                                                                 |
| Cluster 4       | Transatpks      | 85905       | Macrolactin biosynthetic gene cluster (100% of genes show similarity) | -                                                                                                 |
| Cluster 5       | Transatpks-Nrps | 102695      | Bacillaene biosynthetic gene cluster (100% of genes show similarity)  |                |
| Cluster 6       | Transatpks-Nrps | 137823      | Fengycin biosynthetic gene cluster (100% of genes show similarity)    |               |
| Cluster 7       | Terpene         | 21883       | -                                                                     | -                                                                                                 |
| Cluster 8       | T3pks           | 41100       | -                                                                     | -                                                                                                 |
| Cluster 9       | Transatpks      | 100449      | Difficidin biosynthetic gene cluster (100% of genes show similarity)  |              |



Table S1. Continued.

| Strain clusters | Type             | Length (bp) | Most similar known clusters                                             | Predicted core clusters                                                             |
|-----------------|------------------|-------------|-------------------------------------------------------------------------|-------------------------------------------------------------------------------------|
| <b>TJ02</b>     |                  |             |                                                                         |                                                                                     |
| Cluster 10      | Bacteriocin-Nrps | 66791       | Bacillibactin biosynthetic gene cluster (100% of genes show similarity) | 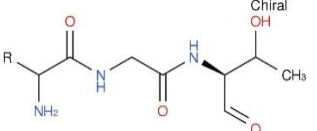 |
| Cluster 11      | Other            | 41418       | Bacilysin biosynthetic gene cluster (100% of genes show similarity)     | -                                                                                   |

Table S1. Continued.

| Strain clusters | Type             | Length (bp) | Most similar known clusters                                             | Predicted core clusters                                                               |
|-----------------|------------------|-------------|-------------------------------------------------------------------------|---------------------------------------------------------------------------------------|
| <b>C2</b>       |                  |             |                                                                         |                                                                                       |
| Cluster 1       | Otherks          | 41244       | Butirosin biosynthetic gene cluster (7% of genes show similarity)       | -                                                                                     |
| Cluster 2       | Terpene          | 20740       | -                                                                       | -                                                                                     |
| Cluster 3       | Transatpks       | 85902       | Macrolactin biosynthetic gene cluster (100% of genes show similarity)   | 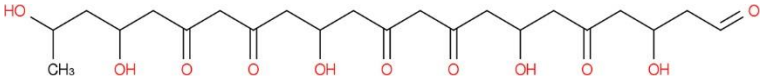   |
| Cluster 4       | Transatpks-Nrps  | 102692      | Bacillaene biosynthetic gene cluster (100% of genes show similarity)    |    |
| Cluster 5       | Transatpks-Nrps  | 137833      | Fengycin biosynthetic gene cluster (100% of genes show similarity)      |    |
| Cluster 6       | Terpene          | 21883       | -                                                                       | -                                                                                     |
| Cluster 7       | T3pks            | 41100       | -                                                                       | -                                                                                     |
| Cluster 8       | Transatpks       | 100477      | Difficidin biosynthetic gene cluster (100% of genes show similarity)    |  |
| Cluster 9       | Other            | 41418       | Bacilysin biosynthetic gene cluster (100% of genes show similarity)     | -                                                                                     |
| Cluster 10      | Nrps             | 40483       | -                                                                       | -                                                                                     |
| Cluster 11      | Bacteriocin-Nrps | 66795       | Bacillibactin biosynthetic gene cluster (100% of genes show similarity) |  |

Table S1. Continued.

| Strain clusters | Type        | Length (bp) | Most similar known clusters                                        | Predicted core clusters                                                             |
|-----------------|-------------|-------------|--------------------------------------------------------------------|-------------------------------------------------------------------------------------|
| <b>C2</b>       |             |             |                                                                    |                                                                                     |
| Cluster 12      | Nrps        | 23634       | -                                                                  | -                                                                                   |
| Cluster 13      | Nrps        | 65407       | Surfactin biosynthetic gene cluster (82% of genes show similarity) | 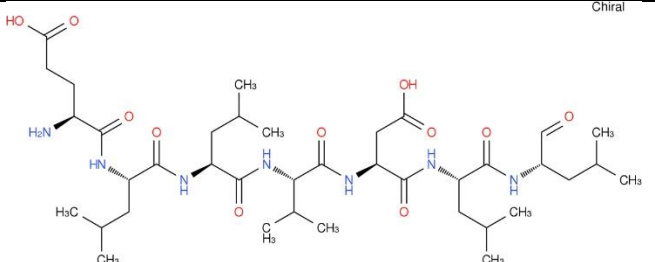 |
| Cluster 14      | Phosphonate | 40884       | -                                                                  | -                                                                                   |
| Cluster 15      | Nrps        | 1853        | -                                                                  | -                                                                                   |
| Cluster 16      | Nrps        | 1477        | -                                                                  | -                                                                                   |

Table S1. Continued.

| Strain clusters | Type             | Length (bp) | Most similar known clusters                                             | Predicted core clusters                                                               |
|-----------------|------------------|-------------|-------------------------------------------------------------------------|---------------------------------------------------------------------------------------|
| <b>3A-25B</b>   |                  |             |                                                                         |                                                                                       |
| Cluster 1       | Transatpks       | 85910       | Macrolactin biosynthetic gene cluster (100% of genes show similarity)   | 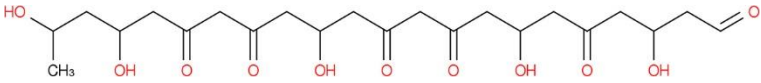   |
| Cluster 2       | Transatpks-Nrps  | 102677      | Bacillaene biosynthetic gene cluster (100% of genes show similarity)    |    |
| Cluster 3       | Transatpks-Nrps  | 87670       | Fengycin biosynthetic gene cluster (80% of genes show similarity)       |    |
| Cluster 4       | Nrps             | 24279       | -                                                                       | -                                                                                     |
| Cluster 5       | Other            | 41418       | Bacilysin biosynthetic gene cluster (100% of genes show similarity)     | -                                                                                     |
| Cluster 6       | Bacteriocin-Nrps | 73515       | Bacillibactin biosynthetic gene cluster (100% of genes show similarity) |  |
| Cluster 7       | Nrps             | 22502       | Plipastatin biosynthetic gene cluster (30% of genes show similarity)    | -                                                                                     |
| Cluster 8       | Terpene          | 21883       | -                                                                       | -                                                                                     |
| Cluster 9       | T3pks            | 41100       | -                                                                       | -                                                                                     |
| Cluster 10      | Transatpks       | 45657       | Difficidin biosynthetic gene cluster (53% of genes show similarity)     |  |

Table S1. Continued.

| Strain clusters | Type        | Length (bp) | Most similar known clusters                                         | Predicted core clusters                                                               |
|-----------------|-------------|-------------|---------------------------------------------------------------------|---------------------------------------------------------------------------------------|
| <b>3A-25B</b>   |             |             |                                                                     |                                                                                       |
| Cluster 11      | Terpene     | 20740       | -                                                                   | -                                                                                     |
| Cluster 12      | Otherks     | 41244       | Butirosin biosynthetic gene cluster (7% of genes show similarity)   | -                                                                                     |
| Cluster 13      | Transatpks  | 29069       | Difficidin biosynthetic gene cluster (40% of genes show similarity) | 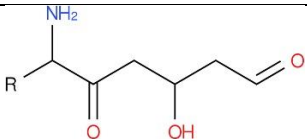   |
| Cluster 14      | Phosphonate | 40884       | -                                                                   | -                                                                                     |
| Cluster 15      | Nrps        | 27800       | Surfactin biosynthetic gene cluster (47% of genes show similarity)  |    |
| Cluster 16      | Nrps        | 25589       | Surfactin biosynthetic gene cluster (39% of genes show similarity)  | -                                                                                     |
| Cluster 17      | Transatpks  | 23620       | Difficidin biosynthetic gene cluster (26% of genes show similarity) |    |
| Cluster 18      | Nrps        | 13266       | Fengycin biosynthetic gene cluster (20% of genes show similarity)   |   |
| Cluster 19      | Nrps        | 9516        | Surfactin biosynthetic gene cluster (8% of genes show similarity)   |  |

Table S1. Continued.

| Strain clusters | Type | Length (bp) | Most similar known clusters                                       | Predicted core clusters                                                             |
|-----------------|------|-------------|-------------------------------------------------------------------|-------------------------------------------------------------------------------------|
| <b>3A-25B</b>   |      |             |                                                                   |                                                                                     |
| Cluster 20      | Nrps | 9270        | Fengycin biosynthetic gene cluster (13% of genes show similarity) | 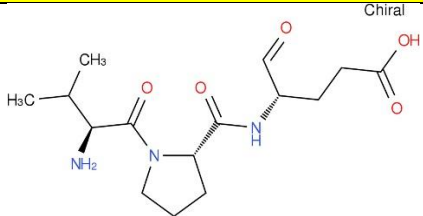 |
| Cluster 21      | Nrps | 7952        | -                                                                 | -                                                                                   |
| Cluster 22      | Nrps | 6394        | -                                                                 | -                                                                                   |

Table S1. Continued.

| Strain clusters | Type             | Length (bp) | Most similar known clusters                                             | Predicted core clusters                                                               |
|-----------------|------------------|-------------|-------------------------------------------------------------------------|---------------------------------------------------------------------------------------|
| <b>7551-2</b>   |                  |             |                                                                         |                                                                                       |
| Cluster 1       | Otherks          | 41244       | Butirosin biosynthetic gene cluster (7% of genes show similarity)       | -                                                                                     |
| Cluster 2       | Terpene          | 20740       | -                                                                       | -                                                                                     |
| Cluster 3       | Transatpks       | 85887       | Macrolactin biosynthetic gene cluster (100% of genes show similarity)   | 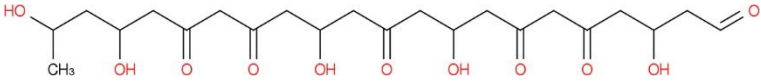   |
| Cluster 4       | Transatpks-Nrps  | 102704      | Bacillaene biosynthetic gene cluster (100% of genes show similarity)    |    |
| Cluster 5       | Transatpks-Nrps  | 87556       | Fengycin biosynthetic gene cluster (80% of genes show similarity)       |    |
| Cluster 6       | Other            | 41418       | Bacilysin biosynthetic gene cluster (100% of genes show similarity)     | -                                                                                     |
| Cluster 7       | Bacteriocin-Nrps | 66792       | Bacillibactin biosynthetic gene cluster (100% of genes show similarity) |  |
| Cluster 8       | Transatpks       | 28182       | Difficidin biosynthetic gene cluster (46% of genes show similarity)     |  |
| Cluster 9       | Nrps             | 21920       | Plipastatin biosynthetic gene cluster (30% of genes show similarity)    | -                                                                                     |

Table S1. Continued.

| Strain clusters | Type       | Length (bp) | Most similar known clusters                                         | Predicted core clusters                                                               |
|-----------------|------------|-------------|---------------------------------------------------------------------|---------------------------------------------------------------------------------------|
| <b>7551-2</b>   |            |             |                                                                     |                                                                                       |
| Cluster 10      | Terpene    | 21883       | -                                                                   | -                                                                                     |
| Cluster 11      | T3pks      | 41100       | -                                                                   | -                                                                                     |
| Cluster 12      | Transatpks | 45970       | Difficidin biosynthetic gene cluster (53% of genes show similarity) | 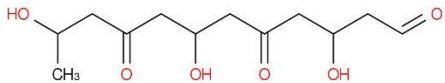   |
| Cluster 13      | Nrps       | 25182       | Surfactin biosynthetic gene cluster (39% of genes show similarity)  | -                                                                                     |
| Cluster 14      | Nrps       | 27661       | Surfactin biosynthetic gene cluster (47% of genes show similarity)  |    |
| Cluster 15      | Transatpks | 22804       | Difficidin biosynthetic gene cluster (26% of genes show similarity) |    |
| Cluster 16      | Nrps       | 13190       | Fengycin biosynthetic gene cluster (20% of genes show similarity)   |   |
| Cluster 17      | Nrps       | 1676        | -                                                                   | -                                                                                     |
| Cluster 18      | Nrps       | 9040        | Fengycin biosynthetic gene cluster (13% of genes show similarity)   |  |
| Cluster 19      | Nrps       | 8970        | Surfactin biosynthetic gene cluster (8% of genes show similarity)   |  |



Table S1. Continued.

| Strain clusters | Type  | Length (bp) | Most similar known clusters | Predicted core clusters |
|-----------------|-------|-------------|-----------------------------|-------------------------|
| <b>7551-2</b>   |       |             |                             |                         |
| Cluster 20      | Other | 1795        | -                           | -                       |

Table S1. Continued.

| Strain clusters   | Type            | Length (bp) | Most similar known clusters                                           | Predicted core clusters                                                              |
|-------------------|-----------------|-------------|-----------------------------------------------------------------------|--------------------------------------------------------------------------------------|
| <b>SRCM101413</b> |                 |             |                                                                       |                                                                                      |
| Cluster 1         | Nrps            | 65407       | Surfactin biosynthetic gene cluster (82% of genes show similarity)    | 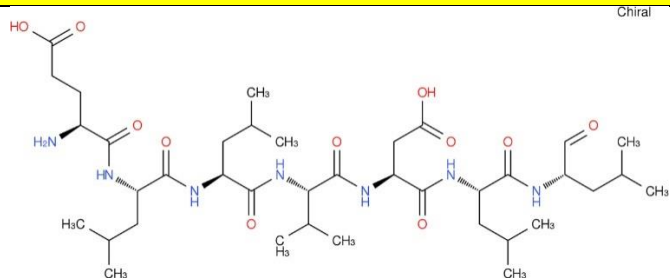  |
| Cluster 2         | Ladderane       | 41121       | -                                                                     | -                                                                                    |
| Cluster 3         | Otherks         | 41244       | Butirosin biosynthetic gene cluster (7% of genes show similarity)     | -                                                                                    |
| Cluster 4         | Terpene         | 20740       | -                                                                     | -                                                                                    |
| Cluster 5         | Transatpks      | 84066       | Macrolactin biosynthetic gene cluster (100% of genes show similarity) |   |
| Cluster 6         | Transatpks-Nrps | 82334       | Bacillaene biosynthetic gene cluster (100% of genes show similarity)  |  |
| Cluster 7         | Transatpks-Nrps | 135064      | Fengycin biosynthetic gene cluster (93% of genes show similarity)     |  |
| Cluster 8         | Terpene         | 21883       | -                                                                     | -                                                                                    |

Table S1. Continued.

| Strain clusters   | Type             | Length (bp) | Most similar known clusters                                             | Predicted core clusters                                                             |
|-------------------|------------------|-------------|-------------------------------------------------------------------------|-------------------------------------------------------------------------------------|
| <b>SRCM101413</b> |                  |             |                                                                         |                                                                                     |
| Cluster 9         | Transatpks       | 93068       | Difficidin biosynthetic gene cluster (100% of genes show similarity)    | 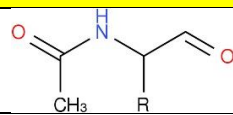 |
| Cluster 10        | Bacteriocin-Nrps | 66784       | Bacillibactin biosynthetic gene cluster (100% of genes show similarity) |  |
| Cluster 11        | Other            | 41418       | Bacilysin biosynthetic gene cluster (100% of genes show similarity)     | -                                                                                   |

Table S1. Continued.

| Strain clusters | Type                        | Length (bp) | Most similar known clusters                                                                   | Predicted core clusters                                                               |
|-----------------|-----------------------------|-------------|-----------------------------------------------------------------------------------------------|---------------------------------------------------------------------------------------|
| <b>GF610</b>    |                             |             |                                                                                               |                                                                                       |
| Cluster 1       | Nrps                        | 10013       | Fengycin biosynthetic gene cluster (20% of genes show similarity)                             | 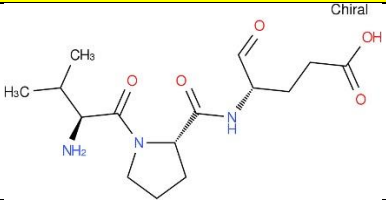   |
| Cluster 2       | Bacteriocin-Transatpks-Nrps | 101372      | Fengycin biosynthetic gene cluster (80% of genes show similarity)                             |    |
| Cluster 3       | Transatpks-Nrps             | 92444       | Bacillaene biosynthetic gene cluster (100% of genes show similarity)                          |    |
| Cluster 4       | Terpene                     | 20740       | -                                                                                             | -                                                                                     |
| Cluster 5       | Otherks                     | 34430       | Butirosin biosynthetic gene cluster (7% of genes show similarity)                             | -                                                                                     |
| Cluster 6       | Lantipeptide                | 27137       | Haloduracin_alpha / haloduracin beta biosynthetic gene cluster (40% of genes show similarity) | -                                                                                     |
| Cluster 7       | Nrps                        | 26295       | Surfactin biosynthetic gene cluster (47% of genes show similarity)                            | -                                                                                     |
| Cluster 8       | Nrps                        | 39238       | Surfactin biosynthetic gene cluster (52% of genes show similarity)                            |  |

Table S1. Continued.

| Strain clusters | Type             | Length (bp) | Most similar known clusters                                            | Predicted core clusters                                                                                                                                                                                                                                                                                                                      |
|-----------------|------------------|-------------|------------------------------------------------------------------------|----------------------------------------------------------------------------------------------------------------------------------------------------------------------------------------------------------------------------------------------------------------------------------------------------------------------------------------------|
| <b>GF610</b>    |                  |             |                                                                        |                                                                                                                                                                                                                                                                                                                                              |
| Cluster 9       | Transatpks-Nrps  | 77736       | Rhizoctin biosynthetic gene cluster (22% of genes show similarity)     | 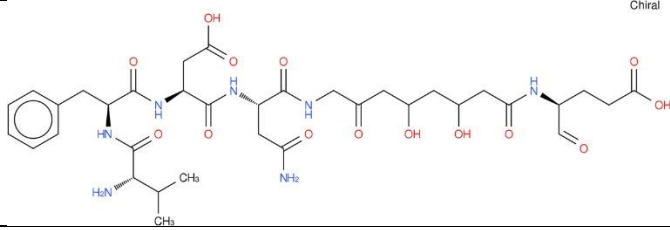 <p>Chemical structure of Rhizoctin biosynthetic gene cluster product. The molecule is a complex polyketide chain with multiple amide bonds, hydroxyl groups, and a terminal carboxylic acid group. It features a chiral center labeled 'Chiral'.</p>     |
| Cluster 10      | Other            | 29708       | Bacilysin biosynthetic gene cluster (100% of genes show similarity)    | -                                                                                                                                                                                                                                                                                                                                            |
| Cluster 11      | Bacteriocin-Nrps | 47170       | Bacillibactin biosynthetic gene cluster (84% of genes show similarity) |  <p>Chemical structure of Bacillibactin biosynthetic gene cluster product. The molecule is a complex polyketide chain with multiple amide bonds, hydroxyl groups, and a terminal carboxylic acid group. It features a chiral center labeled 'Chiral'.</p> |
| Cluster 12      | Transatpks       | 86482       | Difficidin biosynthetic gene cluster (100% of genes show similarity)   |  <p>Chemical structure of Difficidin biosynthetic gene cluster product. The molecule is a complex polyketide chain with multiple amide bonds, hydroxyl groups, and a terminal carboxylic acid group. It features a chiral center labeled 'Chiral'.</p>    |
| Cluster 13      | Transatpks       | 85899       | Macrolactin biosynthetic gene cluster (100% of genes show similarity)  |  <p>Chemical structure of Macrolactin biosynthetic gene cluster product. The molecule is a complex polyketide chain with multiple amide bonds, hydroxyl groups, and a terminal carboxylic acid group. It features a chiral center labeled 'Chiral'.</p>   |
| Cluster 14      | T3pks            | 41100       | -                                                                      | -                                                                                                                                                                                                                                                                                                                                            |
| Cluster 15      | Terpene          | 21883       | -                                                                      | -                                                                                                                                                                                                                                                                                                                                            |
| Cluster 16      | Nrps             | 3179        | -                                                                      | -                                                                                                                                                                                                                                                                                                                                            |
| Cluster 17      | Nrps             | 14428       | Fengycin biosynthetic gene cluster (26% of genes show similarity)      |  <p>Chemical structure of Fengycin biosynthetic gene cluster product. The molecule is a complex polyketide chain with multiple amide bonds, hydroxyl groups, and a terminal carboxylic acid group. It features a chiral center labeled 'Chiral'.</p>    |

Table S1. Continued.

| Strain clusters   | Type            | Length (bp) | Most similar known clusters                                           | Predicted core clusters                                                               |
|-------------------|-----------------|-------------|-----------------------------------------------------------------------|---------------------------------------------------------------------------------------|
| <b>SRCM100072</b> |                 |             |                                                                       |                                                                                       |
| Cluster 1         | Nrps            | 65407       | Surfactin biosynthetic gene cluster (82% of genes show similarity)    | 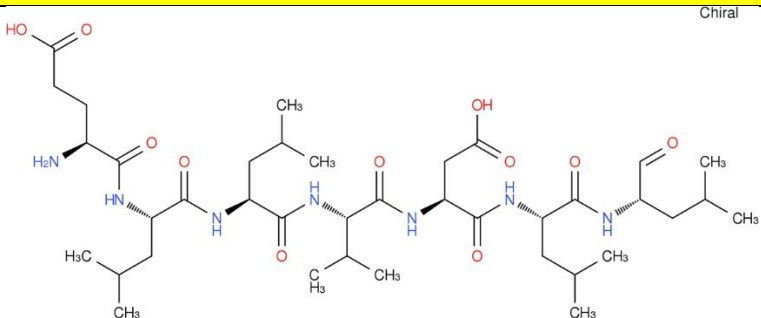   |
| Cluster 2         | Otherks         | 41220       | Butirosin biosynthetic gene cluster (7% of genes show similarity)     | -                                                                                     |
| Cluster 3         | Terpene         | 20515       | -                                                                     | -                                                                                     |
| Cluster 4         | Transatpks-Nrps | 113322      | Bacillaene biosynthetic gene cluster (57% of genes show similarity)   |   |
| Cluster 5         | Lantipeptide    | 28888       | -                                                                     | -                                                                                     |
| Cluster 6         | Transatpks      | 79667       | Macrolactin biosynthetic gene cluster (100% of genes show similarity) | -                                                                                     |
| Cluster 7         | Transatpks-Nrps | 47671       | Bacillaene biosynthetic gene cluster (78% of genes show similarity)   |  |

Table S1. Continued.

| Strain clusters   | Type             | Length (bp) | Most similar known clusters                                             | Predicted core clusters                                                             |
|-------------------|------------------|-------------|-------------------------------------------------------------------------|-------------------------------------------------------------------------------------|
| <b>SRCM100072</b> |                  |             |                                                                         |                                                                                     |
| Cluster 8         | Transatpks-Nrps  | 122425      | Fengycin biosynthetic gene cluster (93% of genes show similarity)       | 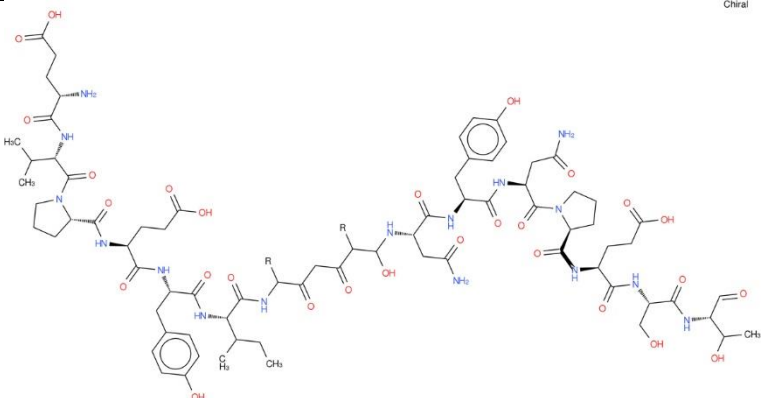 |
| Cluster 9         | Terpene          | 21628       | -                                                                       | -                                                                                   |
| Cluster 10        | Transatpks       | 99600       | Difficidin biosynthetic gene cluster (100% of genes show similarity)    |  |
| Cluster 11        | Bacteriocin-Nrps | 66791       | Bacillibactin biosynthetic gene cluster (100% of genes show similarity) |  |
| Cluster 12        | Other            | 41418       | Bacilysin biosynthetic gene cluster (100% of genes show similarity)     | -                                                                                   |
| Cluster 13        | Bacteriocin      | 13078       | -                                                                       | -                                                                                   |

Table S1. Continued.

| Strain clusters | Type             | Length (bp) | Most similar known clusters                                             | Predicted core clusters                                                               |
|-----------------|------------------|-------------|-------------------------------------------------------------------------|---------------------------------------------------------------------------------------|
| <b>7899</b>     |                  |             |                                                                         |                                                                                       |
| Cluster 1       | Transatpks       | 85893       | Macrolactin biosynthetic gene cluster (100% of genes show similarity)   | 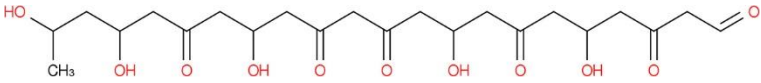   |
| Cluster 2       | Transatpks-Nrps  | 102689      | Bacillaene biosynthetic gene cluster (100% of genes show similarity)    |    |
| Cluster 3       | Transatpks-Nrps  | 86777       | Fengycin biosynthetic gene cluster (73% of genes show similarity)       |    |
| Cluster 4       | Transatpks       | 28420       | Difficidin biosynthetic gene cluster (46% of genes show similarity)     |    |
| Cluster 5       | Bacteriocin-Nrps | 66791       | Bacillibactin biosynthetic gene cluster (100% of genes show similarity) |   |
| Cluster 6       | Nrps             | 24273       | -                                                                       | -                                                                                     |
| Cluster 7       | Other            | 41445       | Bacilysin biosynthetic gene cluster (100% of genes show similarity)     | -                                                                                     |
| Cluster 8       | Terpene          | 21883       | -                                                                       | -                                                                                     |
| Cluster 9       | T3pks            | 41100       | -                                                                       | -                                                                                     |
| Cluster 10      | Transatpks       | 46038       | Difficidin biosynthetic gene cluster (53% of genes show similarity)     |  |



Table S1. Continued.

| Strain clusters | Type            | Length (bp) | Most similar known clusters                                           | Predicted core clusters                                                                                                                                                                                                                                                                                     |
|-----------------|-----------------|-------------|-----------------------------------------------------------------------|-------------------------------------------------------------------------------------------------------------------------------------------------------------------------------------------------------------------------------------------------------------------------------------------------------------|
| <b>7899</b>     |                 |             |                                                                       |                                                                                                                                                                                                                                                                                                             |
| Cluster 11      | Otherks         | 24865       | -                                                                     | -                                                                                                                                                                                                                                                                                                           |
| Cluster 12      | Terpene         | 20740       | -                                                                     | -                                                                                                                                                                                                                                                                                                           |
| Cluster 13      | Nrps            | 25231       | Surfactin biosynthetic gene cluster (47% of genes show similarity)    | -                                                                                                                                                                                                                                                                                                           |
| Cluster 14      | Transatpks-Nrps | 46594       | Rhizocticin biosynthetic gene cluster (6% of genes show similarity)   | 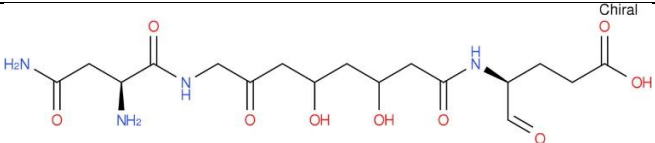 <p>Chemical structure of Rhizocticin biosynthetic gene cluster product. It is a long-chain molecule with multiple amide bonds, hydroxyl groups, and a terminal carboxylic acid group. A chiral center is indicated.</p> |
| Cluster 15      | Nrps            | 23168       | -                                                                     | -                                                                                                                                                                                                                                                                                                           |
| Cluster 16      | Other           | 22390       | Rhizocticin biosynthetic gene cluster (16% of genes show similarity)  | -                                                                                                                                                                                                                                                                                                           |
| Cluster 17      | Nrps            | 27661       | Surfactin biosynthetic gene cluster (47% of genes show similarity)    |  <p>Chemical structure of Surfactin biosynthetic gene cluster product. It is a long-chain molecule with multiple amide bonds, hydroxyl groups, and a terminal carboxylic acid group. A chiral center is indicated.</p>   |
| Cluster 18      | Transatpks      | 23349       | Difficidin biosynthetic gene cluster (26% of genes show similarity)   |  <p>Chemical structure of Difficidin biosynthetic gene cluster product. It is a long-chain molecule with multiple amide bonds, hydroxyl groups, and a terminal carboxylic acid group. A chiral center is indicated.</p> |
| Cluster 19      | Nrps            | 12866       | Fengycin biosynthetic gene cluster (20% of genes show similarity)     |  <p>Chemical structure of Fengycin biosynthetic gene cluster product. It is a complex molecule with multiple amide bonds, hydroxyl groups, and a terminal carboxylic acid group. A chiral center is indicated.</p>     |
| Cluster 20      | Nrps            | 1637        | Locillomycin biosynthetic gene cluster (21% of genes show similarity) | -                                                                                                                                                                                                                                                                                                           |

Table S1. Continued.

| Strain clusters | Type  | Length (bp) | Most similar known clusters                                       | Predicted core clusters                                                             |
|-----------------|-------|-------------|-------------------------------------------------------------------|-------------------------------------------------------------------------------------|
| <b>7899</b>     |       |             |                                                                   |                                                                                     |
| Cluster 21      | Nrps  | 9028        | Fengycin biosynthetic gene cluster (13% of genes show similarity) | 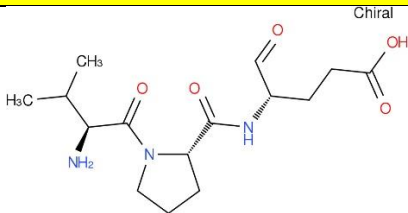 |
| Cluster 22      | Nrps  | 9019        | Surfactin biosynthetic gene cluster (8% of genes show similarity) |  |
| Cluster 23      | Nrps  | 6648        | -                                                                 | -                                                                                   |
| Cluster 24      | Nrps  | 6514        | -                                                                 | -                                                                                   |
| Cluster 25      | Nrps  | 6414        | -                                                                 | -                                                                                   |
| Cluster 26      | Other | 1746        | -                                                                 | -                                                                                   |

Table S1. Continued.

| Strain clusters | Type             | Length (bp) | Most similar known clusters                                             | Predicted core clusters                                                               |
|-----------------|------------------|-------------|-------------------------------------------------------------------------|---------------------------------------------------------------------------------------|
| <b>7751-1</b>   |                  |             |                                                                         |                                                                                       |
| Cluster 1       | Nrps             | 19449       | Fengycin biosynthetic gene cluster (80% of genes show similarity)       | 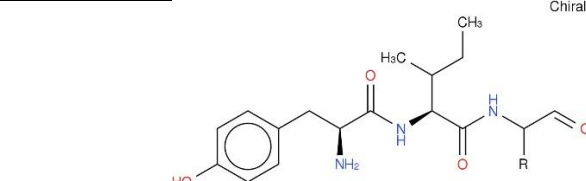   |
| Cluster 2       | Transatpks-Nrps  | 68258       | Bacillomycin biosynthetic gene cluster (100% of genes show similarity)  |    |
| Cluster 3       | Transatpks-Nrps  | 102701      | Bacillaene biosynthetic gene cluster (100% of genes show similarity)    |    |
| Cluster 4       | Transatpks       | 85887       | Macrolactin biosynthetic gene cluster (100% of genes show similarity)   |   |
| Cluster 5       | Terpene          | 20740       | -                                                                       | -                                                                                     |
| Cluster 6       | Otherks          | 41244       | Butirosin biosynthetic gene cluster (7% of genes show similarity)       | -                                                                                     |
| Cluster 7       | Other            | 41418       | Bacilysin biosynthetic gene cluster (100% of genes show similarity)     | -                                                                                     |
| Cluster 8       | Lantipeptide     | 26661       | -                                                                       | -                                                                                     |
| Cluster 9       | Bacteriocin-Nrps | 66416       | Bacillibactin biosynthetic gene cluster (100% of genes show similarity) |  |

Table S1. Continued.

| Strain clusters | Type       | Length (bp) | Most similar known clusters                                         | Predicted core clusters                                                               |
|-----------------|------------|-------------|---------------------------------------------------------------------|---------------------------------------------------------------------------------------|
| <b>7751-1</b>   |            |             |                                                                     |                                                                                       |
| Cluster 10      | Transatpks | 28182       | Difficidin biosynthetic gene cluster (46% of genes show similarity) | 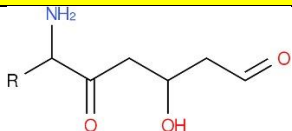   |
| Cluster 11      | Transatpks | 45748       | Difficidin biosynthetic gene cluster (53% of genes show similarity) | -                                                                                     |
| Cluster 12      | T3pks      | 41100       | -                                                                   | -                                                                                     |
| Cluster 13      | Terpene    | 21883       | -                                                                   | -                                                                                     |
| Cluster 14      | Nrps       | 25182       | Surfactin biosynthetic gene cluster (39% of genes show similarity)  | -                                                                                     |
| Cluster 15      | Nrps       | 27617       | Surfactin biosynthetic gene cluster (47% of genes show similarity)  |    |
| Cluster 16      | Ladderane  | 41121       | -                                                                   | -                                                                                     |
| Cluster 17      | Transatpks | 22842       | Difficidin biosynthetic gene cluster (26% of genes show similarity) |    |
| Cluster 18      | Nrps       | 12684       | Fengycin biosynthetic gene cluster (33% of genes show similarity)   |  |

Table S1. Continued.

| Strain clusters | Type  | Length (bp) | Most similar known clusters                                       | Predicted core clusters                                                             |
|-----------------|-------|-------------|-------------------------------------------------------------------|-------------------------------------------------------------------------------------|
| <b>7751-1</b>   |       |             |                                                                   |                                                                                     |
| Cluster 19      | Nrps  | 9194        | Fengycin biosynthetic gene cluster (13% of genes show similarity) | 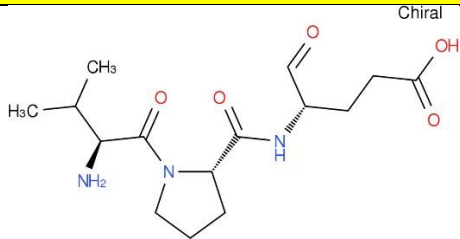 |
| Cluster 20      | Nrps  | 8953        | Surfactin biosynthetic gene cluster (8% of genes show similarity) |  |
| Cluster 21      | Other | 1838        | Orfamide biosynthetic gene cluster (17% of genes show similarity) |                                                                                     |

Table S1. Continued.

| Strain clusters      | Type             | Length (bp) | Most similar known clusters                                             | Predicted core clusters                                                               |
|----------------------|------------------|-------------|-------------------------------------------------------------------------|---------------------------------------------------------------------------------------|
| <b>NWUMFk_BS10.5</b> |                  |             |                                                                         |                                                                                       |
| Cluster 1            | Nrps             | 22316       | Plipastatin biosynthetic gene cluster (30% of genes show similarity)    | -                                                                                     |
| Cluster 2            | Terpene          | 21883       | -                                                                       | -                                                                                     |
| Cluster 3            | T3pks            | 41100       | -                                                                       | -                                                                                     |
| Cluster 4            | Transatpks       | 75782       | Difficidin biosynthetic gene cluster (93% of genes show similarity)     | 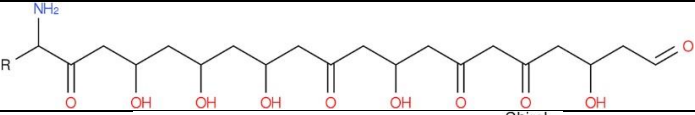   |
| Cluster 5            | Nrps             | 9106        | Fengycin biosynthetic gene cluster (13% of genes show similarity)       |    |
| Cluster 6            | Bacteriocin-Nrps | 66791       | Bacillibactin biosynthetic gene cluster (100% of genes show similarity) |    |
| Cluster 7            | Nrps             | 25599       | Surfactin biosynthetic gene cluster (47% of genes show similarity)      | -                                                                                     |
| Cluster 8            | Nrps             | 1012        | -                                                                       | -                                                                                     |
| Cluster 9            | Nrps             | 27683       | Surfactin biosynthetic gene cluster (47% of genes show similarity)      |  |
| Cluster 10           | Other            | 41418       | Bacilysin biosynthetic gene cluster (100% of genes show similarity)     | -                                                                                     |
| Cluster 11           | Lantipeptide     | 23982       | Mersacidin biosynthetic gene cluster (100% of genes show similarity)    | -                                                                                     |

Table S1. Continued.

| Strain clusters      | Type            | Length (bp) | Most similar known clusters                                         | Predicted core clusters |
|----------------------|-----------------|-------------|---------------------------------------------------------------------|-------------------------|
| <b>NWUMFk_BS10.5</b> |                 |             |                                                                     |                         |
| Cluster 12           | Nrps            | 9409        | Surfactin biosynthetic gene cluster (8% of genes show similarity)   | <p>Chiral</p>           |
| Cluster 13           | Transatpks      | 24696       | Difficidin biosynthetic gene cluster (26% of genes show similarity) |                         |
| Cluster 14           | Nrps            | 13665       | Fengycin biosynthetic gene cluster (20% of genes show similarity)   | <p>Chiral</p>           |
| Cluster 15           | Transatpks-Nrps | 87575       | Fengycin biosynthetic gene cluster (80% of genes show similarity)   | <p>Chiral</p>           |

Table S1. Continued.

| Strain clusters      | Type            | Length (bp) | Most similar known clusters                                           | Predicted core clusters                                                             |
|----------------------|-----------------|-------------|-----------------------------------------------------------------------|-------------------------------------------------------------------------------------|
| <b>NWUMFk_BS10.5</b> |                 |             |                                                                       |                                                                                     |
| Cluster 16           | Transatpks-Nrps | 102395      | Bacillaene biosynthetic gene cluster (100% of genes show similarity)  | 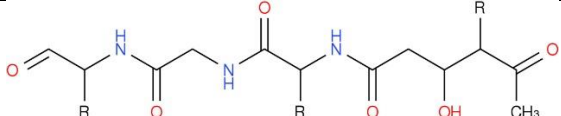 |
| Cluster 17           | Transatpks      | 85881       | Macrolactin biosynthetic gene cluster (100% of genes show similarity) | -                                                                                   |
| Cluster 18           | Terpene         | 20740       | -                                                                     | -                                                                                   |
| Cluster 19           | Otherks         | 41244       | Butirosin biosynthetic gene cluster (7% of genes show similarity)     | -                                                                                   |



Table S1. Continued.

| Strain clusters | Type            | Length (bp) | Most similar known clusters                                           | Predicted core clusters                                                               |
|-----------------|-----------------|-------------|-----------------------------------------------------------------------|---------------------------------------------------------------------------------------|
| <b>7537-G2</b>  |                 |             |                                                                       |                                                                                       |
| Cluster 1       | Lantipeptide    | 26668       | -                                                                     | -                                                                                     |
| Cluster 2       | Other           | 41418       | Bacilysin biosynthetic gene cluster (100% of genes show similarity)   | -                                                                                     |
| Cluster 3       | Transatpks      | 85902       | Macrolactin biosynthetic gene cluster (100% of genes show similarity) | 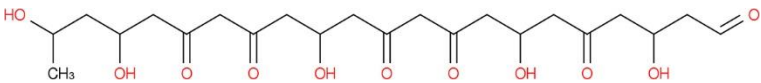   |
| Cluster 4       | Transatpks-Nrps | 102683      | Bacillaene biosynthetic gene cluster (100% of genes show similarity)  |    |
| Cluster 5       | Transatpks-Nrps | 85547       | Fengycin biosynthetic gene cluster (73% of genes show similarity)     |   |
| Cluster 6       | Transatpks      | 28177       | Difficidin biosynthetic gene cluster (46% of genes show similarity)   |  |
| Cluster 7       | Nrps            | 13897       | Plipastatin biosynthetic gene cluster (30% of genes show similarity)  | -                                                                                     |
| Cluster 8       | Terpene         | 21883       | -                                                                     | -                                                                                     |
| Cluster 9       | T3pks           | 41100       | -                                                                     | -                                                                                     |
| Cluster 10      | Transatpks      | 45610       | Difficidin biosynthetic gene cluster (53% of genes show similarity)   |  |

Table S1. Continued.

| Strain clusters | Type             | Length (bp) | Most similar known clusters                                             | Predicted core clusters                                                               |
|-----------------|------------------|-------------|-------------------------------------------------------------------------|---------------------------------------------------------------------------------------|
| <b>7537-G2</b>  |                  |             |                                                                         |                                                                                       |
| Cluster 11      | Terpene          | 20740       | -                                                                       | -                                                                                     |
| Cluster 12      | Otherks          | 31045       | Butirosin biosynthetic gene cluster (7% of genes show similarity)       | -                                                                                     |
| Cluster 13      | Nrps             | 25379       | Surfactin biosynthetic gene cluster (39% of genes show similarity)      | -                                                                                     |
| Cluster 14      | Nrps             | 27928       | Surfactin biosynthetic gene cluster (47% of genes show similarity)      | 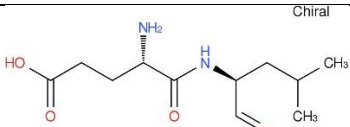   |
| Cluster 15      | Bacteriocin-Nrps | 66792       | Bacillibactin biosynthetic gene cluster (100% of genes show similarity) |    |
| Cluster 16      | Lantipeptide     | 18348       | -                                                                       | -                                                                                     |
| Cluster 17      | Transatpks       | 22675       | Difficidin biosynthetic gene cluster (26% of genes show similarity)     |    |
| Cluster 18      | Nrps             | 12961       | Fengycin biosynthetic gene cluster (20% of genes show similarity)       |   |
| Cluster 19      | Nrps             | 9099        | Fengycin biosynthetic gene cluster (13% of genes show similarity)       |  |

Table S1. Continued.

| Strain clusters | Type  | Length (bp) | Most similar known clusters                                         | Predicted core clusters                                                                        |
|-----------------|-------|-------------|---------------------------------------------------------------------|------------------------------------------------------------------------------------------------|
| <b>7537-G2</b>  |       |             |                                                                     |                                                                                                |
| Cluster 20      | Nrps  | 1565        | -                                                                   | -                                                                                              |
| Cluster 21      | Nrps  | 9434        | Surfactin biosynthetic gene cluster (8% of genes show similarity)   | <div> <div> <chem>CC(C)[C@H](N)C(=O)N[C@@H](C=O)CC(=O)O</chem> </div> <div>Chiral</div> </div> |
| Cluster 22      | Other | 1332        | Bacitracin biosynthetic gene cluster (33% of genes show similarity) | -                                                                                              |

Table S1. Continued.

| Strain clusters | Type             | Length (bp) | Most similar known clusters                                             | Predicted core clusters                                                               |
|-----------------|------------------|-------------|-------------------------------------------------------------------------|---------------------------------------------------------------------------------------|
| <b>7586-G</b>   |                  |             |                                                                         |                                                                                       |
| Cluster 1       | Otherks          | 41244       | Butirosin biosynthetic gene cluster (7% of genes show similarity)       | -                                                                                     |
| Cluster 2       | Terpene          | 20740       | -                                                                       | -                                                                                     |
| Cluster 3       | Transatpks       | 85875       | Macrolactin biosynthetic gene cluster (100% of genes show similarity)   | 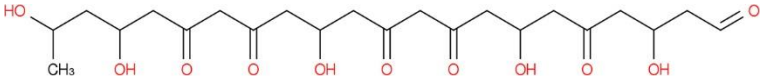   |
| Cluster 4       | Transatpks-Nrps  | 102692      | Bacillaene biosynthetic gene cluster (100% of genes show similarity)    |    |
| Cluster 5       | Transatpks-Nrps  | 87677       | Fengycin biosynthetic gene cluster (80% of genes show similarity)       |    |
| Cluster 6       | Bacteriocin-Nrps | 66793       | Bacillibactin biosynthetic gene cluster (100% of genes show similarity) |   |
| Cluster 7       | Lantipeptide     | 26661       | -                                                                       | -                                                                                     |
| Cluster 8       | Other            | 41418       | Bacilysin biosynthetic gene cluster (100% of genes show similarity)     | -                                                                                     |
| Cluster 9       | Transatpks       | 28111       | Difficidin biosynthetic gene cluster (46% of genes show similarity)     |  |
| Cluster 10      | Terpene          | 21883       | -                                                                       | -                                                                                     |
| Cluster 11      | T3pks            | 41100       | -                                                                       | -                                                                                     |
| Cluster 12      | Transatpks       | 45913       | Difficidin biosynthetic gene cluster (53% of genes show similarity)     |  |

Table S1. Continued.

| Strain clusters | Type            | Length (bp) | Most similar known clusters                                         | Predicted core clusters                                                               |
|-----------------|-----------------|-------------|---------------------------------------------------------------------|---------------------------------------------------------------------------------------|
| <b>7586-G</b>   |                 |             |                                                                     |                                                                                       |
| Cluster 13      | Nrps            | 25224       | Surfactin biosynthetic gene cluster (39% of genes show similarity)  | -                                                                                     |
| Cluster 14      | Nrps            | 28004       | Surfactin biosynthetic gene cluster (47% of genes show similarity)  | 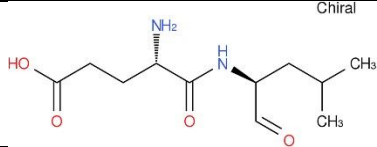   |
| Cluster 15      | Transatpks-Nrps | 46577       | Rhizocticin biosynthetic gene cluster (6% of genes show similarity) |    |
| Cluster 16      | Nrps            | 22450       | Rhizocticin biosynthetic gene cluster (9% of genes show similarity) | -                                                                                     |
| Cluster 17      | Transatpks      | 22945       | Difficidin biosynthetic gene cluster (26% of genes show similarity) |    |
| Cluster 18      | Nrps            | 12998       | Fengycin biosynthetic gene cluster (20% of genes show similarity)   |   |
| Cluster 19      | Nrps            | 9190        | Fengycin biosynthetic gene cluster (13% of genes show similarity)   |  |
| Cluster 20      | Nrps            | 1501        | -                                                                   | -                                                                                     |

Table S1. Continued.

| Strain clusters | Type  | Length (bp) | Most similar known clusters                                       | Predicted core clusters                                                                          |
|-----------------|-------|-------------|-------------------------------------------------------------------|--------------------------------------------------------------------------------------------------|
| <b>7586-G</b>   |       |             |                                                                   |                                                                                                  |
| Cluster 21      | Nrps  | 9355        | Surfactin biosynthetic gene cluster (8% of genes show similarity) | <div> 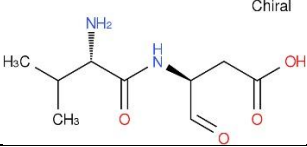 </div> |
| Cluster 22      | Nrps  | 6564        | -                                                                 | -                                                                                                |
| Cluster 23      | Other | 1410        | -                                                                 | -                                                                                                |

Table S1. Continued.

| Strain clusters | Type             | Length (bp) | Most similar known clusters                                             | Predicted core clusters                                                               |
|-----------------|------------------|-------------|-------------------------------------------------------------------------|---------------------------------------------------------------------------------------|
| <b>FTC01</b>    |                  |             |                                                                         |                                                                                       |
| Cluster 1       | Bacteriocin-Nrps | 47085       | Bacillibactin biosynthetic gene cluster (100% of genes show similarity) | 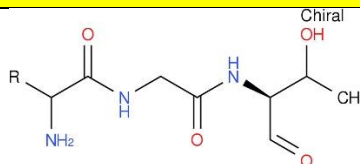   |
| Cluster 2       | Terpene          | 20740       | -                                                                       | -                                                                                     |
| Cluster 3       | Transatpks-Nrps  | 91964       | Bacillaene biosynthetic gene cluster (100% of genes show similarity)    |    |
| Cluster 4       | Terpene          | 21883       | -                                                                       | -                                                                                     |
| Cluster 5       | Transatpks       | 70732       | Difficidin biosynthetic gene cluster (66% of genes show similarity)     |    |
| Cluster 6       | Transatpks-Nrps  | 102759      | Fengycin biosynthetic gene cluster (86% of genes show similarity)       |   |
| Cluster 7       | Transatpks       | 27422       | Macrolactin biosynthetic gene cluster (20% of genes show similarity)    |  |
| Cluster 8       | Other            | 41418       | Bacilysin biosynthetic gene cluster (100% of genes show similarity)     | -                                                                                     |
| Cluster 9       | Transatpks       | 45300       | Macrolactin biosynthetic gene cluster (80% of genes show similarity)    |  |

Table S1. Continued.

| Strain clusters | Type       | Length (bp) | Most similar known clusters                                          | Predicted core clusters                                                               |
|-----------------|------------|-------------|----------------------------------------------------------------------|---------------------------------------------------------------------------------------|
| <b>FTC01</b>    |            |             |                                                                      |                                                                                       |
| Cluster 10      | Transatpks | 17107       | Difficidin biosynthetic gene cluster (46% of genes show similarity)  | 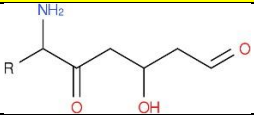   |
| Cluster 11      | T3pks      | 23449       | -                                                                    | -                                                                                     |
| Cluster 12      | Nrps       | 13336       | Fengycin biosynthetic gene cluster (20% of genes show similarity)    |    |
| Cluster 13      | Transatpks | 11118       | Macrolactin biosynthetic gene cluster (40% of genes show similarity) |    |
| Cluster 14      | Transatpks | 7061        | -                                                                    | -                                                                                     |
| Cluster 15      | Nrps       | 3499        | Bacitracin biosynthetic gene cluster (22% of genes show similarity)  | -                                                                                     |
| Cluster 16      | Nrps       | 25483       | Surfactin biosynthetic gene cluster (39% of genes show similarity)   | -                                                                                     |
| Cluster 17      | Transatpks | 2303        | -                                                                    | -                                                                                     |
| Cluster 18      | Other      | 2154        | -                                                                    | -                                                                                     |
| Cluster 19      | Nrps       | 38415       | Surfactin biosynthetic gene cluster (52% of genes show similarity)   |  |
| Cluster 20      | Otherks    | 41244       | Butirosin biosynthetic gene cluster (7% of genes show similarity)    | -                                                                                     |



Table S1. Continued.

| Strain clusters | Type            | Length (bp) | Most similar known clusters                                           | Predicted core clusters                                                               |
|-----------------|-----------------|-------------|-----------------------------------------------------------------------|---------------------------------------------------------------------------------------|
| <b>NKG-1</b>    |                 |             |                                                                       |                                                                                       |
| Cluster 1       | Thiopeptide     | 26795       | -                                                                     | -                                                                                     |
| Cluster 2       | Nrps            | 65407       | Surfactin biosynthetic gene cluster (91% of genes show similarity)    | 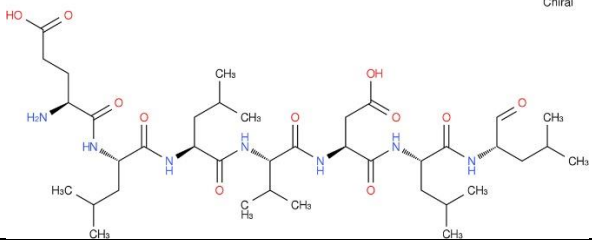   |
| Cluster 3       | Otherks         | 41244       | Butirosin biosynthetic gene cluster (7% of genes show similarity)     | -                                                                                     |
| Cluster 4       | Terpene         | 20740       | -                                                                     | -                                                                                     |
| Cluster 5       | Transatpks      | 85902       | Macrolactin biosynthetic gene cluster (100% of genes show similarity) | -                                                                                     |
| Cluster 6       | Transatpks-Nrps | 102695      | Bacillaene biosynthetic gene cluster (100% of genes show similarity)  |    |
| Cluster 7       | Transatpks-Nrps | 137811      | Fengycin biosynthetic gene cluster (100% of genes show similarity)    |   |
| Cluster 8       | Terpene         | 21883       | -                                                                     | -                                                                                     |
| Cluster 9       | T3pks           | 41100       | -                                                                     | -                                                                                     |
| Cluster 10      | Transatpks      | 98209       | Difficidin biosynthetic gene cluster (100% of genes show similarity)  |  |

Table S1. Continued.

| Strain clusters | Type             | Length (bp) | Most similar known clusters                                             | Predicted core clusters                                                             |
|-----------------|------------------|-------------|-------------------------------------------------------------------------|-------------------------------------------------------------------------------------|
| <b>NKG-1</b>    |                  |             |                                                                         |                                                                                     |
| Cluster 11      | Bacteriocin-Nrps | 66790       | Bacillibactin biosynthetic gene cluster (100% of genes show similarity) | 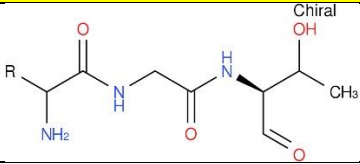 |
| Cluster 12      | Other            | 41418       | Bacilysin biosynthetic gene cluster (100% of genes show similarity)     | -                                                                                   |

Table S1. Continued.

| Strain clusters  | Type    | Length (bp) | Most similar known clusters                                            | Predicted core clusters                                                              |
|------------------|---------|-------------|------------------------------------------------------------------------|--------------------------------------------------------------------------------------|
| <b>MRC_16791</b> |         |             |                                                                        |                                                                                      |
| Cluster 1        | Nrps    | 1913        | -                                                                      | -                                                                                    |
| Cluster 2        | Nrps    | 8491        | -                                                                      | -                                                                                    |
| Cluster 3        | Nrps    | 2808        | -                                                                      | -                                                                                    |
| Cluster 4        | Nrps    | 11305       | Fengycin biosynthetic gene cluster (20% of genes show similarity)      | 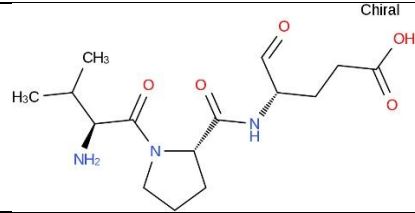  |
| Cluster 5        | Nrps    | 9215        | -                                                                      | -                                                                                    |
| Cluster 6        | Nrps    | 20652       | Surfactin biosynthetic gene cluster (39% of genes show similarity)     | -                                                                                    |
| Cluster 7        | Nrps    | 17069       | Bacillibactin biosynthetic gene cluster (53% of genes show similarity) |   |
| Cluster 8        | Other   | 24605       | Bacilysin biosynthetic gene cluster (100% of genes show similarity)    | -                                                                                    |
| Cluster 9        | Nrps    | 28306       | Surfactin biosynthetic gene cluster (43% of genes show similarity)     |  |
| Cluster 10       | Terpene | 20740       | -                                                                      | -                                                                                    |
| Cluster 11       | Nrps    | 16801       | Plipastatin biosynthetic gene cluster (46% of genes show similarity)   | -                                                                                    |

Table S1. Continued.

| Strain clusters  | Type            | Length (bp) | Most similar known clusters                                            | Predicted core clusters                                                              |
|------------------|-----------------|-------------|------------------------------------------------------------------------|--------------------------------------------------------------------------------------|
| <b>MRC_16791</b> |                 |             |                                                                        |                                                                                      |
| Cluster 12       | Transatpks      | 66239       | Difficidin biosynthetic gene cluster (66% of genes show similarity)    | 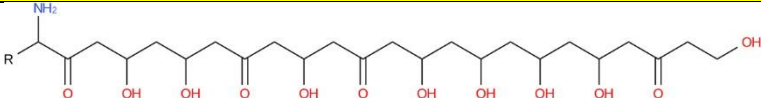  |
| Cluster 13       | Bacteriocin     | 6972        | Amylocyclacin biosynthetic gene cluster (50% of genes show similarity) | -                                                                                    |
| Cluster 14       | Terpene         | 21559       | -                                                                      | -                                                                                    |
| Cluster 15       | Transatpks      | 35488       | Difficidin biosynthetic gene cluster (40% of genes show similarity)    |   |
| Cluster 16       | Transatpks      | 85899       | Macrolactin biosynthetic gene cluster (100% of genes show similarity)  |   |
| Cluster 17       | Nrps            | 26543       | -                                                                      | -                                                                                    |
| Cluster 18       | Transatpks-Nrps | 47671       | Bacillaene biosynthetic gene cluster (78% of genes show similarity)    |   |
| Cluster 19       | Transatpks-Nrps | 88577       | Fengycin biosynthetic gene cluster (86% of genes show similarity)      |  |

Table S1. Continued.

| Strain clusters  | Type            | Length (bp) | Most similar known clusters                                                     | Predicted core clusters                                                                          |
|------------------|-----------------|-------------|---------------------------------------------------------------------------------|--------------------------------------------------------------------------------------------------|
| <b>MRC_16791</b> |                 |             |                                                                                 |                                                                                                  |
| Cluster 20       | Transatpks-Nrps | 113326      | Kalimantacin / batumin biosynthetic gene cluster (17% of genes show similarity) | <div> 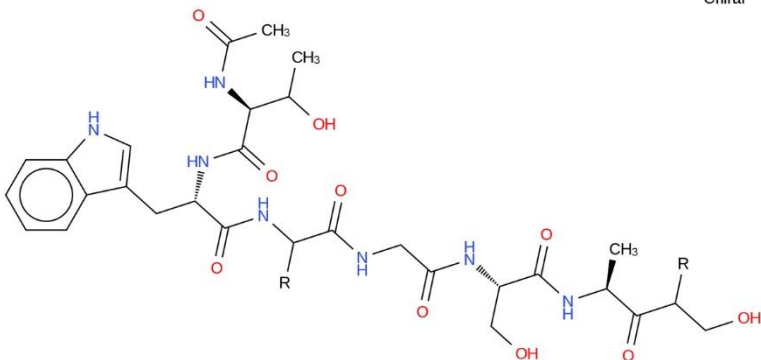 </div> |
| Cluster 21       | Lantipeptide    | 28889       | -                                                                               | -                                                                                                |
| Cluster 22       | Otherks         | 41244       | Butirosin biosynthetic gene cluster (7% of genes show similarity)               | -                                                                                                |

Table S1. Continued.

| Strain clusters | Type                       | Length (bp) | Most similar known clusters                                                                   | Predicted core clusters                                                               |
|-----------------|----------------------------|-------------|-----------------------------------------------------------------------------------------------|---------------------------------------------------------------------------------------|
| <b>GF610</b>    |                            |             |                                                                                               |                                                                                       |
| Cluster 1       | Nrps                       | 10013       | Fengycin biosynthetic gene cluster (20% of genes show similarity)                             | 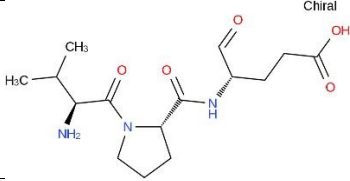   |
| Cluster 2       | Bacteriocin-Transatpk-Nrps | 101372      | Fengycin biosynthetic gene cluster (80% of genes show similarity)                             |    |
| Cluster 3       | Transatpk-Nrps             | 92444       | Bacillaene biosynthetic gene cluster (100% of genes show similarity)                          |    |
| Cluster 4       | Terpene                    | 20740       | -                                                                                             | -                                                                                     |
| Cluster 5       | Otherks                    | 34430       | Butirosin biosynthetic gene cluster (7% of genes show similarity)                             | -                                                                                     |
| Cluster 6       | Lantipeptide               | 27137       | Haloduracin_alpha / haloduracin beta biosynthetic gene cluster (40% of genes show similarity) | -                                                                                     |
| Cluster 7       | Nrps                       | 26295       | Surfactin biosynthetic gene cluster (47% of genes show similarity)                            | -                                                                                     |
| Cluster 8       | Nrps                       | 39238       | Surfactin biosynthetic gene cluster (52% of genes show similarity)                            |  |

Table S1. Continued.

| Strain clusters | Type             | Length (bp) | Most similar known clusters                                            | Predicted core clusters                                                               |
|-----------------|------------------|-------------|------------------------------------------------------------------------|---------------------------------------------------------------------------------------|
| <b>GF610</b>    |                  |             |                                                                        |                                                                                       |
| Cluster 9       | Transatpks-Nrps  | 77736       | Rhizoctin biosynthetic gene cluster (22% of genes show similarity)     | 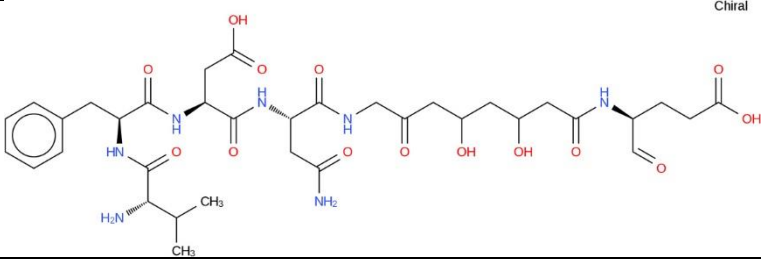   |
| Cluster 10      | Other            | 29708       | Bacilysin biosynthetic gene cluster (100% of genes show similarity)    | -                                                                                     |
| Cluster 11      | Bacteriocin-Nrps | 47170       | Bacillibactin biosynthetic gene cluster (84% of genes show similarity) |    |
| Cluster 12      | Transatpks       | 86482       | Difficidin biosynthetic gene cluster (100% of genes show similarity)   |    |
| Cluster 13      | Transatpks       | 85899       | Macrolactin biosynthetic gene cluster (100% of genes show similarity)  |    |
| Cluster 14      | T3pks            | 41373       | -                                                                      | -                                                                                     |
| Cluster 15      | Terpene          | 21883       | -                                                                      | -                                                                                     |
| Cluster 16      | Nrps             | 3179        | -                                                                      | -                                                                                     |
| Cluster 17      | Nrps             | 14428       | Fengycin biosynthetic gene cluster (26% of genes show similarity)      |  |

Table S1. Continued.

| Strain clusters | Type             | Length (bp) | Most similar known clusters                                             | Predicted core clusters                                                               |
|-----------------|------------------|-------------|-------------------------------------------------------------------------|---------------------------------------------------------------------------------------|
| <b>JW</b>       |                  |             |                                                                         |                                                                                       |
| Cluster 1       | Other            | 41418       | Bacilysin biosynthetic gene cluster (100% of genes show similarity)     | -                                                                                     |
| Cluster 2       | Nrps             | 48208       | -                                                                       | -                                                                                     |
| Cluster 3       | Bacteriocin-Nrps | 66794       | Bacillibactin biosynthetic gene cluster (100% of genes show similarity) | 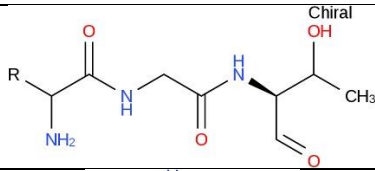   |
| Cluster 4       | Transatpks       | 99772       | Difficidin biosynthetic gene cluster (100% of genes show similarity)    |    |
| Cluster 5       | T3pks            | 41100       | -                                                                       | -                                                                                     |
| Cluster 6       | Terpene          | 21883       | -                                                                       | -                                                                                     |
| Cluster 7       | Transatpks-Nrps  | 111359      | Fengycin biosynthetic gene cluster (93% of genes show similarity)       |   |
| Cluster 8       | Transatpks-Nrps  | 102686      | Bacillaene biosynthetic gene cluster (100% of genes show similarity)    |  |



Table S1. Continued.

| Strain clusters | Type        | Length (bp) | Most similar known clusters                                           | Predicted core clusters                                                             |
|-----------------|-------------|-------------|-----------------------------------------------------------------------|-------------------------------------------------------------------------------------|
| <b>JW</b>       |             |             |                                                                       |                                                                                     |
| Cluster 9       | Transatpks  | 85902       | Macrolactin biosynthetic gene cluster (100% of genes show similarity) | -                                                                                   |
| Cluster 10      | Terpene     | 20740       | -                                                                     | -                                                                                   |
| Cluster 11      | Otherks     | 41244       | Butirosin biosynthetic gene cluster (7% of genes show similarity)     | -                                                                                   |
| Cluster 12      | Phosphonate | 40884       | -                                                                     | -                                                                                   |
| Cluster 13      | Nrps        | 64595       | Surfactin biosynthetic gene cluster (82% of genes show similarity)    | 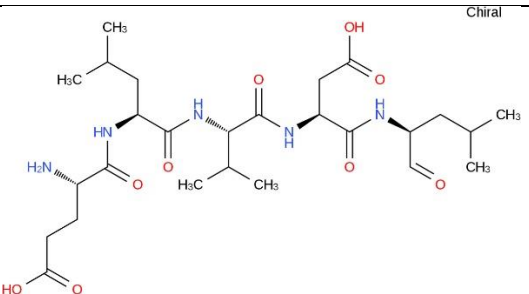 |
| Cluster 14      | Nrps        | 8172        | -                                                                     | -                                                                                   |
| Cluster 15      | Nrps        | 2173        | -                                                                     | -                                                                                   |
| Cluster 16      | Nrps        | 6438        | -                                                                     | -                                                                                   |

Table S1. Continued.

| Strain clusters | Type             | Length (bp) | Most similar known clusters                                             | Predicted core clusters                                                               |
|-----------------|------------------|-------------|-------------------------------------------------------------------------|---------------------------------------------------------------------------------------|
| <b>GFP-2</b>    |                  |             |                                                                         |                                                                                       |
| Cluster 1       | T3pks            | 41100       | -                                                                       | -                                                                                     |
| Cluster 2       | Transatpks       | 100450      | Difficidin biosynthetic gene cluster (100% of genes show similarity)    | 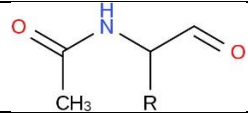   |
| Cluster 3       | Nrps             | 52064       | -                                                                       | -                                                                                     |
| Cluster 4       | Bacteriocin-Nrps | 66793       | Bacillibactin biosynthetic gene cluster (100% of genes show similarity) |    |
| Cluster 5       | Lantipeptide     | 26661       | -                                                                       | -                                                                                     |
| Cluster 6       | Nrps             | 84179       | Bacilysin biosynthetic gene cluster (100% of genes show similarity)     |   |
| Cluster 7       | Nrps             | 65407       | Surfactin biosynthetic gene cluster (91% of genes show similarity)      |  |

Table S1. Continued.

| Strain clusters | Type            | Length (bp) | Most similar known clusters                                           | Predicted core clusters                                                              |
|-----------------|-----------------|-------------|-----------------------------------------------------------------------|--------------------------------------------------------------------------------------|
| <b>GFP-2</b>    |                 |             |                                                                       |                                                                                      |
| Cluster 8       | Bacteriocin     | 10851       | -                                                                     | -                                                                                    |
| Cluster 9       | Otherks         | 41244       | Butirosin biosynthetic gene cluster (7% of genes show similarity)     | -                                                                                    |
| Cluster 10      | Terpene         | 20740       | -                                                                     | -                                                                                    |
| Cluster 11      | Transatpks      | 85875       | Macrolactin biosynthetic gene cluster (100% of genes show similarity) | -                                                                                    |
| Cluster 12      | Transatpks-Nrps | 102701      | Bacillaene biosynthetic gene cluster (100% of genes show similarity)  | 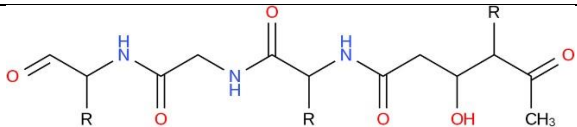  |
| Cluster 13      | Transatpks-Nrps | 137851      | Fengycin biosynthetic gene cluster (100% of genes show similarity)    |  |
| Cluster 14      | Terpene         | 21883       | -                                                                     | -                                                                                    |

Table S1. Continued.

| Strain clusters | Type             | Length (bp) | Most similar known clusters                                             | Predicted core clusters                                                               |
|-----------------|------------------|-------------|-------------------------------------------------------------------------|---------------------------------------------------------------------------------------|
| <b>PG12</b>     |                  |             |                                                                         |                                                                                       |
| Cluster 1       | Nrps             | 65407       | Surfactin biosynthetic gene cluster (78% of genes show similarity)      | 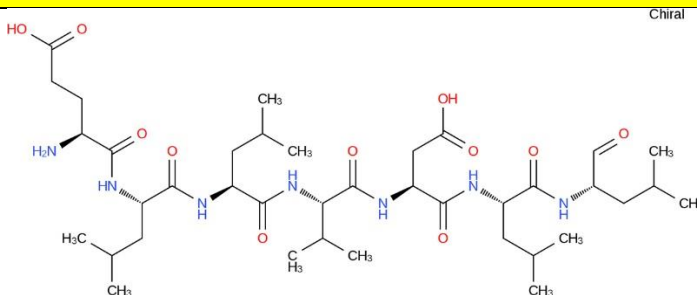   |
| Cluster 2       | Other            | 41418       | Bacilysin biosynthetic gene cluster (100% of genes show similarity)     | -                                                                                     |
| Cluster 3       | Bacteriocin-Nrps | 66792       | Bacillibactin biosynthetic gene cluster (100% of genes show similarity) |    |
| Cluster 4       | Transatpks       | 100447      | Difficidin biosynthetic gene cluster (100% of genes show similarity)    |    |
| Cluster 5       | T3pks            | 41100       | -                                                                       | -                                                                                     |
| Cluster 6       | Terpene          | 21883       | -                                                                       | -                                                                                     |
| Cluster 7       | Transatpks-Nrps  | 148744      | Fengycin biosynthetic gene cluster (100% of genes show similarity)      |  |

Table S1. Continued.

| Strain clusters | Type            | Length (bp) | Most similar known clusters                                           | Predicted core clusters                                                             |
|-----------------|-----------------|-------------|-----------------------------------------------------------------------|-------------------------------------------------------------------------------------|
| <b>PG12</b>     |                 |             |                                                                       |                                                                                     |
| Cluster 8       | Transatpks-Nrps | 102971      | Bacillaene biosynthetic gene cluster (100% of genes show similarity)  | 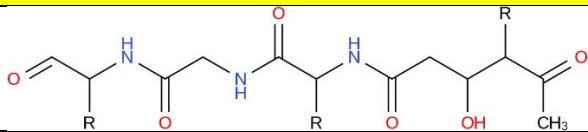 |
| Cluster 9       | Transatpks      | 85884       | Macrolactin biosynthetic gene cluster (100% of genes show similarity) | -                                                                                   |
| Cluster 10      | Terpene         | 20740       | -                                                                     | -                                                                                   |
| Cluster 11      | Otherks         | 41244       | Butirosin biosynthetic gene cluster (7% of genes show similarity)     | -                                                                                   |

Table S1. Continued.

| Strain clusters | Type            | Length (bp) | Most similar known clusters                                           | Predicted core clusters                                                               |
|-----------------|-----------------|-------------|-----------------------------------------------------------------------|---------------------------------------------------------------------------------------|
| <b>J01</b>      |                 |             |                                                                       |                                                                                       |
| Cluster 1       | Transatpks-Nrps | 70521       | Locillomycin biosynthetic gene cluster (35% of genes show similarity) | 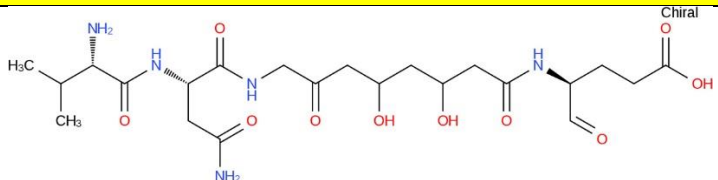   |
| Cluster 2       | Nrps            | 65822       | Surfactin biosynthetic gene cluster (82% of genes show similarity)    |    |
| Cluster 3       | Nrps            | 74329       | Fengycin biosynthetic gene cluster (20% of genes show similarity)     |   |
| Cluster 4       | Otherks         | 41244       | Butirosin biosynthetic gene cluster (7% of genes show similarity)     | -                                                                                     |
| Cluster 5       | Terpene         | 20740       | -                                                                     | -                                                                                     |
| Cluster 6       | Lantipeptide    | 28889       | -                                                                     | -                                                                                     |
| Cluster 7       | Transatpks      | 85883       | Macrolactin biosynthetic gene cluster (100% of genes show similarity) |  |
| Cluster 8       | Transatpks-Nrps | 102690      | Bacillaene biosynthetic gene cluster (100% of genes show similarity)  |  |

Table S1. Continued.

| Strain clusters | Type             | Length (bp) | Most similar known clusters                                             | Predicted core clusters                                                               |
|-----------------|------------------|-------------|-------------------------------------------------------------------------|---------------------------------------------------------------------------------------|
| <b>J01</b>      |                  |             |                                                                         |                                                                                       |
| Cluster 9       | Transatpks-Nrps  | 122188      | Fengycin biosynthetic gene cluster (93% of genes show similarity)       | 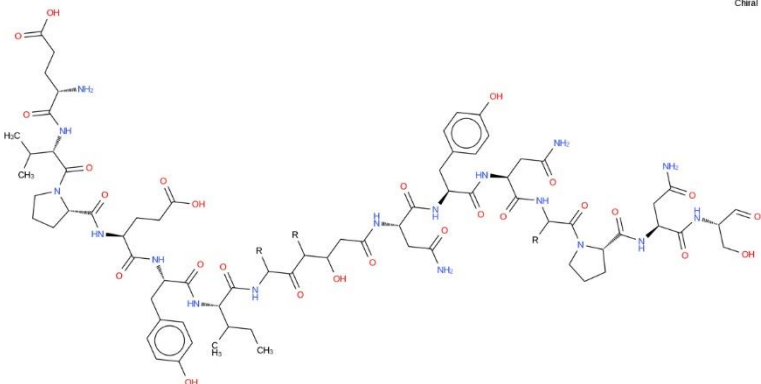   |
| Cluster 10      | Terpene          | 21883       | -                                                                       | -                                                                                     |
| Cluster 11      | T3pks            | 41100       | -                                                                       | -                                                                                     |
| Cluster 12      | Transatpks       | 75766       | Difficidin biosynthetic gene cluster (86% of genes show similarity)     |    |
| Cluster 13      | Bacteriocin-Nrps | 66943       | Bacillibactin biosynthetic gene cluster (100% of genes show similarity) |   |
| Cluster 14      | Other            | 41418       | Bacilysin biosynthetic gene cluster (100% of genes show similarity)     | -                                                                                     |
| Cluster 15      | Transatpks       | 45185       | Difficidin biosynthetic gene cluster (26% of genes show similarity)     |  |

Table S1. Continued.

| Strain clusters | Type            | Length (bp) | Most similar known clusters                                           | Predicted core clusters                                                               |
|-----------------|-----------------|-------------|-----------------------------------------------------------------------|---------------------------------------------------------------------------------------|
| <b>Lzh-a42</b>  |                 |             |                                                                       |                                                                                       |
| Cluster 1       | Nrps            | 65411       | Surfactin biosynthetic gene cluster (82% of genes show similarity)    | 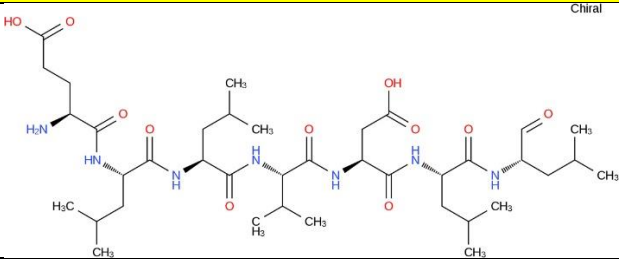   |
| Cluster 2       | Phosphonate     | 40884       | -                                                                     | -                                                                                     |
| Cluster 3       | Otherks         | 41244       | Butirosin biosynthetic gene cluster (7% of genes show similarity)     | -                                                                                     |
| Cluster 4       | Terpene         | 20740       | -                                                                     | -                                                                                     |
| Cluster 5       | Transatpks      | 85902       | Macrolactin biosynthetic gene cluster (100% of genes show similarity) | -                                                                                     |
| Cluster 6       | Transatpks-Nrps | 102680      | Bacillaene biosynthetic gene cluster (100% of genes show similarity)  |    |
| Cluster 7       | Transatpks-Nrps | 137830      | Fengycin biosynthetic gene cluster (100% of genes show similarity)    |   |
| Cluster 8       | Terpene         | 21883       | -                                                                     | -                                                                                     |
| Cluster 9       | T3pks           | 41100       | -                                                                     | -                                                                                     |
| Cluster 10      | Transatpks      | 100444      | Difficidin biosynthetic gene cluster (100% of genes show similarity)  |  |



Table S1. Continued.

| Strain clusters | Type             | Length (bp) | Most similar known clusters                                             | Predicted core clusters                                                             |
|-----------------|------------------|-------------|-------------------------------------------------------------------------|-------------------------------------------------------------------------------------|
| <b>Lzh-a42</b>  |                  |             |                                                                         |                                                                                     |
| Cluster 11      | Bacteriocin-Nrps | 66796       | Bacillibactin biosynthetic gene cluster (100% of genes show similarity) | 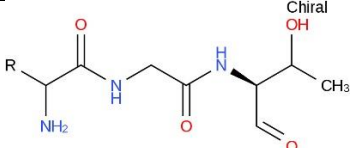 |
| Cluster 12      | Nrps             | 68420       | -                                                                       | -                                                                                   |
| Cluster 13      | Other            | 41418       | Bacilysin biosynthetic gene cluster (100% of genes show similarity)     | -                                                                                   |
| Cluster 14      | Lantipeptide     | 23984       | Mersacidin biosynthetic gene cluster (100% of genes show similarity)    | -                                                                                   |

Table S1. Continued.

| Strain clusters | Type            | Length (bp) | Most similar known clusters                                           | Predicted core clusters                                                               |
|-----------------|-----------------|-------------|-----------------------------------------------------------------------|---------------------------------------------------------------------------------------|
| <b>CMT-6</b>    |                 |             |                                                                       |                                                                                       |
| Cluster 1       | Transatpks-Nrps | 77723       | Locillomycin biosynthetic gene cluster (35% of genes show similarity) | 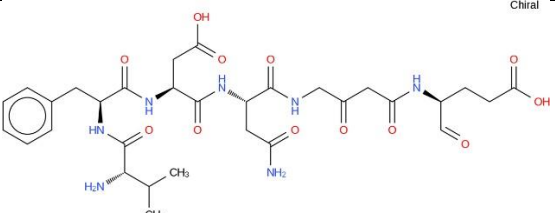   |
| Cluster 2       | Nrps            | 65407       | Surfactin biosynthetic gene cluster (82% of genes show similarity)    |    |
| Cluster 3       | Otherks         | 41244       | Butirosin biosynthetic gene cluster (7% of genes show similarity)     | -                                                                                     |
| Cluster 4       | Terpene         | 20740       | -                                                                     | -                                                                                     |
| Cluster 5       | Lantipeptide    | 28889       | -                                                                     | -                                                                                     |
| Cluster 6       | Transatpks      | 85875       | Macrolactin biosynthetic gene cluster (100% of genes show similarity) | -                                                                                     |
| Cluster 7       | Transatpks-Nrps | 102701      | Bacillaene biosynthetic gene cluster (100% of genes show similarity)  |  |
| Cluster 8       | Transatpks-Nrps | 137831      | Fengycin biosynthetic gene cluster (100% of genes show similarity)    |  |

Table S1. Continued.

| Strain clusters | Type             | Length (bp) | Most similar known clusters                                             | Predicted core clusters                                                             |
|-----------------|------------------|-------------|-------------------------------------------------------------------------|-------------------------------------------------------------------------------------|
| <b>CMT-6</b>    |                  |             |                                                                         |                                                                                     |
| Cluster 9       | Terpene          | 21883       | -                                                                       | -                                                                                   |
| Cluster 10      | T3pks            | 41100       | -                                                                       | -                                                                                   |
| Cluster 11      | Transatpks       | 100450      | Difficidin biosynthetic gene cluster (100% of genes show similarity)    | 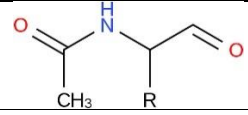 |
| Cluster 12      | Bacteriocin-Nrps | 66790       | Bacillibactin biosynthetic gene cluster (100% of genes show similarity) |  |
| Cluster 13      | Other            | 41418       | Bacilysin biosynthetic gene cluster (100% of genes show similarity)     | -                                                                                   |

Table S1. Continued.

| Strain clusters | Type            | Length (bp) | Most similar known clusters                                           | Predicted core clusters                                                               |
|-----------------|-----------------|-------------|-----------------------------------------------------------------------|---------------------------------------------------------------------------------------|
| <b>CN026</b>    |                 |             |                                                                       |                                                                                       |
| Cluster 1       | Nrps            | 65407       | Surfactin biosynthetic gene cluster (82% of genes show similarity)    | 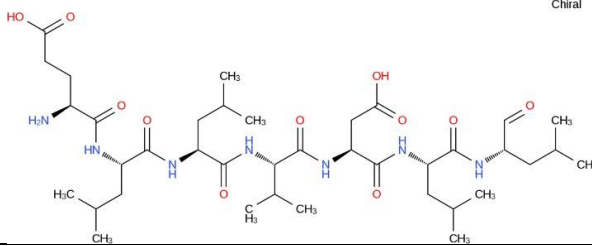   |
| Cluster 2       | Phosphonate     | 40884       | -                                                                     | -                                                                                     |
| Cluster 3       | Otherks         | 41244       | Butirosin biosynthetic gene cluster (7% of genes show similarity)     | -                                                                                     |
| Cluster 4       | Terpene         | 20740       | -                                                                     | -                                                                                     |
| Cluster 5       | Transatpks      | 85902       | Macrolactin biosynthetic gene cluster (100% of genes show similarity) | -                                                                                     |
| Cluster 6       | Transatpks-Nrps | 102683      | Bacillaene biosynthetic gene cluster (100% of genes show similarity)  |    |
| Cluster 7       | Transatpks-Nrps | 137831      | Fengycin biosynthetic gene cluster (100% of genes show similarity)    |   |
| Cluster 8       | Terpene         | 21883       | -                                                                     | -                                                                                     |
| Cluster 9       | T3pks           | 41100       | -                                                                     | -                                                                                     |
| Cluster 10      | Transatpks      | 100444      | Difficidin biosynthetic gene cluster (100% of genes show similarity)  |  |

Table S1. Continued.

| Strain clusters | Type             | Length (bp) | Most similar known clusters                                             | Predicted core clusters                                                             |
|-----------------|------------------|-------------|-------------------------------------------------------------------------|-------------------------------------------------------------------------------------|
| <b>CN026</b>    |                  |             |                                                                         |                                                                                     |
| Cluster 11      | Bacteriocin-Nrps | 66794       | Bacillibactin biosynthetic gene cluster (100% of genes show similarity) | 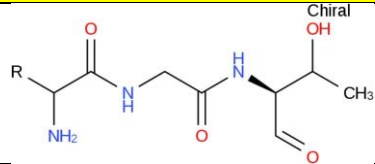 |
| Cluster 12      | Nrps             | 65342       | -                                                                       | -                                                                                   |
| Cluster 13      | Other            | 41418       | Bacilysin biosynthetic gene cluster (100% of genes show similarity)     | -                                                                                   |
